# Supplementary material for: The absolute configurations of hyperilongenols A–C: rare 12,13-seco-spirocyclic polycyclic polyprenylated acylphloroglucinols with enolizable β,β′-tricarbonyl systems from Hypericum longistylum Oliv.
Source: Royal Society of Chemistry journal article supplement (doi:10.1039/c9qo00245f), 2019-01-01

## Supporting Information

# The Absolute Configurations of Hyperilongenols A–C: Rare 12,13-*Seco*-Spirocyclic Polycyclic Polyprenylated Acylphloroglucinols with Enolizable $\beta,\beta'$ -Tricarbonyl Systems from *Hypericum longistylum* Oliv.

Na Zhang,<sup>a</sup> Zhengyi Shi,<sup>a</sup> Yi Guo,<sup>a</sup> Shuangshuang Xie,<sup>a</sup> Yuben Qiao,<sup>a</sup> Xiao-Nian Li,<sup>b</sup> Yongbo Xue,<sup>\*a</sup> Zengwei Luo,<sup>a</sup> Hucheng Zhu,<sup>a</sup> Chunmei Chen,<sup>a</sup> Linzhen Hu,<sup>a,c</sup> Yonghui Zhang<sup>\*a</sup>

<sup>a</sup>*Hubei Key Laboratory of Natural Medicinal Chemistry and Resource Evaluation, School of Pharmacy, Tongji Medical College, Huazhong University of Science and Technology, Wuhan 430030, Hubei Province, People's Republic of China.*

<sup>b</sup>*State Key Laboratory of Phytochemistry and Plant Resources in West China, Kunming Institute of Botany, Chinese Academy of Sciences, Kunming 650204, Yunnan Province, People's Republic of China.*

<sup>c</sup>*National & Local Joint Engineering Research Center of High-throughput Drug Screening Technology, Hubei Key Laboratory of Biotechnology of Chinese Traditional Medicine, School of Life Sciences, Hubei University Wuhan 430062, Hubei Province, People's Republic of China.*

E-mails:

zhangyh@mails.tjmu.edu.cn (Y.Z.); yongboxue@mail.hust.edu.cn (Y.X.)

## CONTENTS

|                                                                                                                                                                                                |    |
|------------------------------------------------------------------------------------------------------------------------------------------------------------------------------------------------|----|
| <b>Figures S1-S8.</b> <sup>1</sup> H NMR (800 MHz) spectra of compound <b>1</b> (Recorded in C <sub>5</sub> D <sub>5</sub> N/CDCl <sub>3</sub> , 343 K-280 K).....                             | 1  |
| <b>Figures S9-S11.</b> <sup>1</sup> H NMR (600 MHz) spectra of compound <b>1</b> in the region of 0-20 ppm (Recorded in C <sub>5</sub> D <sub>5</sub> N/CDCl <sub>3</sub> , 313 K-280 K) ..... | 5  |
| <b>Figure S12.</b> Key <sup>1</sup> H- <sup>1</sup> H COSY and HMBC correlations of compounds <b>2-3</b> .....                                                                                 | 6  |
| <b>Figures S13-S14.</b> <sup>1</sup> H NMR (600 MHz) spectra of compounds <b>2-3</b> in the region of 0-20 ppm (Recorded in C <sub>5</sub> D <sub>5</sub> N, 298 K) .....                      | 7  |
| <b>Figures S15-S18.</b> <sup>1</sup> H NMR (600 MHz) spectra of compounds <b>2-3</b> in the region of 0-20 ppm (Recorded in CDCl <sub>3</sub> , 313 K/298 K) .....                             | 8  |
| <b>Figures S19-S20.</b> The mutual transformation of enol tautomers of compounds <b>2-3</b> .....                                                                                              | 10 |
| <b>Figure S21.</b> Experimental ECD spectra of <b>1-3</b> .....                                                                                                                                | 10 |
| <b>Figures S22-S24.</b> <sup>1</sup> H NMR (600 MHz) spectra of compounds <b>1-3</b> (Recorded in DMSO- <i>d</i> <sub>6</sub> , 298 K).....                                                    | 11 |
| <b>Table S1</b> PPAPs with enolizable $\beta,\beta'$ -triC or $\beta$ -diC systems.....                                                                                                        | 12 |
| <b>Table S2.</b> Antibacterial activities of compounds <b>1-3</b> with MIC <sub>50</sub> Values $\pm$ SD ( $\mu$ M) .....                                                                      | 16 |
| <b>Figures S25-S51.</b> 1D and 2D NMR (C <sub>5</sub> D <sub>5</sub> N, 298 K), HRESIMS, UV, IR spectra of compounds <b>1-3</b> .....                                                          | 17 |
| <b>Figures S52-S116.</b> 1D and 2D NMR, HRESIMS spectra of compounds <b>4-13</b> .....                                                                                                         | 32 |
| <b>Figures S117-S119.</b> Experimental ECD spectra of <b>4-13</b> .....                                                                                                                        | 72 |

**Figure S1.**  $^1\text{H}$  NMR (800 MHz) spectrum of compound **1** (Recorded in  $\text{C}_5\text{D}_5\text{N}$ , 343 K)

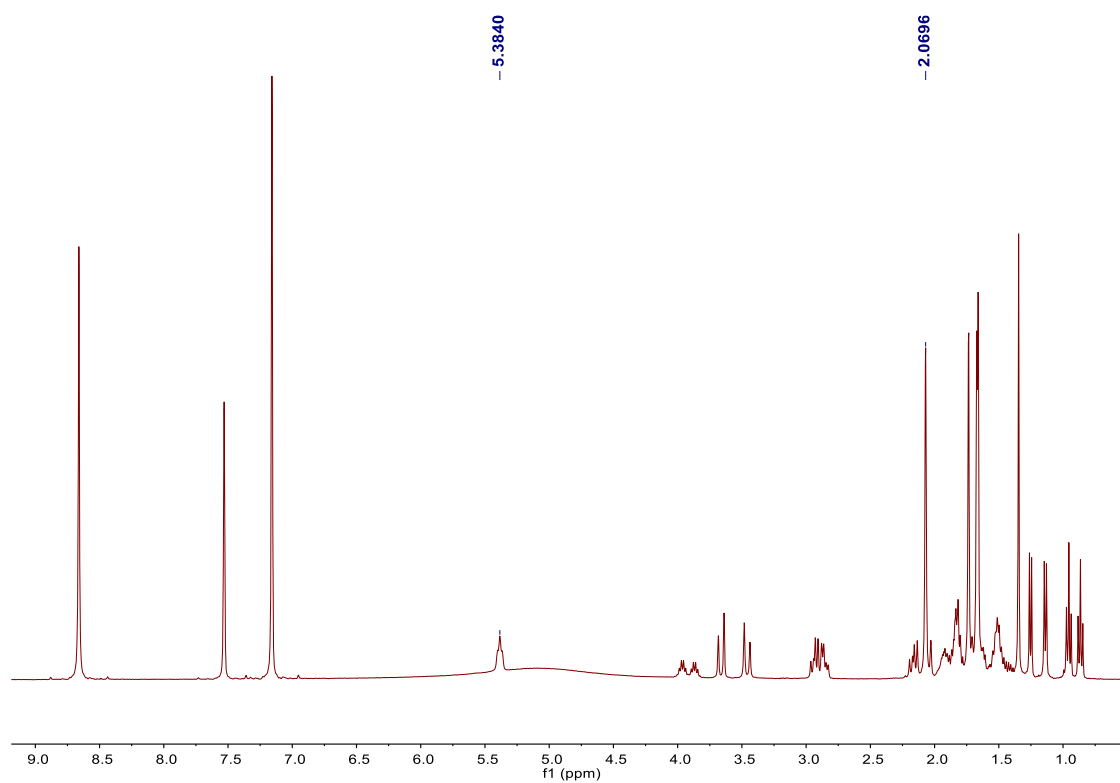

**Figure S2.**  $^1\text{H}$  NMR (800 MHz) spectrum of compound **1** (Recorded in  $\text{C}_5\text{D}_5\text{N}$ , 313 K)

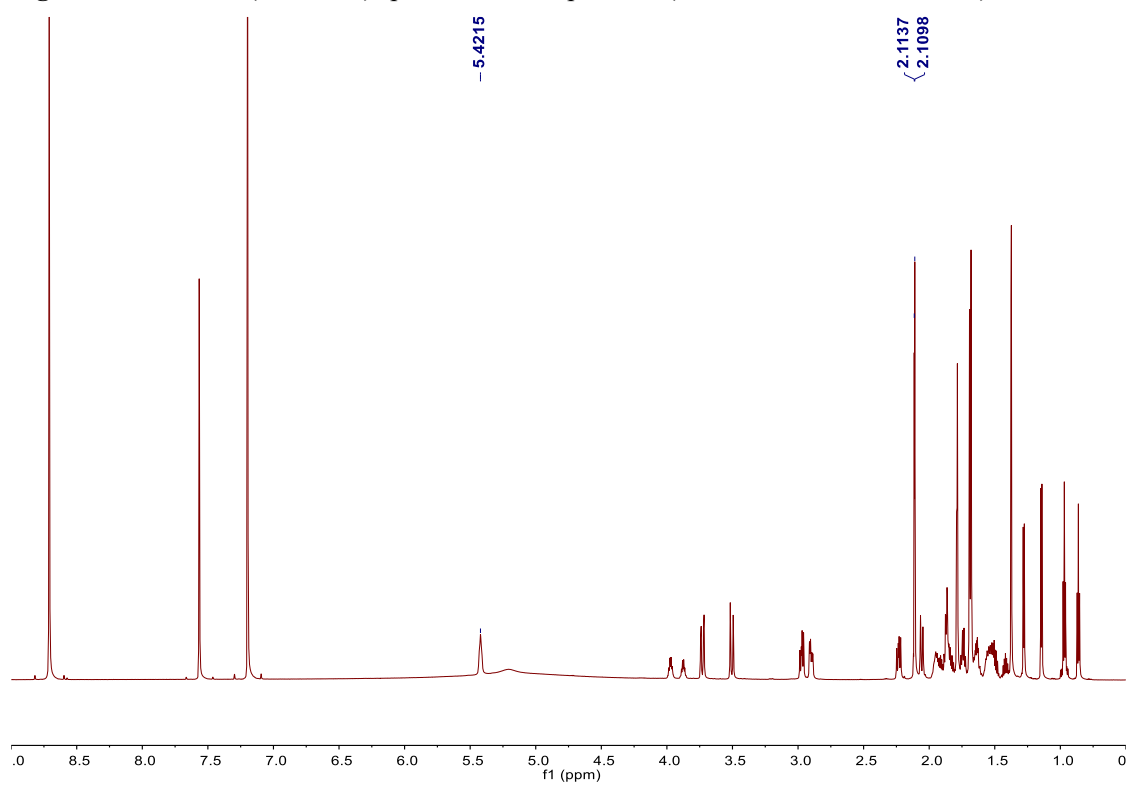

**Figure S3.**  $^1\text{H}$  NMR (800 MHz) spectrum of compound **1** (Recorded in  $\text{C}_5\text{D}_5\text{N}$ , 298 K)

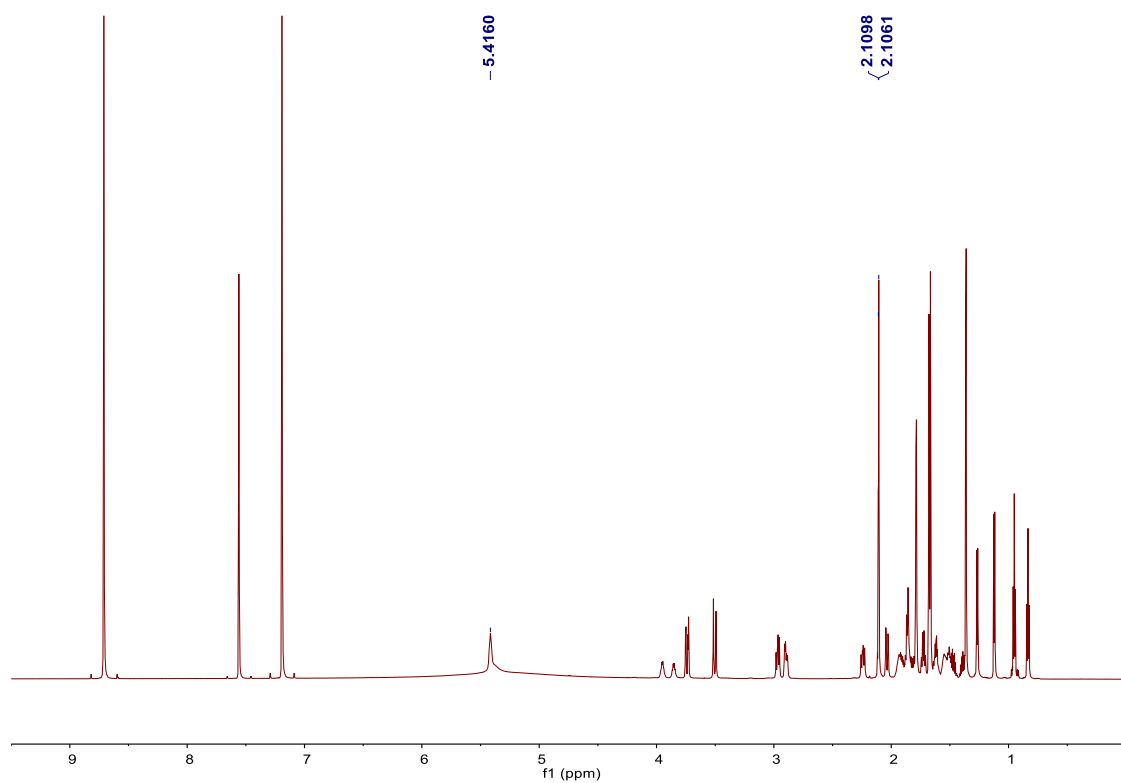

**Figure S4.**  $^1\text{H}$  NMR (800 MHz) spectrum of compound **1** (Recorded in  $\text{C}_5\text{D}_5\text{N}$ , 280 K)

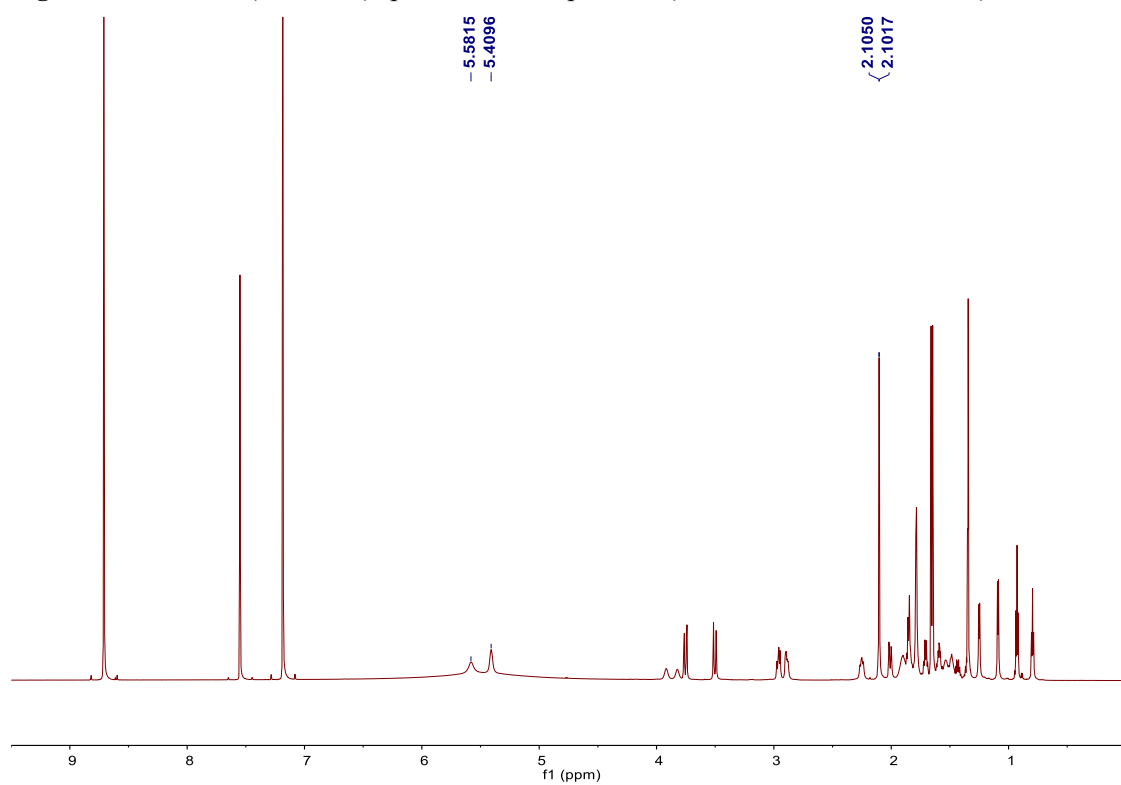



**Figure S5.**  $^1\text{H}$  NMR (800 MHz) spectrum of compound **1** (Recorded in  $\text{CDCl}_3$ , 313 K)

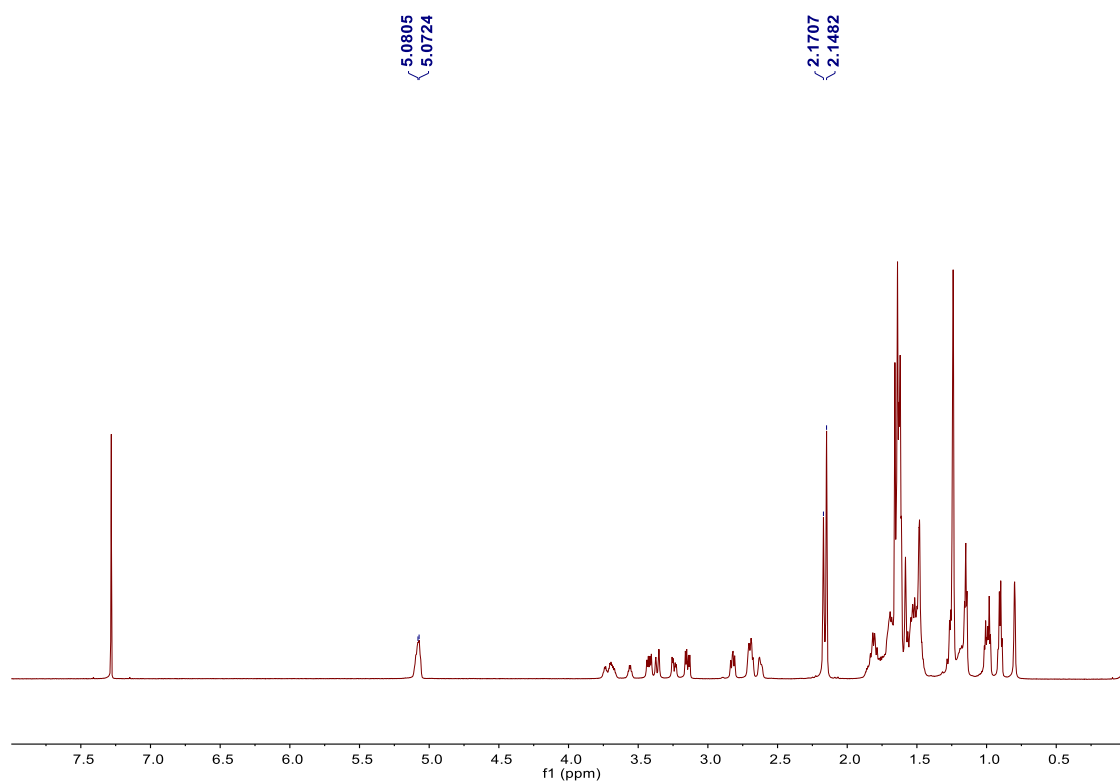

**Figure S6.**  $^1\text{H}$  NMR (800 MHz) spectrum of compound **1** (Recorded in  $\text{CDCl}_3$ , 308 K)

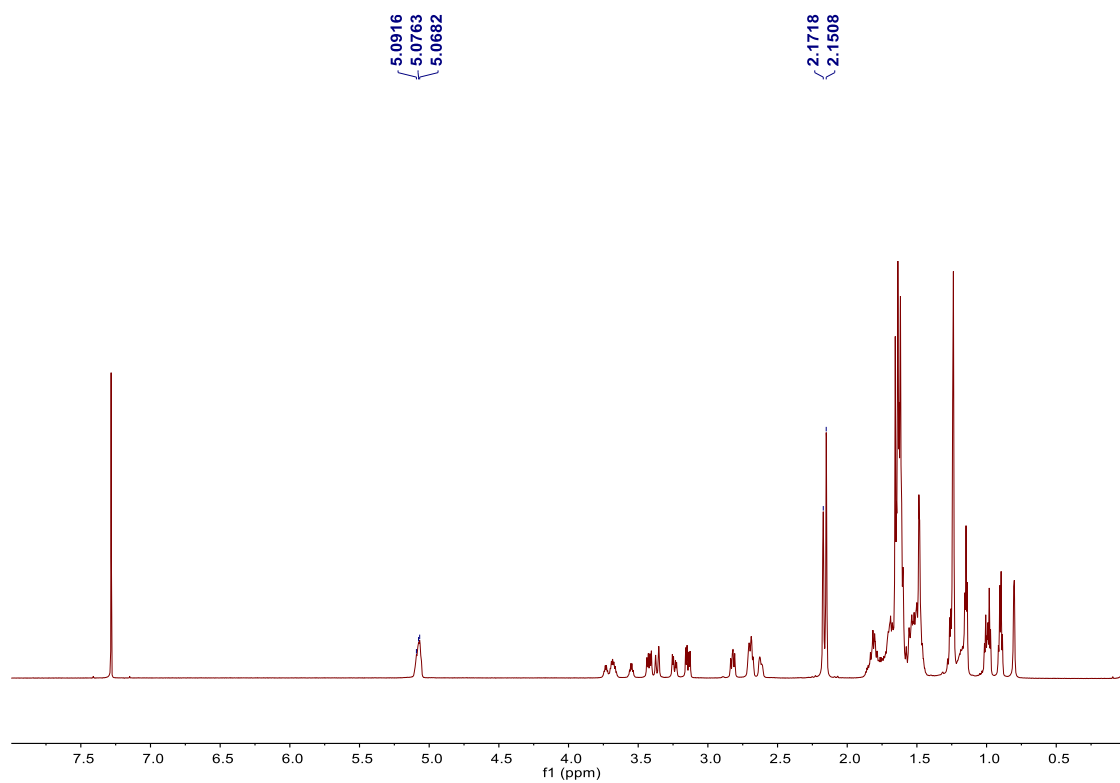

**Figure S7.**  $^1\text{H}$  NMR (800 MHz) spectrum of compound **1** (Recorded in  $\text{CDCl}_3$ , 298 K)

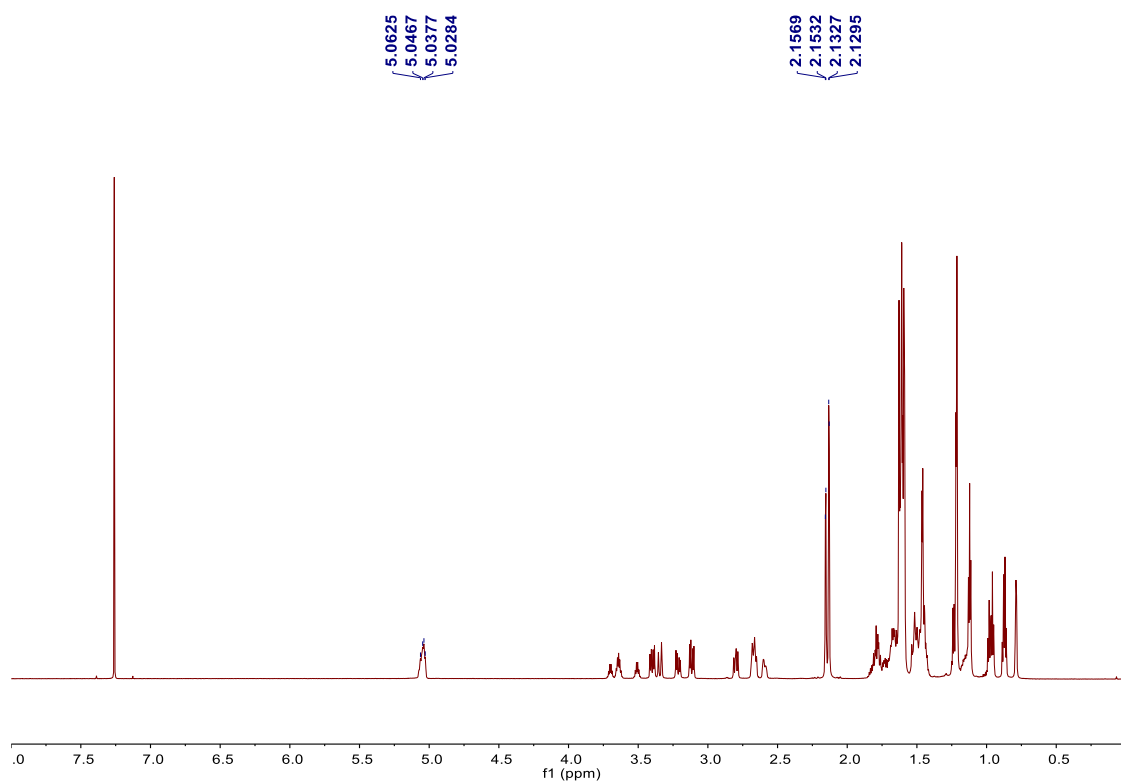

**Figure S8.**  $^1\text{H}$  NMR (800 MHz) spectrum of compound **1** (Recorded in  $\text{CDCl}_3$ , 280 K)

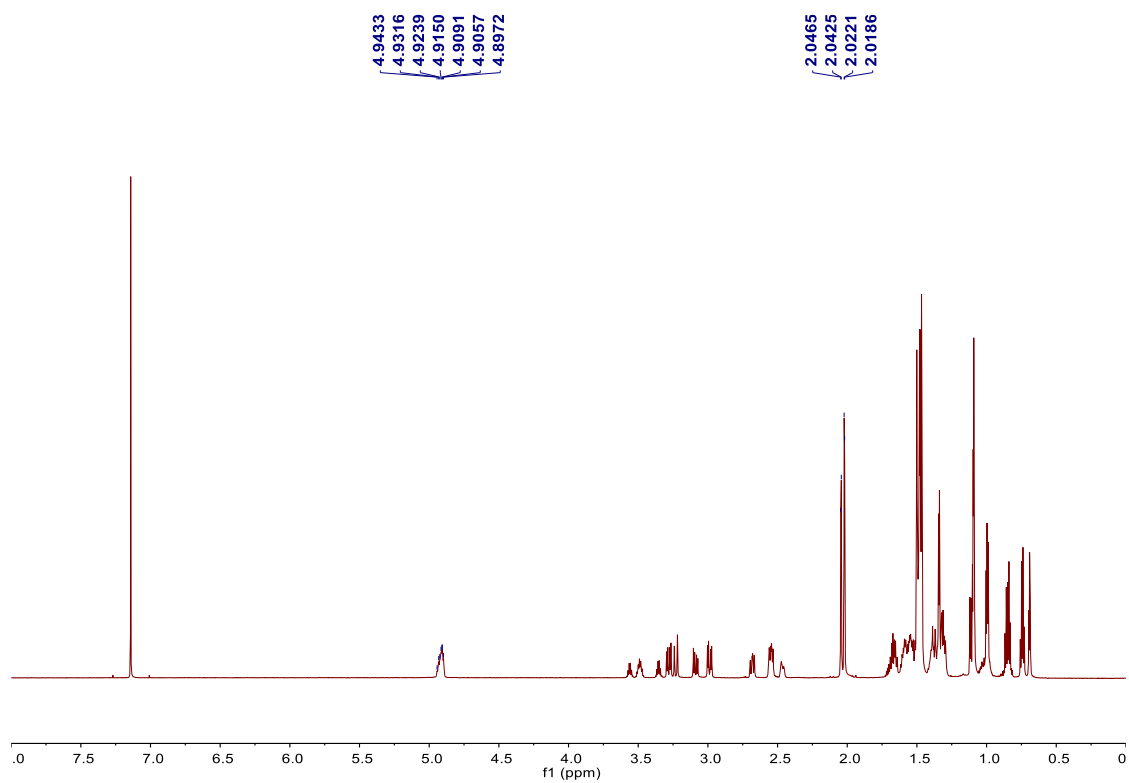

**Figure S9.**  $^1\text{H}$  NMR (600 MHz) spectrum of compound **1** (Recorded in  $\text{C}_5\text{D}_5\text{N}$ , 298 K)

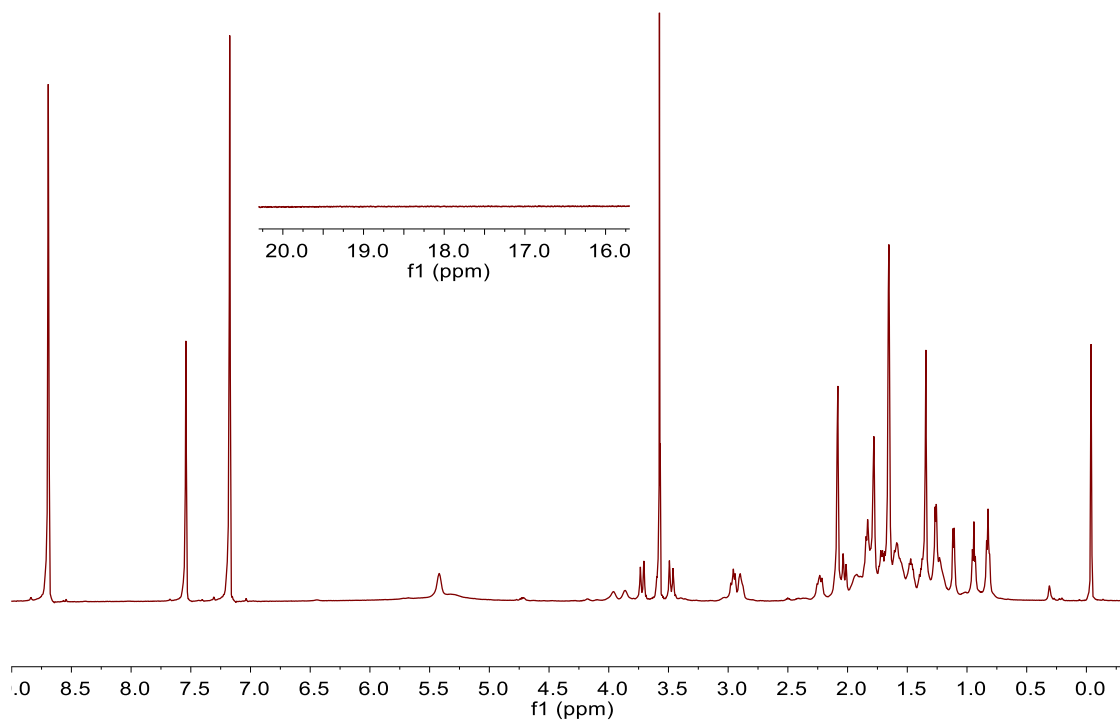

**Figure S10.**  $^1\text{H}$  NMR (600 MHz) spectrum of compound **1** (Recorded in  $\text{CDCl}_3$ , 313 K)

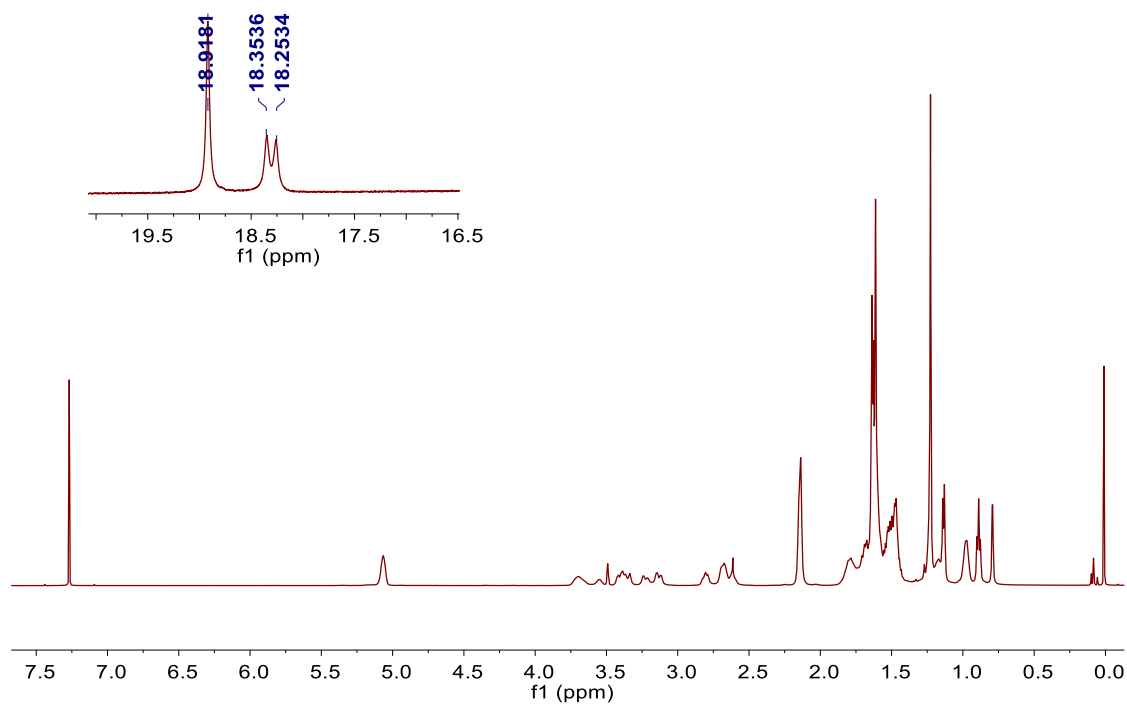

**Figure S11.**  $^1\text{H}$  NMR (600 MHz) spectrum of compound **1** (Recorded in  $\text{CDCl}_3$ , 298 K)

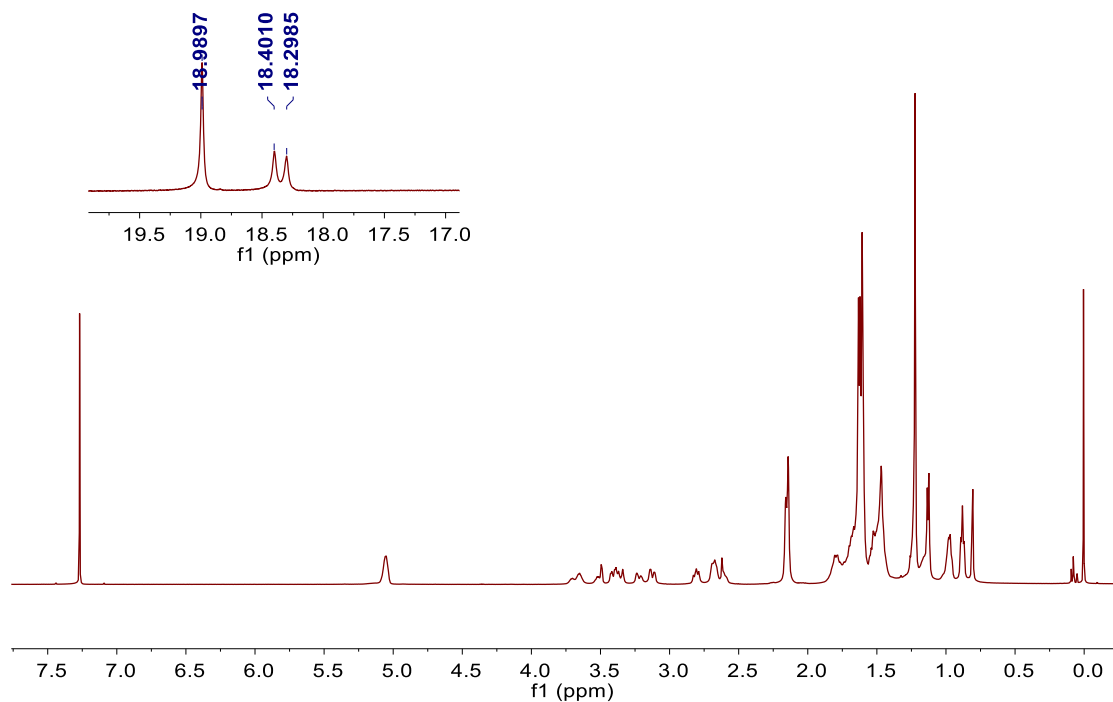

**Figure S12.** Key  $^1\text{H}$ - $^1\text{H}$  COSY (black bonds) and HMBC (arrows) correlations of compounds **2-3**.

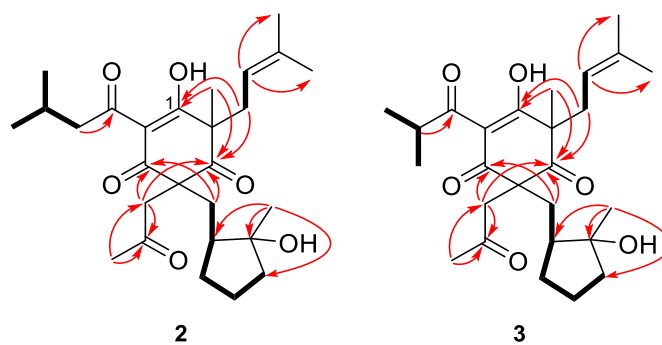

**Figure S13.**  $^1\text{H}$  NMR (600 MHz) spectrum of compound **2** (Recorded in  $\text{C}_5\text{D}_5\text{N}$ , 298 K)

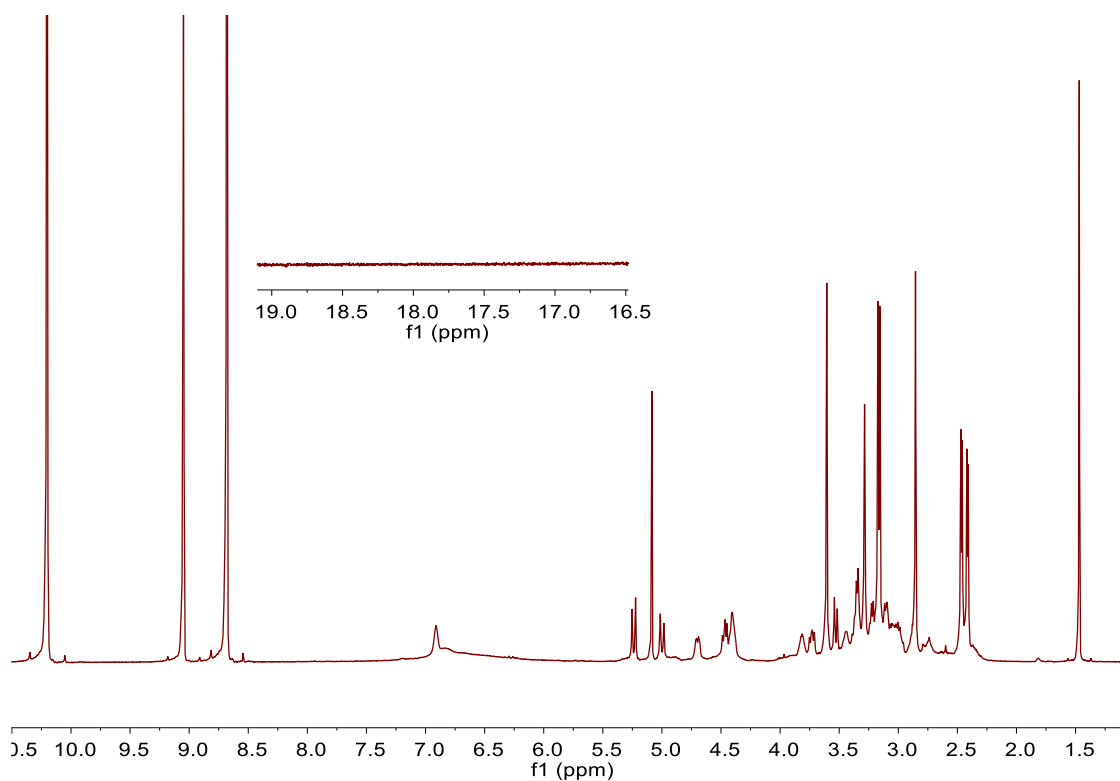

**Figure S14.**  $^1\text{H}$  NMR (600 MHz) spectrum of compound **3** (Recorded in  $\text{C}_5\text{D}_5\text{N}$ , 298 K)

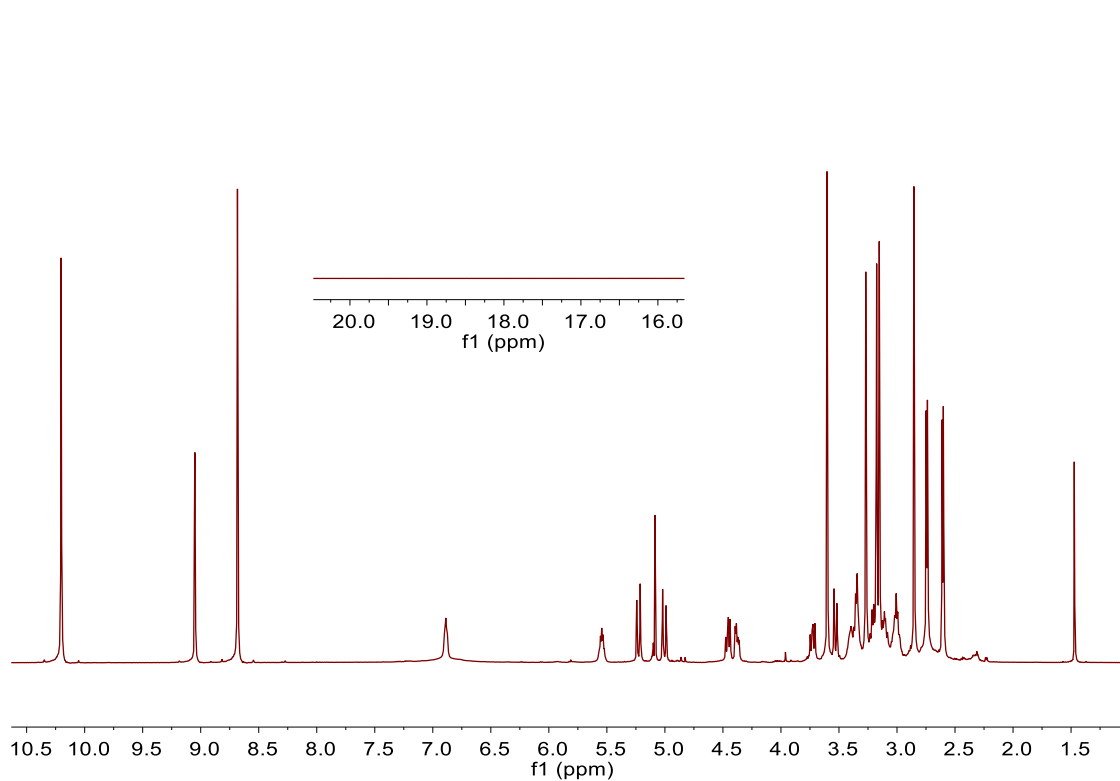

**Figure S15.**  $^1\text{H}$  NMR (600 MHz) spectrum of compound **2** (Recorded in  $\text{CDCl}_3$ , 313 K)

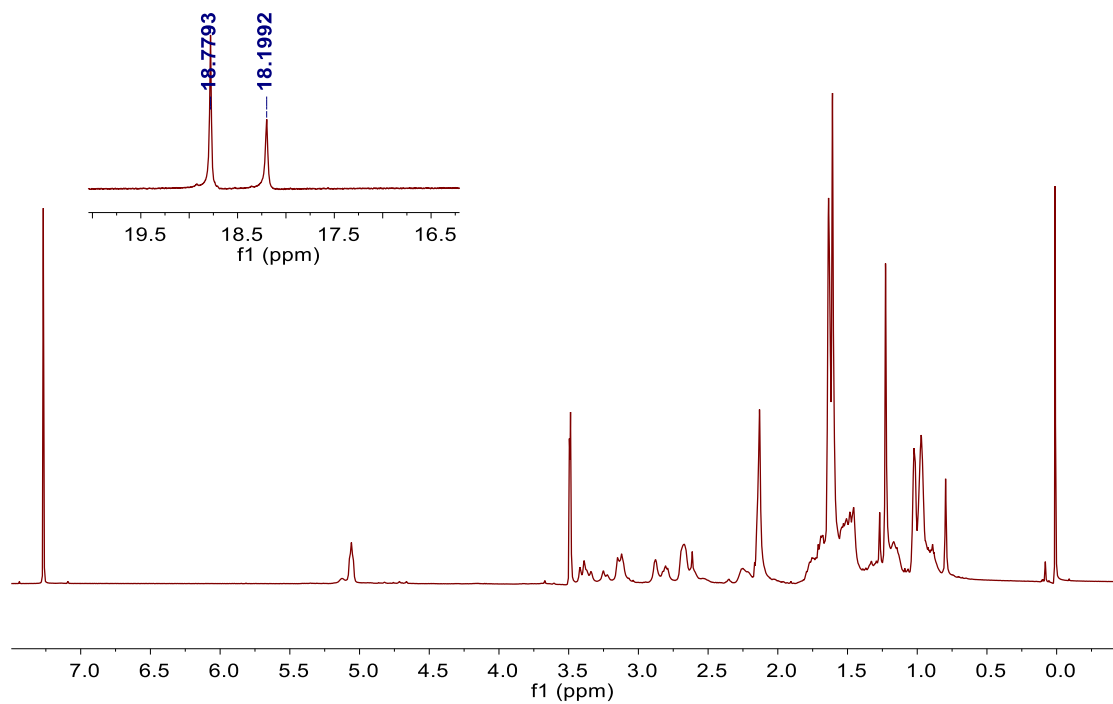

**Figure S16.**  $^1\text{H}$  NMR (600 MHz) spectrum of compound **2** (Recorded in  $\text{CDCl}_3$ , 298 K)

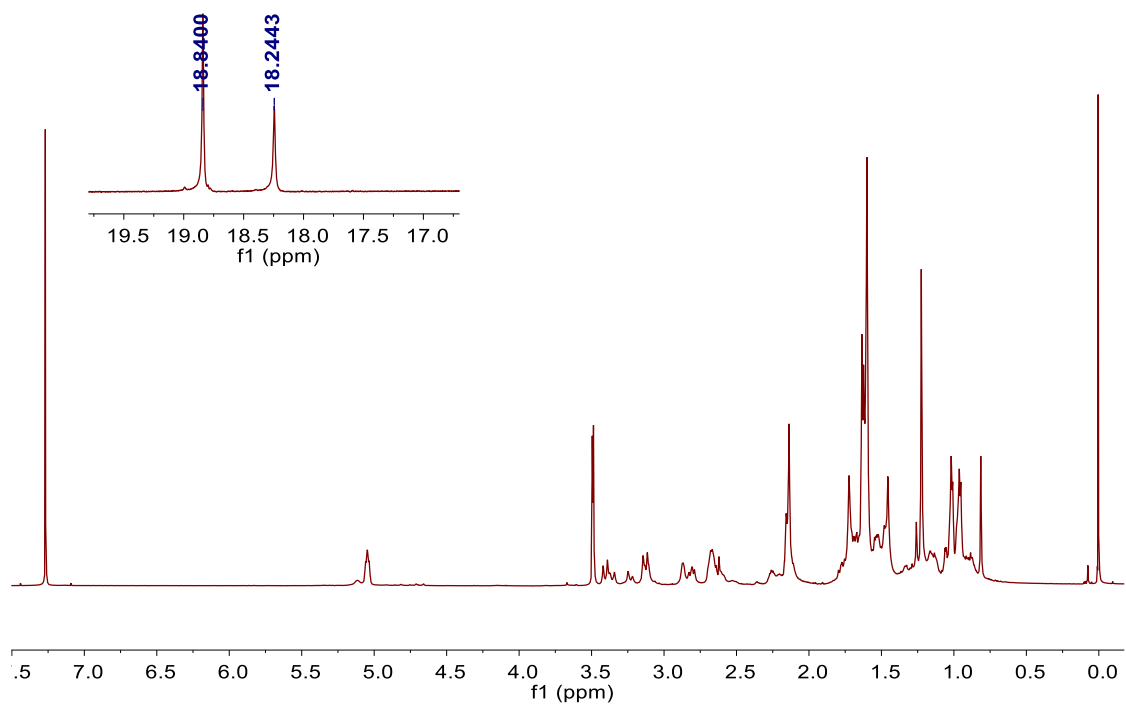

**Figure S17.**  $^1\text{H}$  NMR (600 MHz) spectrum of compound **3** (Recorded in  $\text{CDCl}_3$ , 313 K)

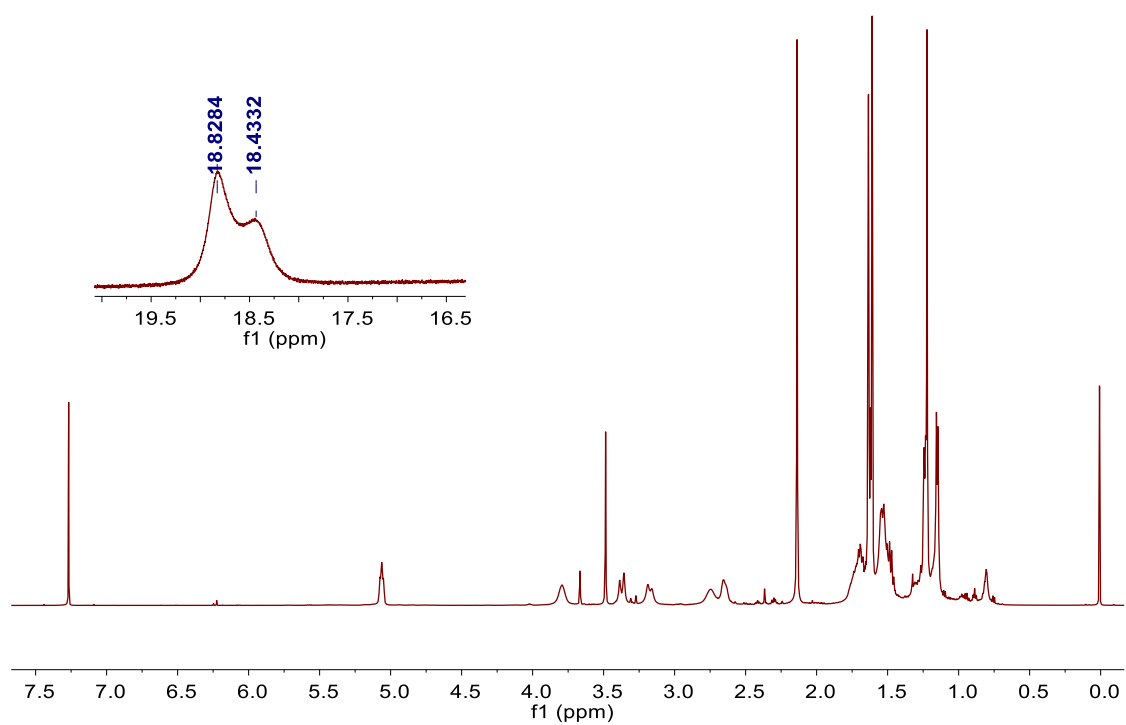

**Figure S18.**  $^1\text{H}$  NMR (600 MHz) spectrum of compound **3** (Recorded in  $\text{CDCl}_3$ , 298 K)

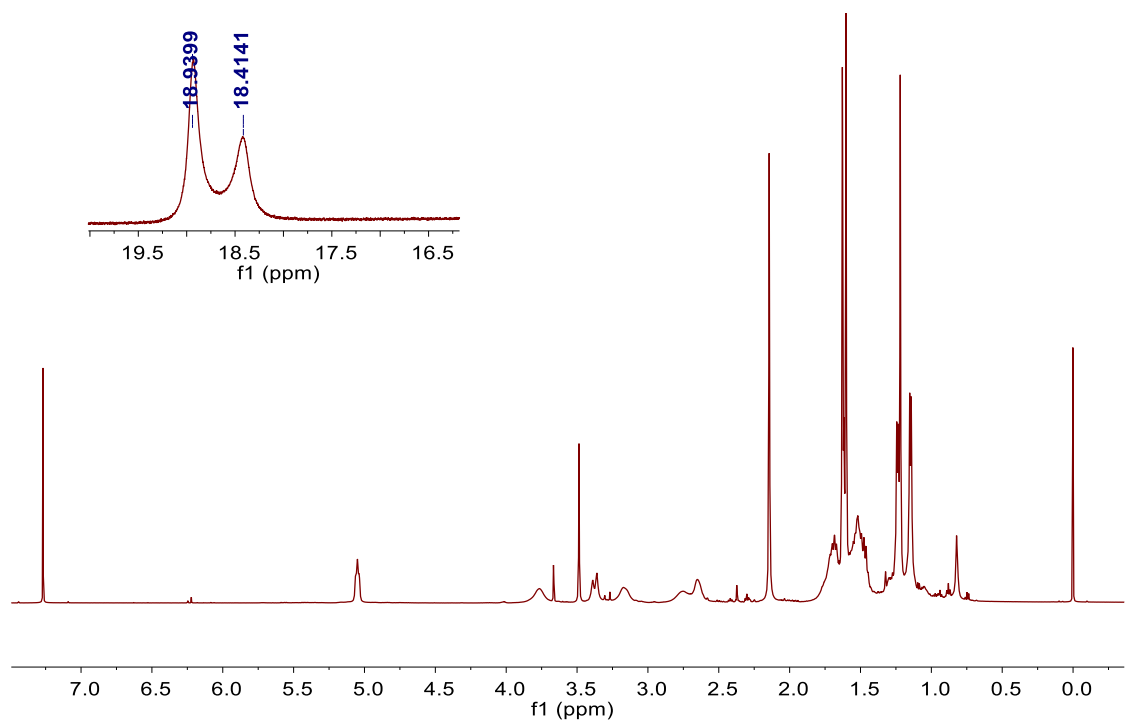

**Figure S19.** The mutual transformations of enol tautomers of compound **2**.

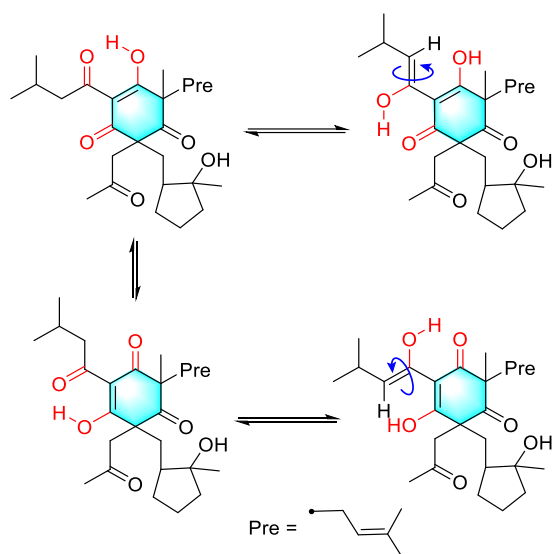

**Figure S20.** The mutual transformations of enol tautomers of compound **3**.

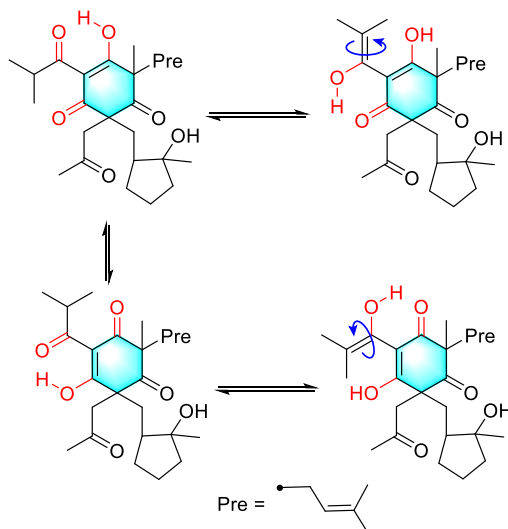

**Figure S21.** Experimental ECD spectra of **1–3**.

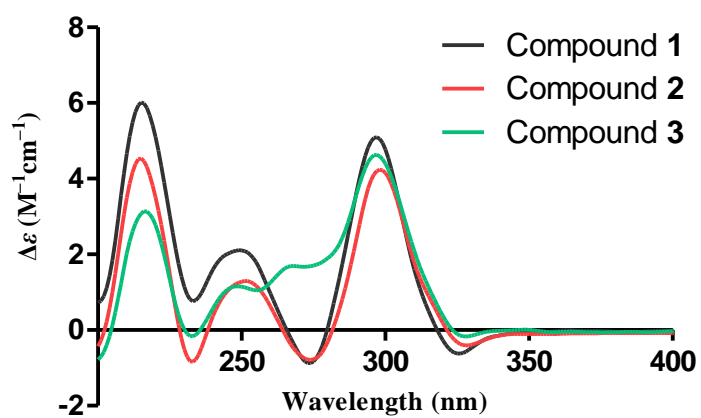



**Figure S22.**  $^1\text{H}$  NMR (600 MHz) spectrum of compound **1** (Recorded in  $\text{DMSO-}d_6$ , 298 K)

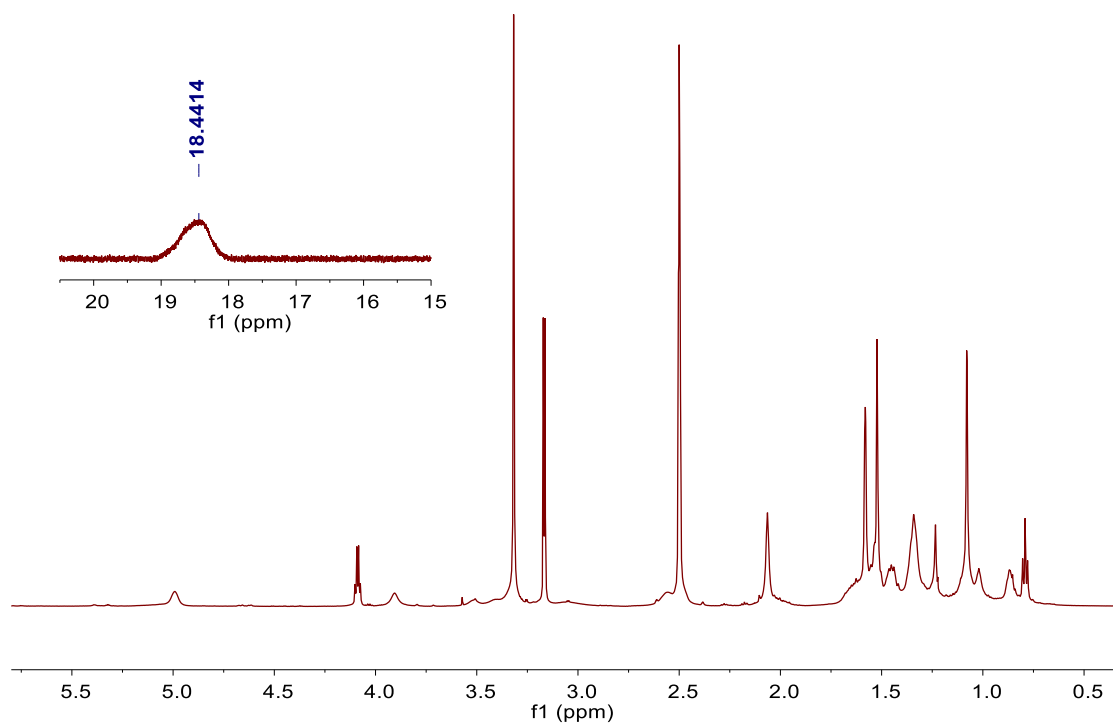

**Figure S23.**  $^1\text{H}$  NMR (600 MHz) spectrum of compound **2** (Recorded in  $\text{DMSO-}d_6$ , 298 K)

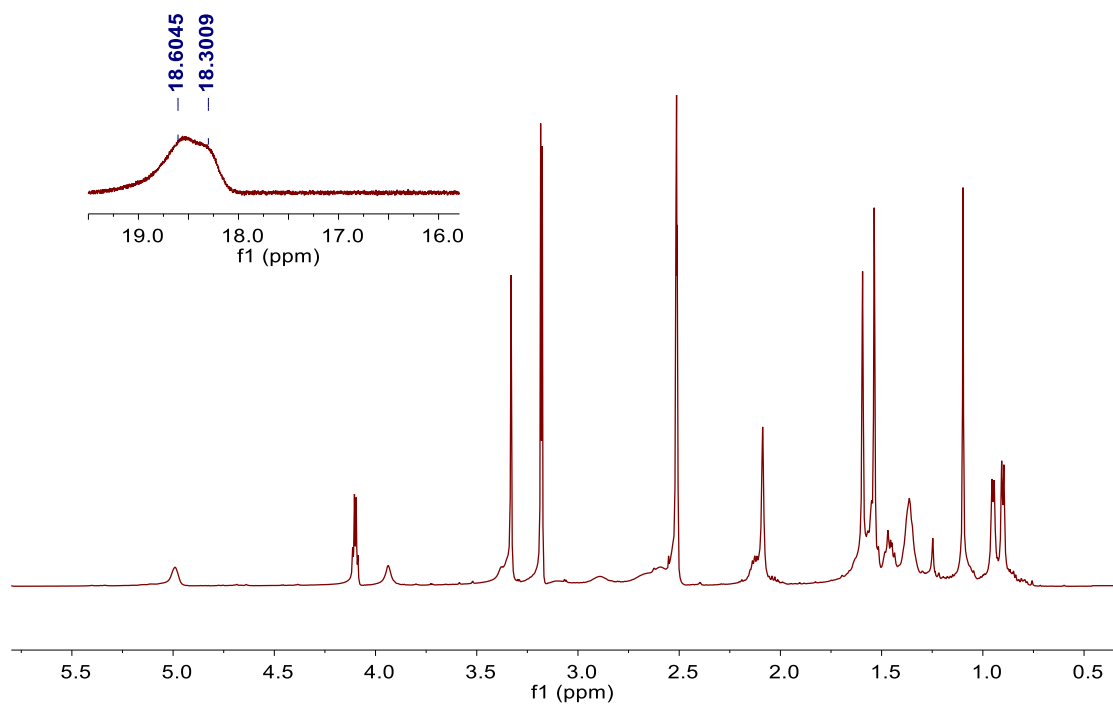

**Figure S24.**  $^1\text{H}$  NMR (600 MHz) spectrum of compound **3** (Recorded in  $\text{DMSO-}d_6$ , 298 K)

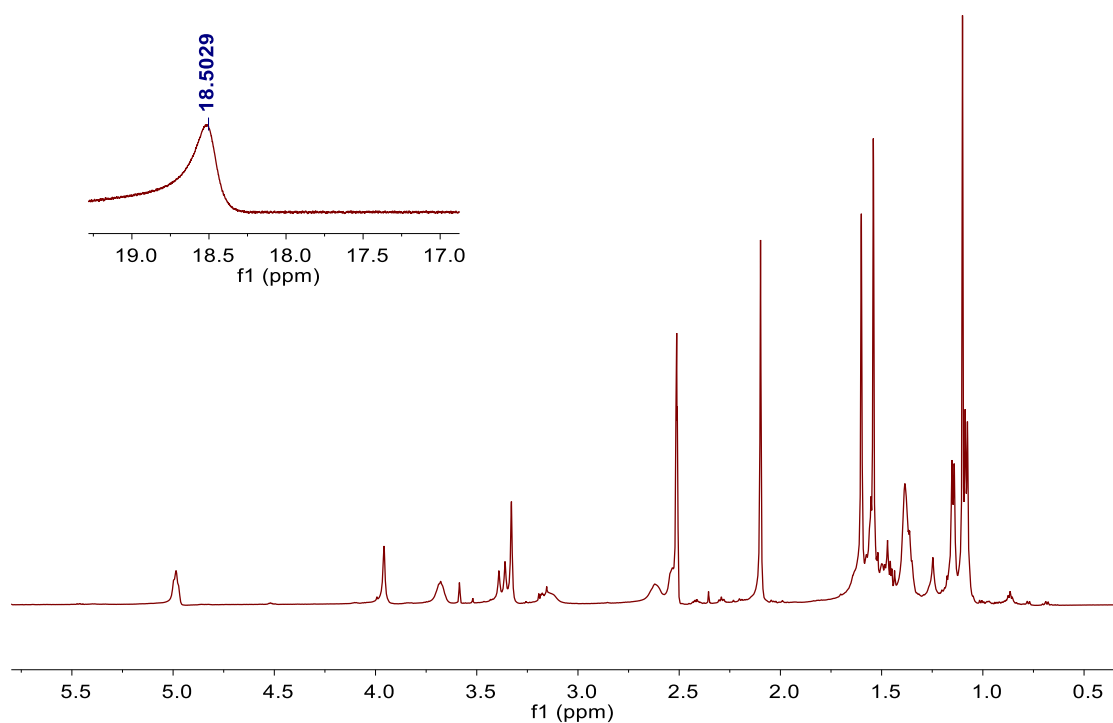

**Table S1** PPAPs with enolizable  $\beta,\beta'$ -triC or  $\beta$ -diC systems

| The PPAPs with enolizable $\beta,\beta'$ -tricarboxyl ( $\beta,\beta'$ -triC) systems |                                       |
|---------------------------------------------------------------------------------------|---------------------------------------|
| Numbers                                                                               | Name                                  |
| 1–6                                                                                   | hyperascyrones A–F <sup>1</sup>       |
| 7–10                                                                                  | hyperbeanols A–D <sup>2</sup>         |
| 11                                                                                    | chipericumun E <sup>3</sup>           |
| 12–14                                                                                 | sensinones A–C <sup>4</sup>           |
| 15–20                                                                                 | oblongifolin L, N–Q, T–U <sup>5</sup> |
| 21–24                                                                                 | oblongifolin AA, Z, V, L <sup>6</sup> |
| 25–28                                                                                 | oblongifolin A–D <sup>7</sup>         |
| 29                                                                                    | Oblongifolin E <sup>8</sup>           |
| 30–31                                                                                 | guttiferone I–J <sup>9</sup>          |
| 32                                                                                    | garcicowin B <sup>10</sup>            |
| 33–34                                                                                 | 6-epi-guttiferone J                   |
| 35–36                                                                                 | guttiferone K–L <sup>12</sup>         |
| 37–38                                                                                 | guttiferone O–P <sup>13</sup>         |
| 39                                                                                    | guttiferone G <sup>14</sup>           |

|       |                                    |
|-------|------------------------------------|
| 40–44 | guttiferone A–E <sup>15</sup>      |
| 45–47 | guttiferone M                      |
| 48–51 | 7-epi-garcinol                     |
| 52    | guttiferone Q <sup>18</sup>        |
| 53    | cowanone <sup>19</sup>             |
| 54    | garcimultiflorone K <sup>20</sup>  |
| 55–59 | Garcimultiflorone D–F              |
| 60–63 | garciesculentone B–E <sup>22</sup> |
| 64    | xanthochymol <sup>23</sup>         |
| 65    | laxifloranone <sup>24</sup>        |
| 66–67 | guttiferone H                      |
| 68–69 | guttiferone M–N <sup>26</sup>      |
| 70    | guttiferone F <sup>27</sup>        |
| 71    | campoginol <sup>28</sup>           |
| 72    | garcimultiflorone H <sup>29</sup>  |
| 73    | trijapin D <sup>30</sup>           |
| 74    | garcinielliptone HF <sup>31</sup>  |

---

**The PPAPs with enolizable  $\beta$ -dicarbonyl ( $\beta$ -diC) systems**

---

| Numbers | Name                             |
|---------|----------------------------------|
| 75      | nemorosone <sup>32</sup>         |
| 76      | Hydroxynemorosone <sup>32</sup>  |
| 77      | chamone I <sup>33</sup>          |
| 78      | chamone II <sup>33</sup>         |
| 79      | garcinialiptone D <sup>34</sup>  |
| 80–81   | hyperevolutin A–B <sup>35</sup>  |
| 82      | hyperibine J <sup>36</sup>       |
| 83      | Hyperfirin <sup>36</sup>         |
| 84      | Secohyperforin <sup>37</sup>     |
| 85      | Adsecohyperforin <sup>37</sup>   |
| 86      | garcinielliptone F <sup>38</sup> |

|       |                               |
|-------|-------------------------------|
| 87    | adhyperfirin <sup>39</sup>    |
| 88    | adhyperforin <sup>40</sup>    |
| 89-90 | prolifenone A–B <sup>41</sup> |
| 91    | enervosanone <sup>42</sup>    |

(1) Zhu, H.; Chen, C.; Liu, J.; Sun, B.; Wei, G.; Li, Y.; Zhang, J.; Yao, G.; Luo, Z.; Xue, Y.; Zhang, Y. Hyperascryones A–H, polyprenylated spirocyclic acylphloroglucinol derivatives from *Hypericum ascyron* Linn. *Phytochemistry*. **2015**, *115*, 222–230.

(2) Chen, X. Q.; Li, Y.; Li, K. Z.; Peng, L. Y.; He, J.; Wang, K.; Pan, Z. H.; Cheng, X.; Li, M. M.; Zhao, Q. S. Spirocyclic acylphloroglucinol derivatives from *Hypericum beanii*. *Chem. Pharm. Bull.* **2011**, *59*, 1250–1253.

(3) Tala, M. F.; Talontsi, F. M.; Zeng, G. Z.; Wabo, H. K.; Tan, N. H.; Spitteller, M.; Tane, P. Antimicrobial and cytotoxic constituents from native Cameroonian medicinal plant *Hypericum riparium*. *Fitoterapia*. **2015**, *102*, 149–155.

(4) Magadula, J. J.; Kapingu, M. C.; Bezabih, M.; Abegaz, B. M. Polyisoprenylated benzophenones from *Garcinia semseii* (Clusiaceae). *Phytochemistry Lett.* **2008**, *1*, 215–218.

(5) Zhang, H.; Tao, L.; Fu, W. W.; Liang, S.; Yang, Y. F.; Yuan, Q. H.; Yang, D. J.; Lu, A. P.; Xu, H. X. Prenylated benzoylphloroglucinols and xanthenes from the leaves of *Garcinia oblongifolia* with antienteroviral activity. *J. Nat. Prod.* **2014**, *77*, 1037–1046.

(6) Zhang, H.; Zheng, D.; Ding, Z. J.; Lao, Y. Z.; Tan, H. S.; Xu, H. X. UPLC-PDA-QTOFMS-guided isolation of prenylated xanthenes and benzoylphloroglucinols from the leaves of *Garcinia oblongifolia* and their migration-inhibitory activity. *Sci. rep.* **2016**, *6*, 35789.

(7) Wafaa, H.; Solenn, B.; Florence, M. B.; Odile, T.; Stéphane, M.; Bernard, D.; Van Hung, N.; Thierry, S.; Christian, M. Oblongifolins A–D, polyprenylated benzoylphloroglucinol derivatives from *Garcinia oblongifolia*. *J. Nat. Prod.* **2006**, *69*, 774–777.

(8) Huang, S. X.; Feng, C. Y.; Xu, G.; Han, Q. B.; Qiao, C. F.; Chang, D. C.; Luo, K. Q.; Xu, H. X. Bioassay-guided isolation of xanthenes and polycyclic prenylated acylphloroglucinols from *Garcinia oblongifolia*. *J. Nat. Prod.* **2009**, *72*, 130–135.

(9) Merza, J.; Mallet, S.; Litaudon, M.; Dumontet, V.; Séraphin, D.; Richomme, P. New cytotoxic guttiferone analogues from *Garcinia virgata* from New Caledonia. *Planta Med.* **2006**, *72*, 87–89.

(10) Xu, G.; Kan, W. L.; Zhou, Y.; Song, J. Z.; Han, Q. B.; Qiao, C. F.; Cho, C. H.; Rudd, J. A.; Lin, G.; Xu, H. X. Cytotoxic acylphloroglucinol derivatives from the twigs of *Garcinia cowa*. *J. Nat. Prod.* **2010**, *73*, 104–108.

(11) Acuna, U. M.; Figueroa, M.; Kavalier, A.; Jancovski, N.; Basile, M. J.; Kennelly, E. J. Benzophenones and biflavonoids from *Rheedia edulis*. *J. Nat. Prod.* **2010**, *73*, 1775–1579.

(12) Cao, S.; Brodie, P. J.; Miller, J. S.; Ratovoson, F.; Birkinshaw, C.; Randrianasolo, S.; Rakotobe, E.; Rasamison, V. E.; Kingston, D. G. Guttiferones K and L, antiproliferative compounds of *Rheedia calcicola* from the Madagascar rain forest. *J. Nat. Prod.* **2007**, *70*, 686–688.

(13) Carroll, A. R.; Suraweera, L.; King, G.; Rali, T.; Quinn, R. J. Guttiferones O and P, prenylated benzophenone MAPKAPK-2 inhibitors from *Garcinia solomonensis*. *J. Nat. Prod.* **2009**, *72*, 1699–1701.

(14) Williams, R. B.; Hoch, J.; Glass, T. E.; Evans, R.; Miller, J. S.; Wisse, J. H.; Kingston, D. G. A novel cytotoxic guttiferone analogue from *Garcinia macrophylla* from the Suriname rainforest *Planta Med.* **2003**, *69*, 864–866.

(15) Gustafson, K. R.; Blunt, J. W.; Munro, M. H.; Fuller, R. W.; McKee, T. C.; Cardellina II, J. H.; McMahan, J. B.; Cragg, G. M.; Boyd, M. R. The guttiferones, HIV-inhibitory benzophenones from *Symphonia globulifera*,

*Garcinia livingstonei*, *Garcinia ovalifolia* and *Clusia rosea*. *Tetrahedron*. **1992**, *48*, 10093–10102.

(16) Masullo, M.; Menegazzi, M.; Di Micco, S.; Beffy, P.; Bifulco, G.; Dal Bosco, M.; Novelli, M.; Pizza, C.; Masiello, P.; Piacente, S. Direct interaction of garcinol and related polyisoprenylated benzophenones of *Garcinia cambogia* fruits with the transcription factor STAT-1 as a likely mechanism of their inhibitory effect on cytokine signaling pathways. *J. Nat. Prod.* **2014**, *77*, 543–549.

(17) Marti, G.; Eparvier, V.; Moretti, C.; Susplugas, S.; Prado, S.; Grellier, P.; Retailleau, P.; Guéritte, F.; Litaudon, M. Antiplasmodial benzophenones from the trunk latex of *Moronobea coccinea* (Clusiaceae). *Phytochemistry*. **2009**, *70*, 75–85.

(18) Nguyen, H. D.; Trinh, B. T.; Nguyen, L. H. D. Guttiferones QS, cytotoxic polyisoprenylated benzophenones from the pericarp of *Garcinia cochinchinensis*. *Phytochemistry lett.* **2011**, *4*, 129–133.

(19) Trisuwan, K.; Ritthiwigrom, T. Benzophenone and xanthone derivatives from the inflorescences of *Garcinia cowa*. *Arch Pharm Res.* **2012**, *35*, 1733–1738.

(20) Cheng, L. Y.; Chen, C. L.; Kuo, Y. H.; Chang, T. H.; Lin, I. W.; Wang, S. W.; Chung, M. I.; Chen, J. J. Polyisoprenylated polycyclic acylphloroglucinol: Angiogenesis inhibitor from *Garcinia multiflora*. *Bioorg. med. chem. lett.* **2018**, *28*, 1860–1863.

(21) Liu, X.; Yu, T.; Gao, X. M.; Zhou, Y.; Qiao, C. F.; Peng, Y.; Chen, S. L.; Luo, K. Q.; Xu, H. X. Apoptotic effects of polyisoprenylated benzoylphloroglucinol derivatives from the twigs of *Garcinia multiflora*. *J. Nat. Prod.* **2010**, *73*, 1355–1359.

(22) Zhang, H.; Zhang, D. D.; Lao, Y. Z.; Fu, W. W.; Liang, S.; Yuan, Q. H.; Yang, L.; Xu, H. X. Cytotoxic and anti-inflammatory prenylated benzoylphloroglucinols and xanthones from the twigs of *Garcinia esculenta*. *J. Nat. Prod.* **2014**, *77*, 1700–1707.

(23) Ba, F. U.; Ramirez-Apan, T.; Cardenas, J. Polyisoprenylated benzophenones in *Cuban propolis*; Biological activity of nemorosone. *Z Naturforsch C.* **2002**, *57*, 372–378.

(24) Bokesch, H.; Groweiss, A.; Te; Boyd, M. Laxifloranone, a new phloroglucinol derivative from *Marila laxiflora*. *J. Nat. Prod.* **1999**, *62*, 1197–1199.

(25) Baggett, S.; Protiva PMazzola, E. P.; Yang, H.; Ressler, E. T.; Basile, M. J.; Weinstein, I. B.; Kennelly, E. J. Bioactive benzophenones from *Garcinia xanthochymus* fruits. *J. Nat. Prod.* **2005**, *68*, 354–360.

(26) Milena, M.; Carla, B.; Hisanori, S.; Cosimo, P.; Sonia, P. Polyisoprenylated benzophenones and an unusual polyisoprenylated tetracyclic xanthone from the fruits of *Garcinia cambogia*. *J. Agric. Food Chem.* **2008**, *56*, 5205–5210.

(27) Fuller, R. W.; Blunt, J. W.; Boswell, J. L.; Cardellina, J. H.; Boyd, M. R. Guttiferone F, the first prenylated benzophenone from *Allanblackia stuhlmannii*. *J. Nat. Prod.* **1999**, *62*, 130–132.

(28) Rao, A. R.; Venkatswamy, G.; Pendse, D. Camboginol and cambogin. *Tetrahedron Lett.* **1980**, *21*, 1975–1978.

(29) Fu, W.; Wu, M.; Zhu, L.; Lao, Y.; Wang, L.; Tan, H.; Yuan, Q.; Xu, H. Prenylated benzoylphloroglucinols and biphenyl derivatives from the leaves of *Garcinia multiflora* Champ. *RSC Adv.* **2015**, *5*, 78259–78267.

(30) Oya, A.; Tanaka, N.; Kusama, T.; Kim, S. Y.; Hayashi, S.; Kojoma, M.; Hishida, A.; Kawahara, N.; Sakai, K.; Gono, T.; Kobayashi, J. Prenylated benzophenones from *Triadenum japonicum*. *J. Nat. Prod.* **2015**, *78*, 258–264.

(31) Wu, C.; Lu, Y.; Bl; Yang, S.; Won, S.; Lin, C. Phloroglucinols with prooxidant activity from *Garcinia subelliptica*. *J. Nat. Prod.* **2008**, *71*, 246–250.

(32) de Oliveira, C. M.; Porto, A.; Bittrich, V.; Vencato, I.; Marsaioli, A. J. Floral resins of *Clusia* spp.: chemical composition and biological function. *Tetrahedron Lett.* **1996**, *37*, 6427–6430.

(33) Lokvam, J.; Braddock, J. F.; Reichardt, P. B.; Clausen, T. P. Two polyisoprenylated benzophenones from

the trunk latex of *Clusia grandiflora* (Clusiaceae). *Phytochemistry*. **2000**, *55*, 29–34.

(34) Zhang, L. J.; Chiou, C. T.; Cheng, J. J.; Huang, H. H.; Ming, L.; Kuo, Y.; Liao, C. C.; Bastow, K. F.; Lee, K. H.; Kuo, Y. H., K. Cytotoxic polyisoprenyl benzophenonoids from *Garcinia subelliptica*. *J. Nat. Prod.* **2010**, *73*, 557–562.

(35) Decosterd, L. A.; Stoeckli-Evans, H.; Chapuis, J. C.; Msonthi, J. D.; Sordat, B.; Hostettmann, K. New Hyperforin Derivatives from *Hypericum revolutum* V AHL with Growth-Inhibitory Activity against a Human Colon Carcinoma Cell Line. *Helv. Chim. Acta.* **1989**, *20*, 464–471.

(36) Tatsis, E. C.; Sjeff, B.; Vassiliki, E.; Troganis, A. N.; Jacques, V.; Gerothanassis, I. P. Identification of the major constituents of *Hypericum perforatum* by LC/SPE/NMR and/or LC/MS. *Phytochemistry*. **2007**, *68*, 383–393.

(37) Charchoglyan, A.; Abrahamyan, A.; Fujii, I.; Boubakir, Z.; Gulder, T. A.; Kutchan, T. M.; Vardapetyan, H.; Bringmann, G.; Ebizuka, Y.; Beerhues, L. Differential accumulation of hyperforin and secohyperforin in *Hypericum perforatum* tissue cultures. *Phytochemistry*. **2007**, *68*, 2670–2677.

(38) Weng, J. R.; Lin, C. N.; Tsao, L. T.; Wang, J. P. Novel and anti-inflammatory constituents of *Garcinia subelliptica*. *Chem. Eur. J.* **2003**, *9*, 1958–1963.

(39) Porzel, A.; Farag, M. A.; Mülbradt, J.; Wessjohann, L. A. Metabolite profiling and fingerprinting of *Hypericum* species: a comparison of MS and NMR metabolomics. *Metabolomics*. **2014**, *10*, 574–588.

(40) Maisenbacher, P.; Kovar, K.-A. Adhyperforin: a homologue of hyperforin from *Hypericum perforatum*. *Planta Med.* **1992**, *58*, 291–293.

(41) Henry, G. E.; Raithore, S.; Zhang, Y.; Jayaprakasam, B.; Nair, M. G.; Heber, D.; Seeram, N. P. Acylphloroglucinol derivatives from *Hypericum prolificum*. *J. Nat. Prod.* **2006**, *69*, 1645–1648.

(42) Taher, M.; Idris, M. S.; Ahmad, F.; Arbain, D. A polyisoprenylated ketone from *Calophyllum enervosum*. *Phytochemistry*. **2005**, *66*, 723–726.

**Table S2** Antibacterial activities of compounds **1–3** with MIC<sub>50</sub> Values ± SD (μM)

|                         | <i>Escherichia coli</i><br>ATCC25922 | <i>Pseudomonas</i><br><i>aeruginosa</i><br>ATCC27853 | Staphylococcus aureus<br>subsp. Aureus<br>ATCC29213 | <i>Salmonella enterica</i><br>subsp. enterica<br>ATCC14028 |
|-------------------------|--------------------------------------|------------------------------------------------------|-----------------------------------------------------|------------------------------------------------------------|
| <b>1</b>                | ..b                                  | ..b                                                  | ..b                                                 | ..b                                                        |
| <b>2</b>                | ..b                                  | ..b                                                  | 11.24 ± 0.04                                        | ..b                                                        |
| <b>3</b>                | ..b                                  | ..b                                                  | 70.76 ± 1.92                                        | ..b                                                        |
| Penicillin <sup>a</sup> | ..b                                  | ..b                                                  | 0.533 ± 0.03                                        | ..b                                                        |

<sup>a</sup>Penicillin was used as positive control.  
<sup>b</sup>not detected (practical limit of detection).

**Figure S25.**  $^1\text{H}$  NMR (400 MHz) spectrum of compound **1** (Recorded in  $\text{C}_5\text{D}_5\text{N}$ , 298 K).

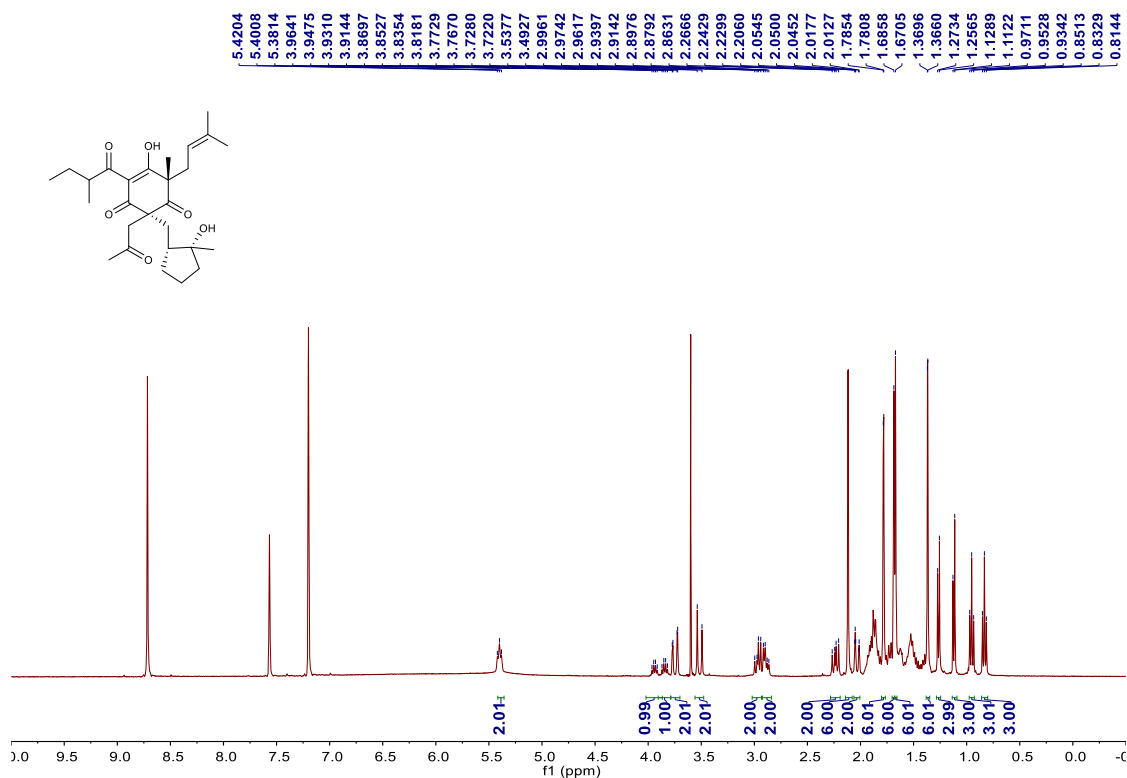

**Figure S26.**  $^{13}\text{C}$  NMR (100 MHz) spectrum of compound **1** (Recorded in  $\text{C}_5\text{D}_5\text{N}$ , 298 K)

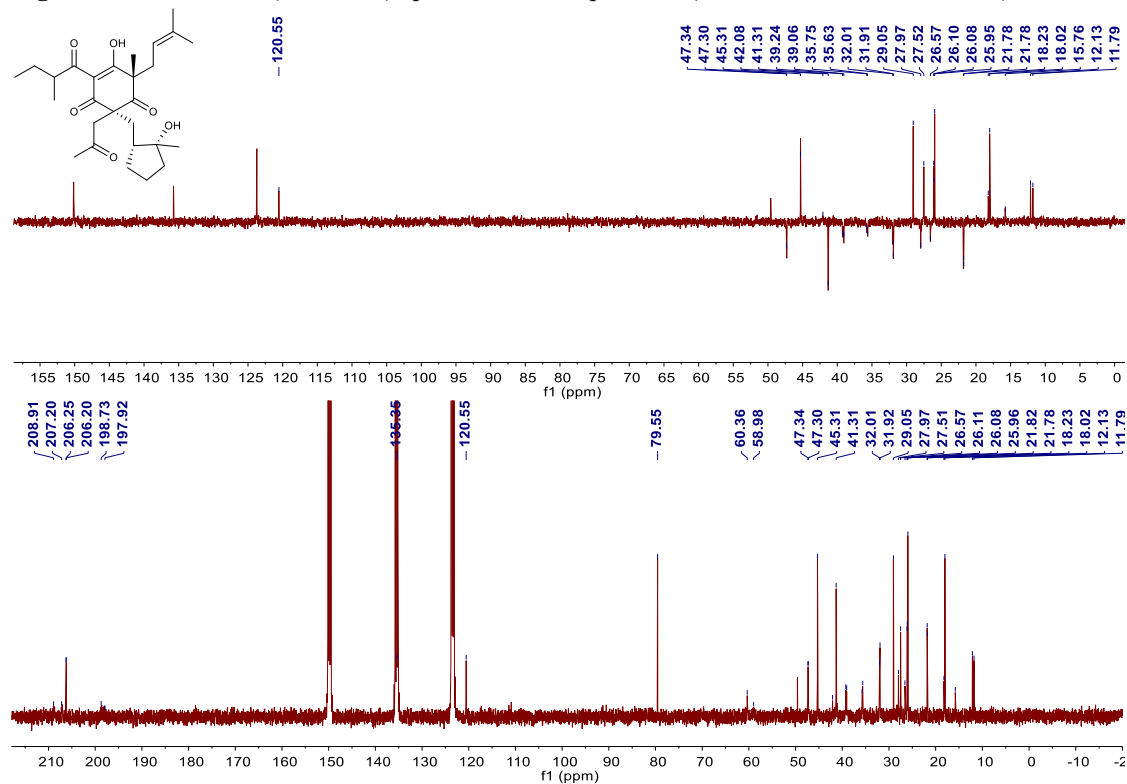

Figure S27. HSQC spectrum of compound **1** (Recorded in C<sub>5</sub>D<sub>5</sub>N, 298 K)

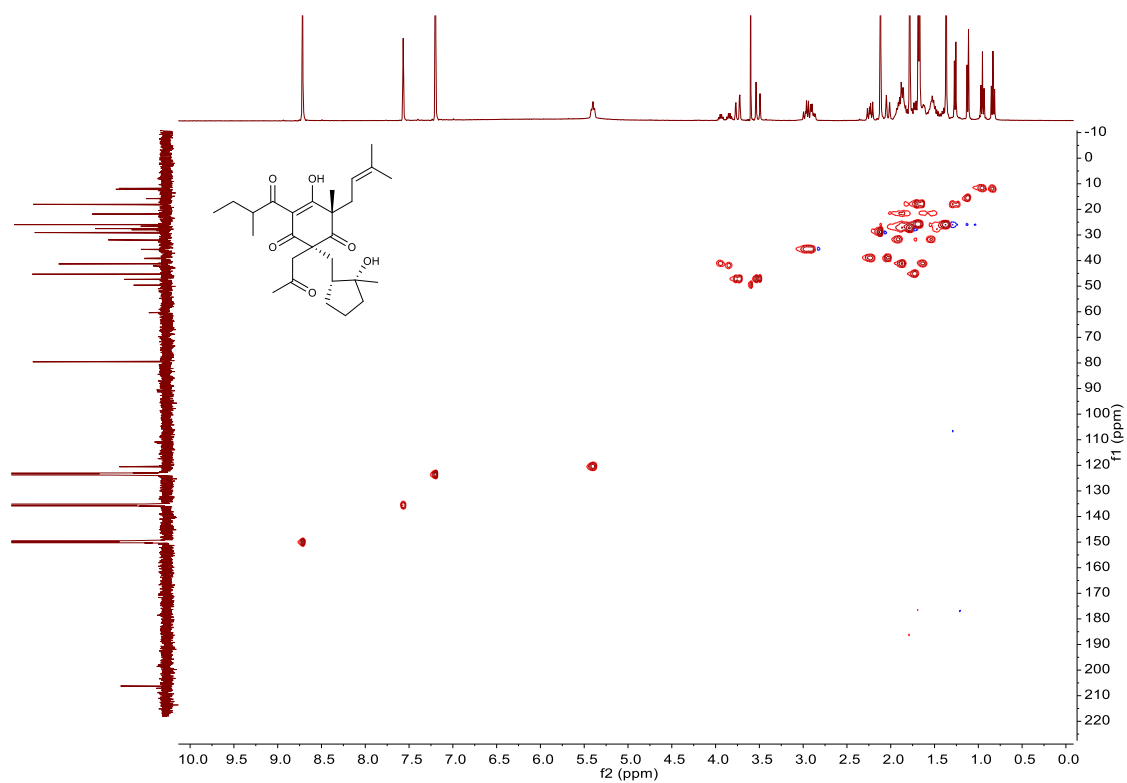

Figure S28. <sup>1</sup>H-<sup>1</sup>H COSY spectrum of compound **1** (Recorded in C<sub>5</sub>D<sub>5</sub>N, 298 K)

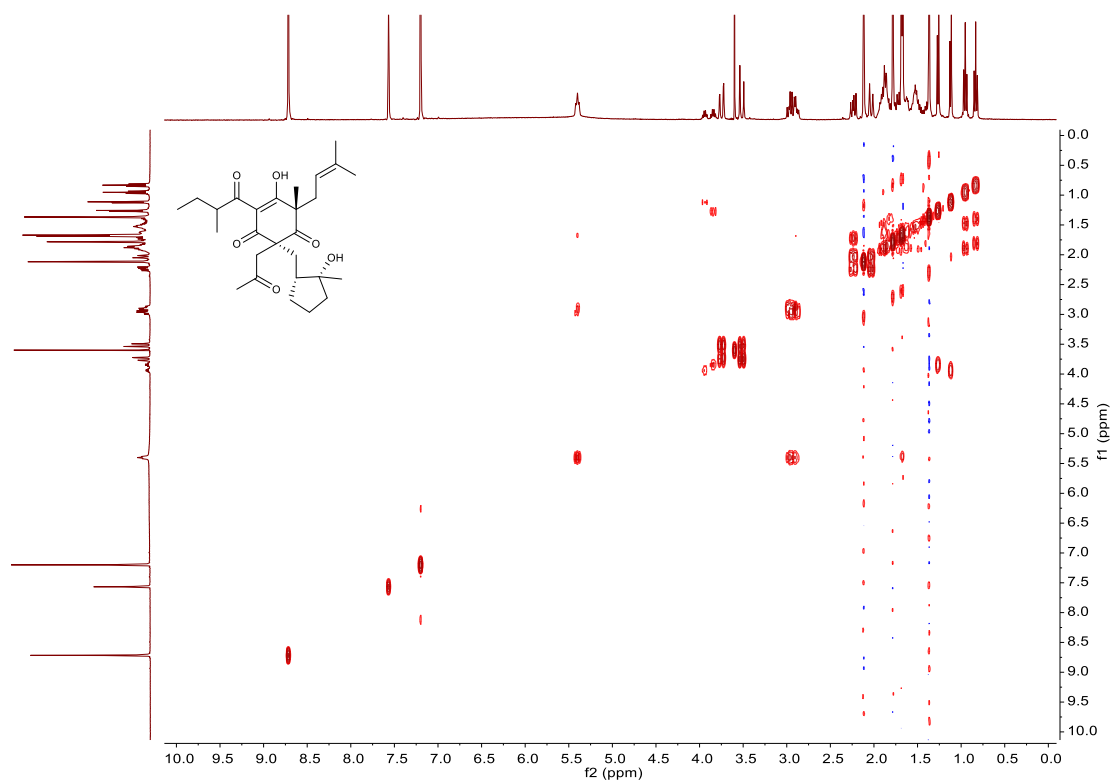



Figure S29. HMBC spectrum of compound **1** (Recorded in C<sub>5</sub>D<sub>5</sub>N, 298 K)

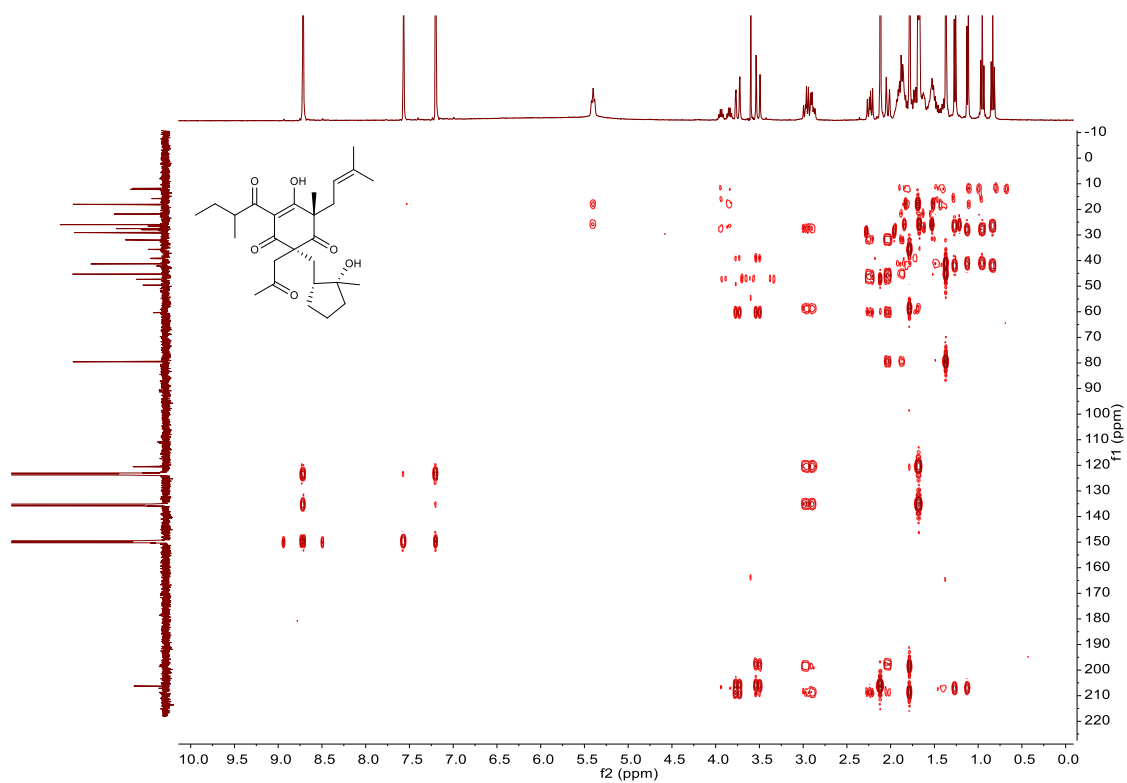

Figure S30. NOESY spectrum of compound **1** (Recorded in C<sub>5</sub>D<sub>5</sub>N, 298 K)

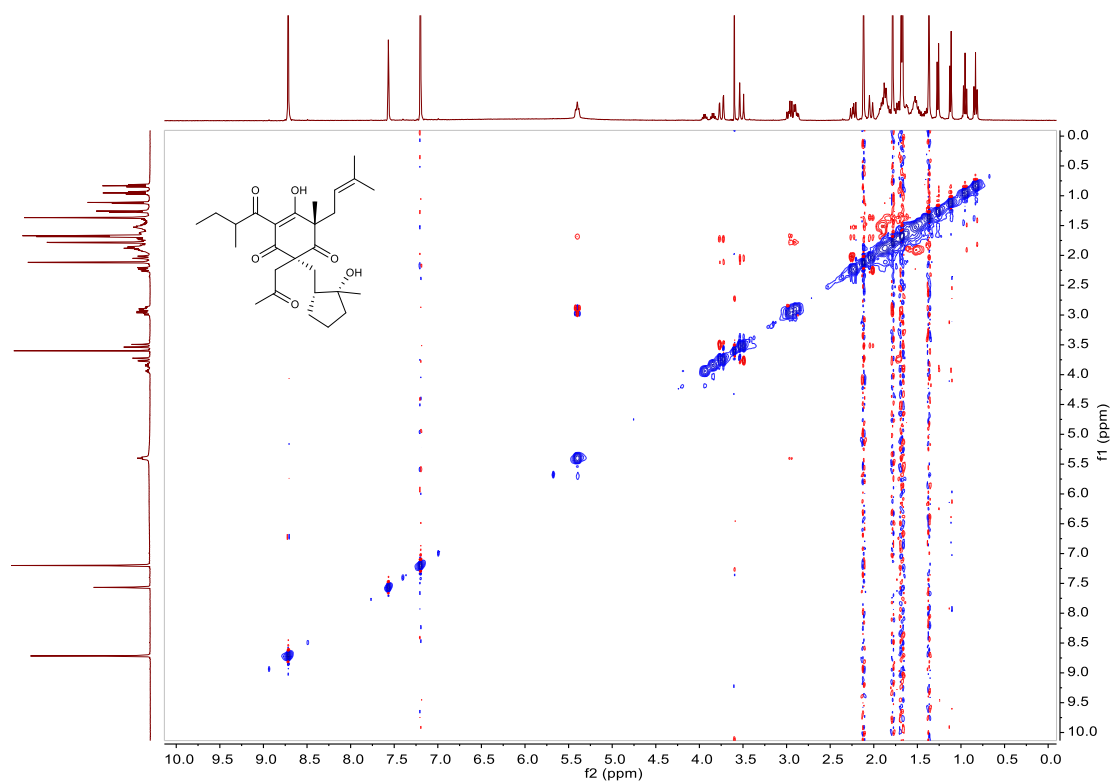

**Figure S31.** HRESIMS of compound **1**.

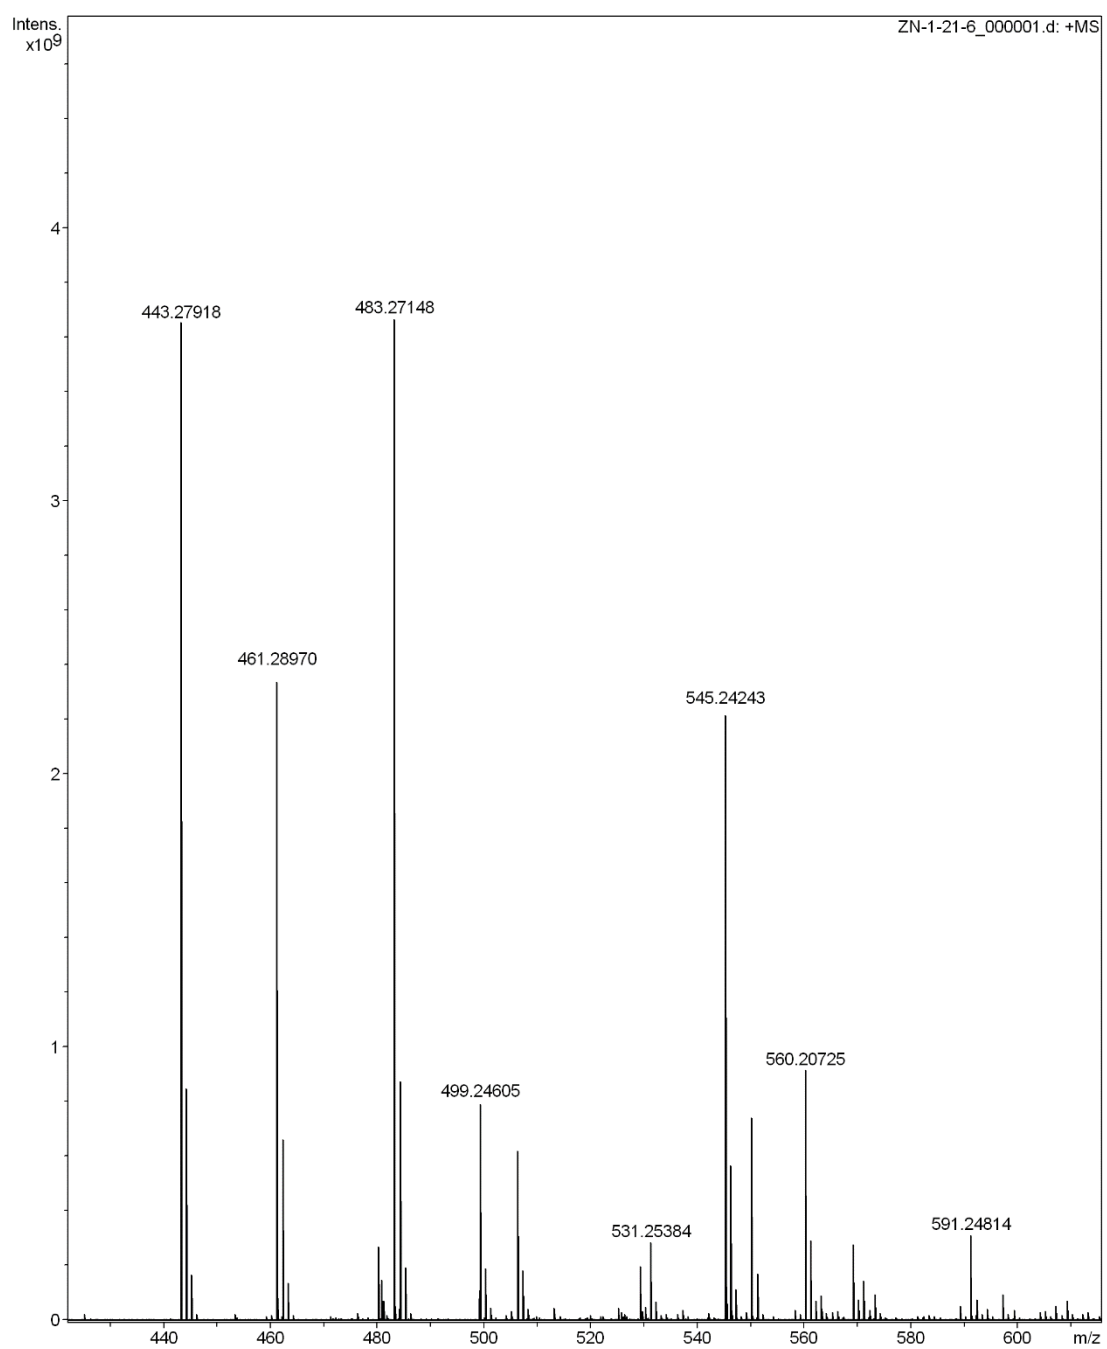

**Figure S32.** UV spectrum of compound **1**

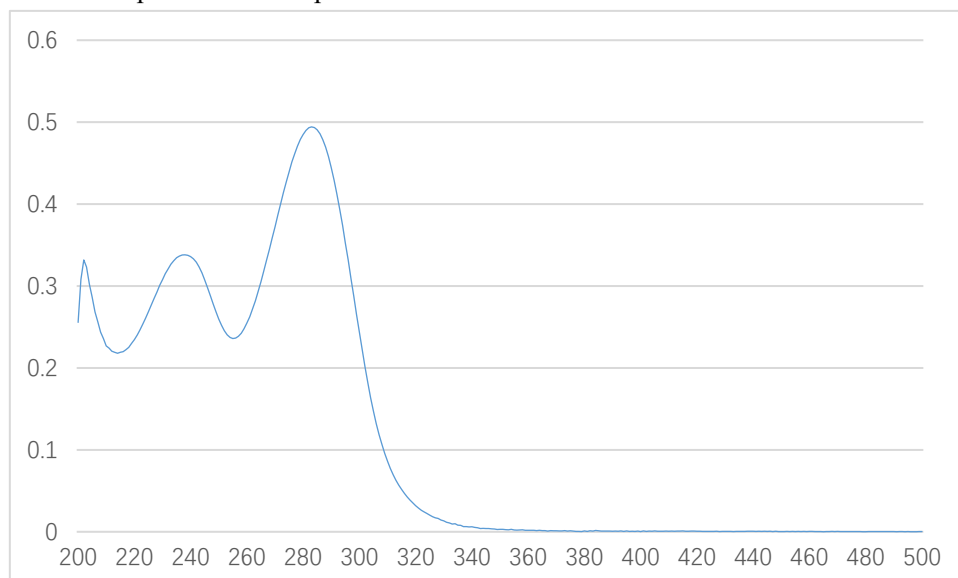

**Figure S33.** IR spectrum of compound **1**

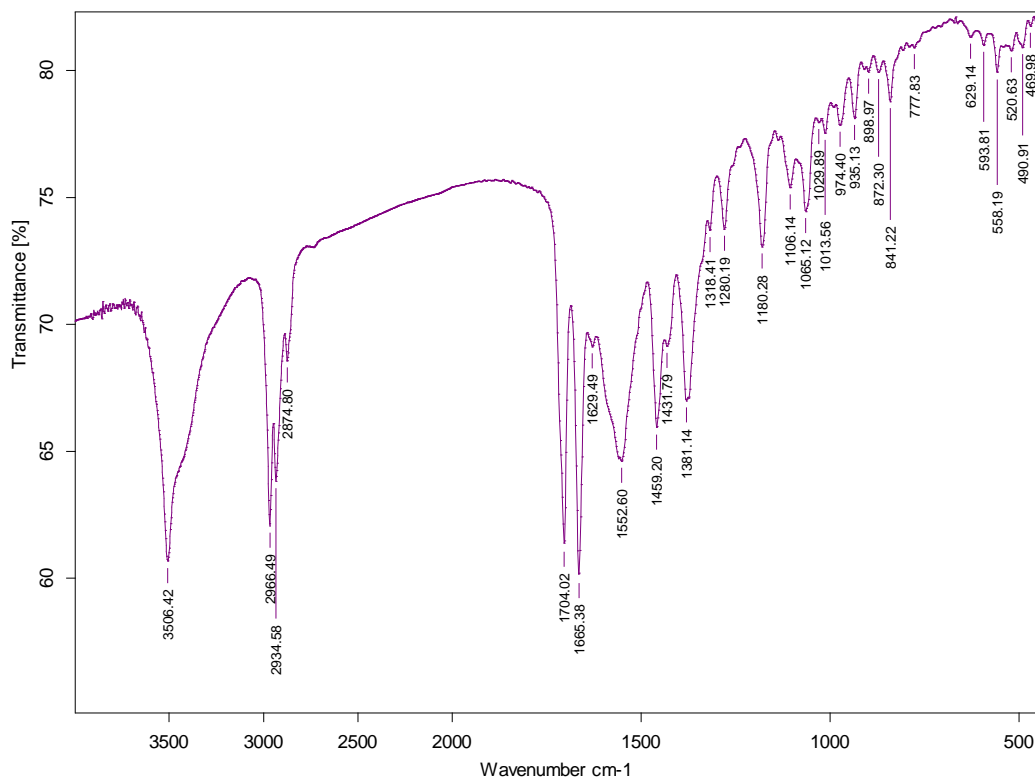

**Figure S34.**  $^1\text{H}$  NMR (400 MHz) spectrum of compound **2** (Recorded in  $\text{C}_5\text{D}_5\text{N}$ , 298 K)

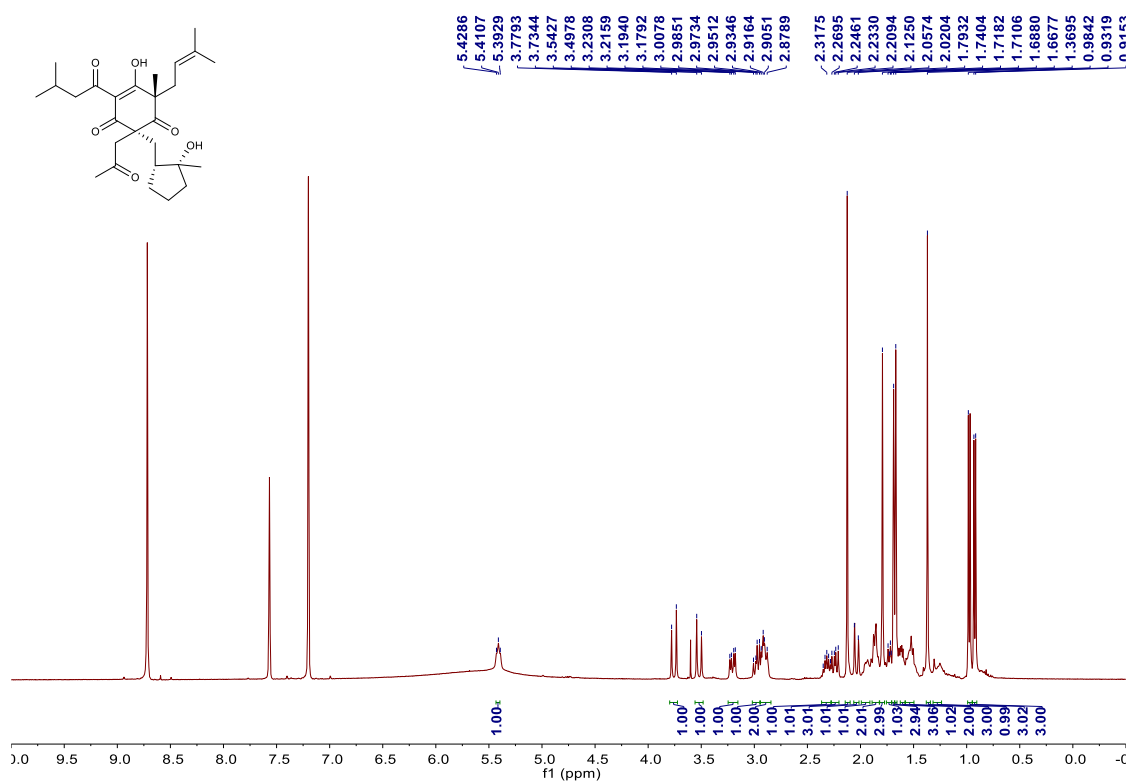

**Figure S35.**  $^{13}\text{C}$  NMR (100 MHz) spectrum of compound **2** (Recorded in  $\text{C}_5\text{D}_5\text{N}$ , 298 K)

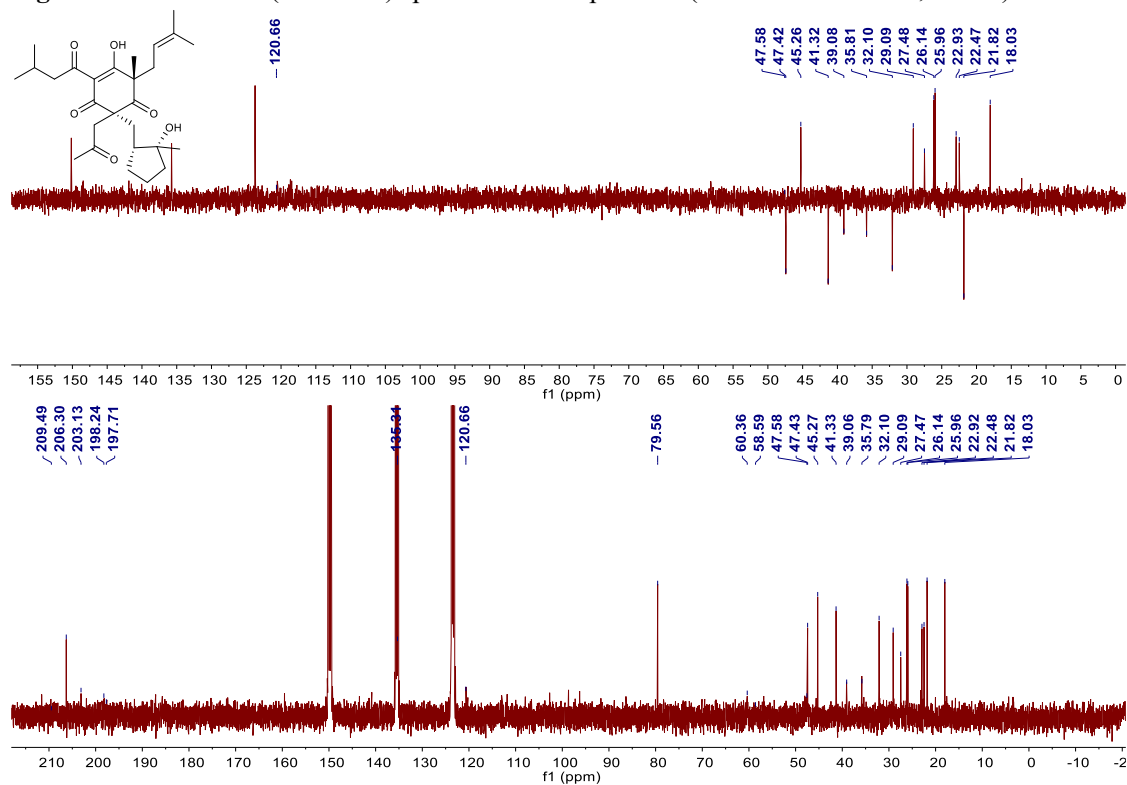

Figure S36. HSQC spectrum of compound **2** (Recorded in C<sub>5</sub>D<sub>5</sub>N, 298 K)

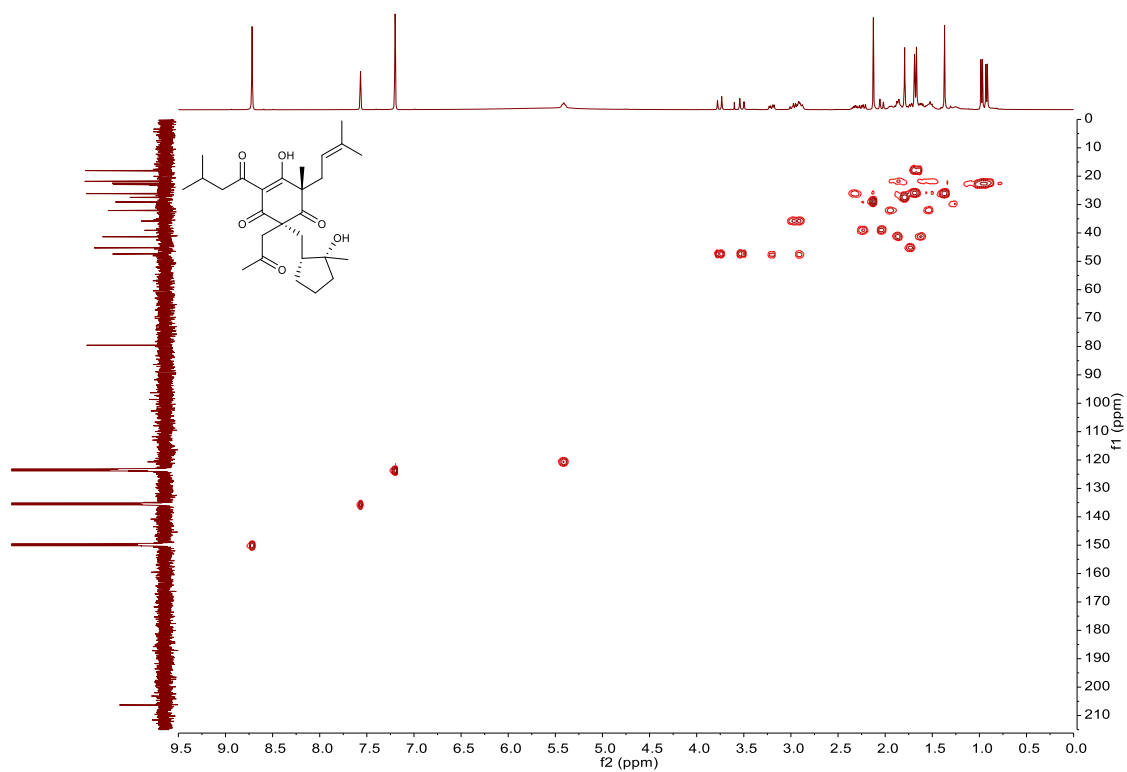

Figure S37. <sup>1</sup>H-<sup>1</sup>H COSY spectrum of compound **2** (Recorded in C<sub>5</sub>D<sub>5</sub>N, 298 K)

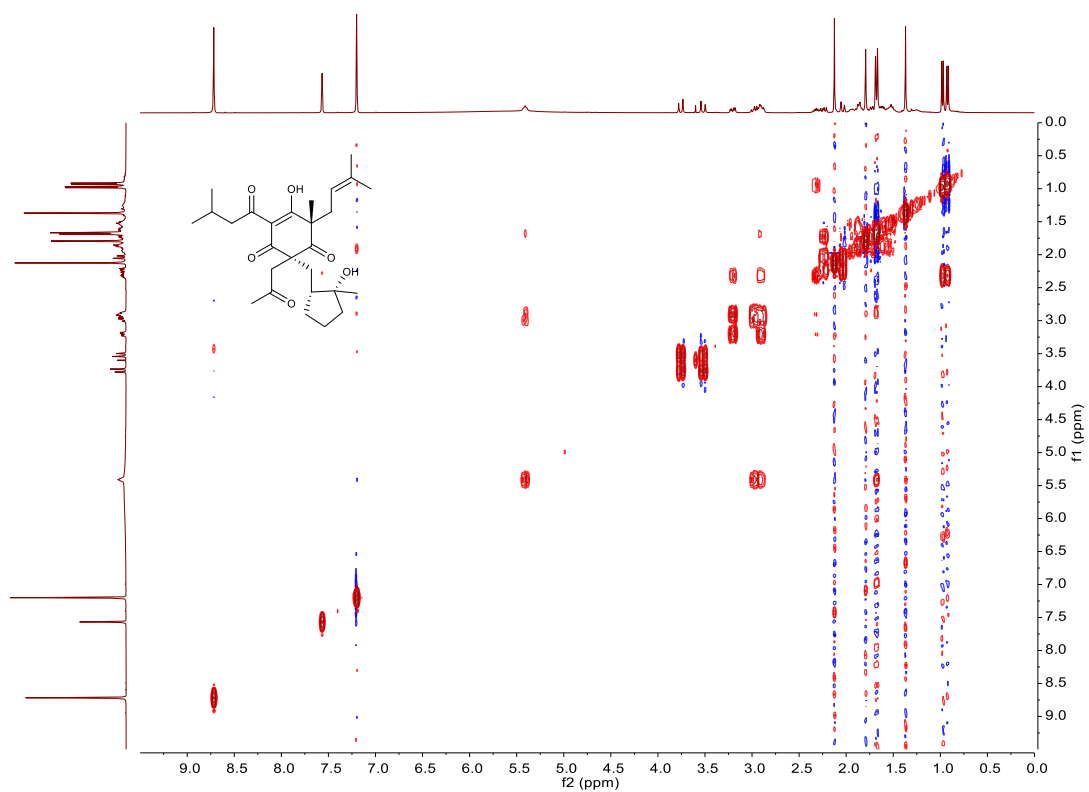

Figure S38. HMBC spectrum of compound **2** (Recorded in C<sub>5</sub>D<sub>5</sub>N, 298 K)

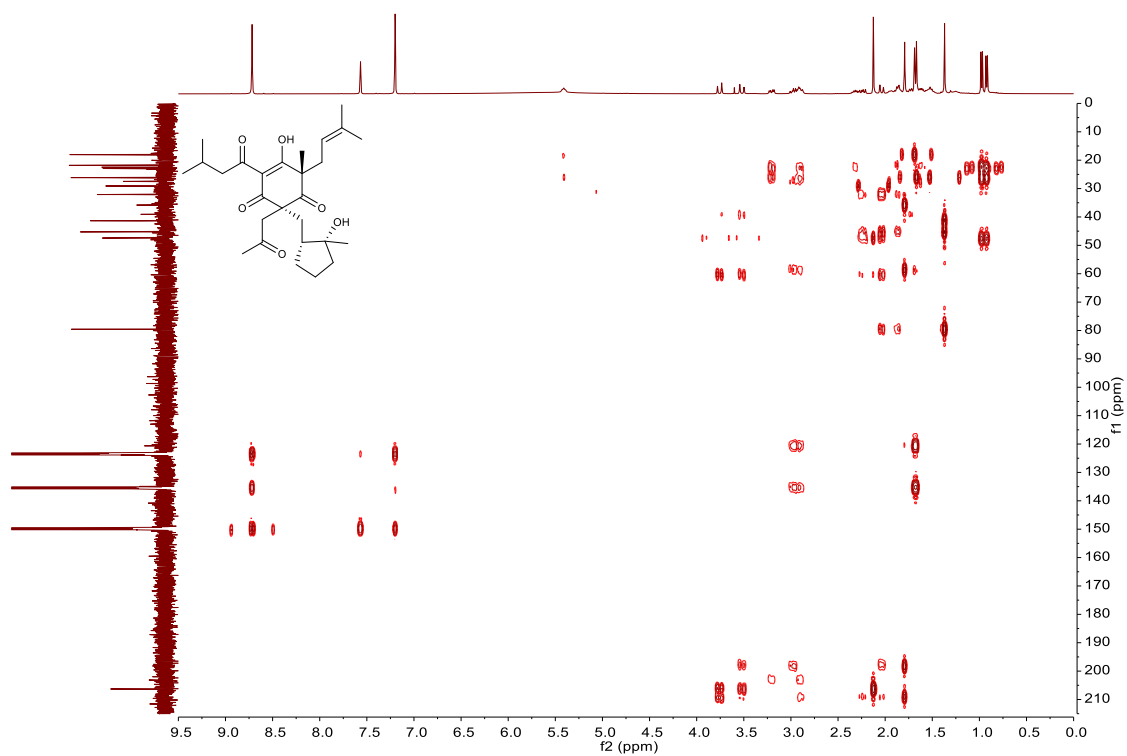

Figure S39. NOESY spectrum of compound **2** (Recorded in C<sub>5</sub>D<sub>5</sub>N, 298 K)

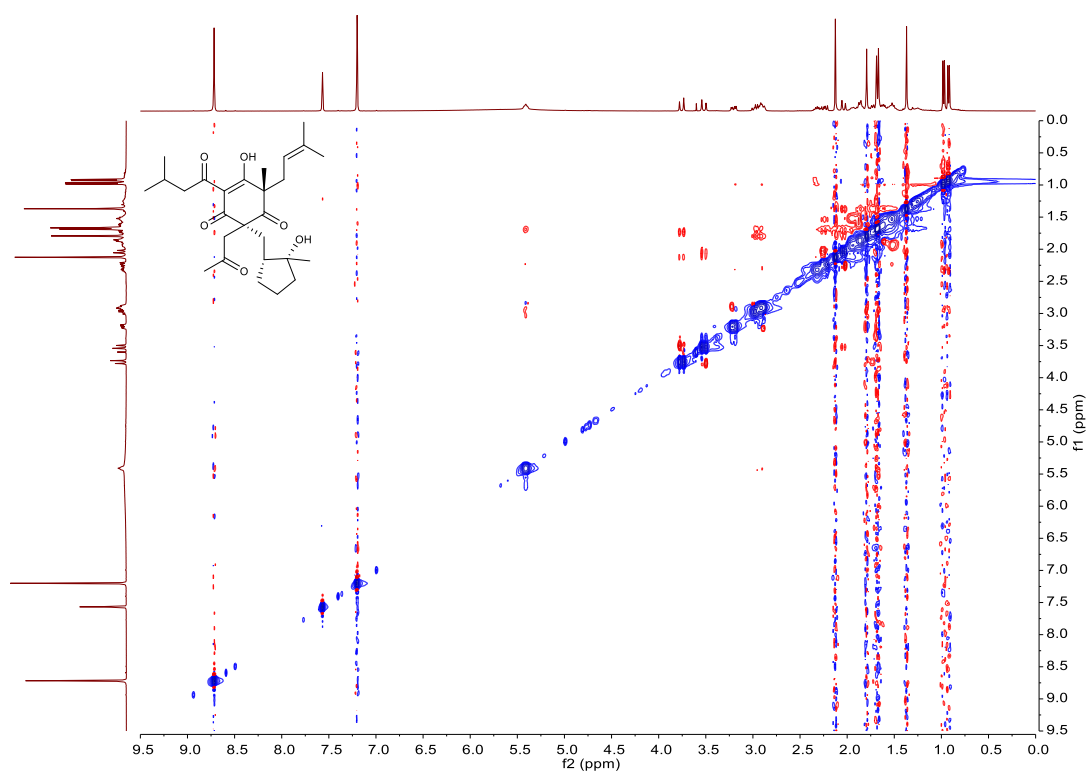

**Figure S40.** HRESIMS of compound 2.

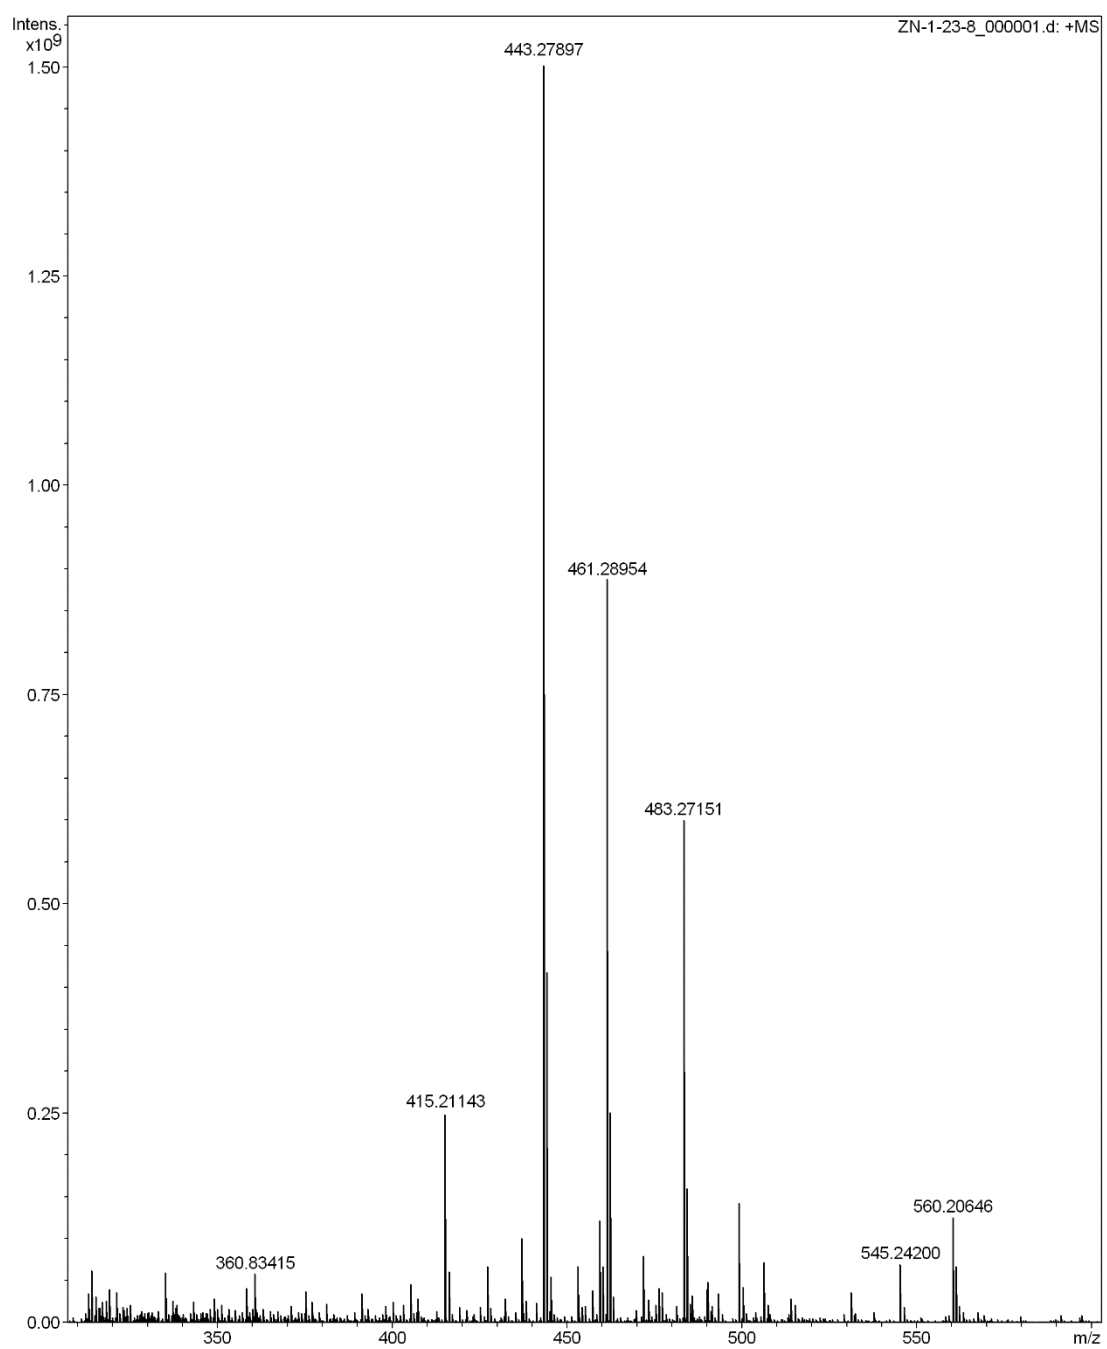

**Figure S41.** UV spectrum of compound **2**

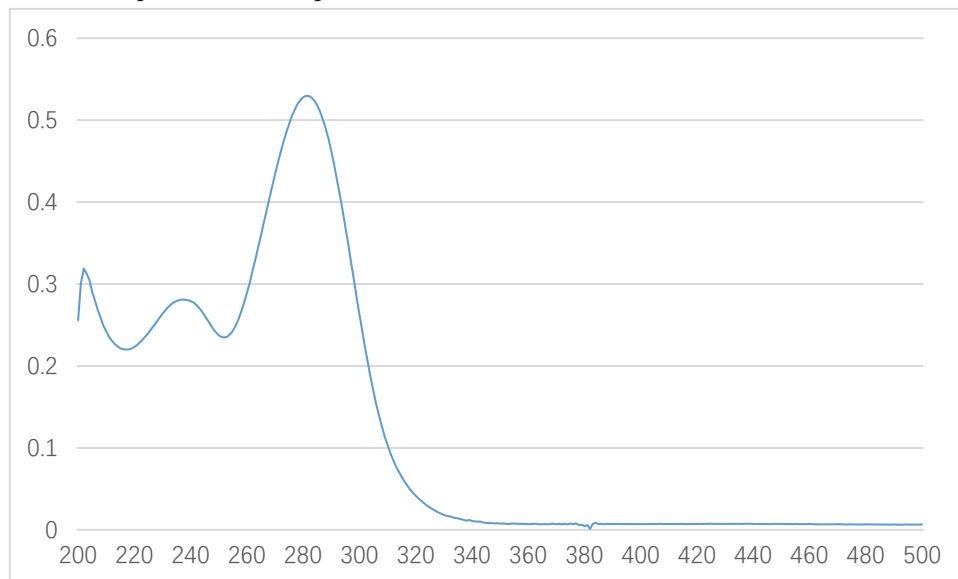

**Figure S42.** IR spectrum of compound **2**

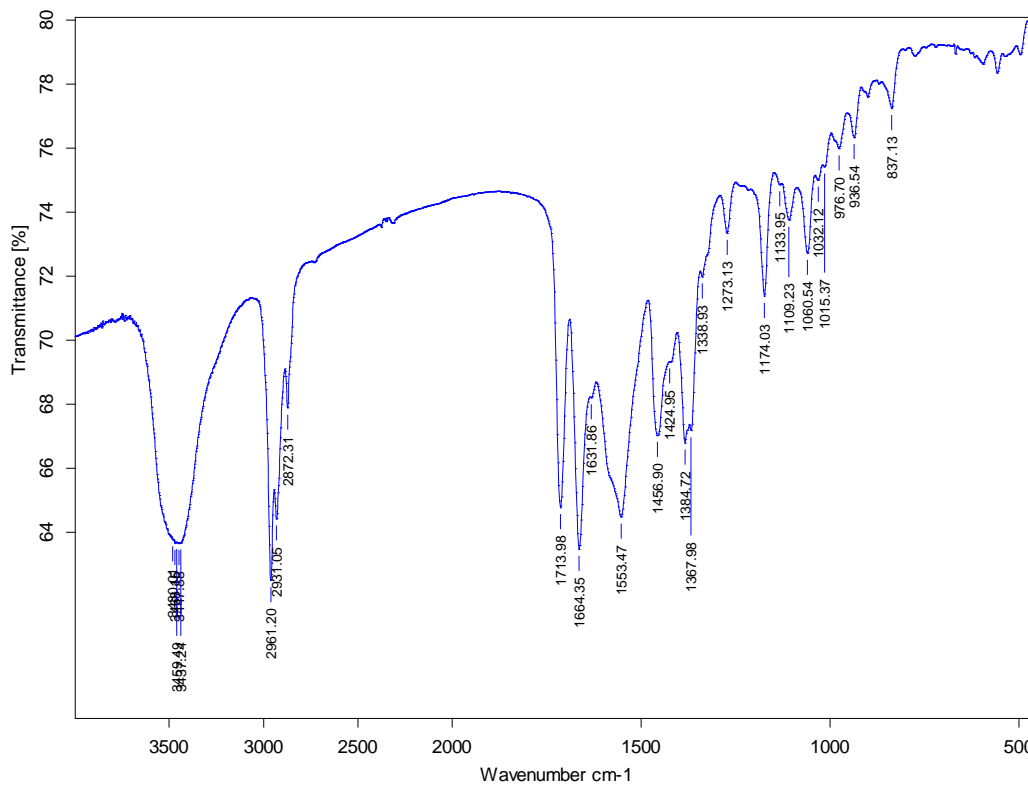



**Figure S43.**  $^1\text{H}$  NMR (400 MHz) spectrum of compound **3** (Recorded in  $\text{C}_5\text{D}_5\text{N}$ , 298 K)

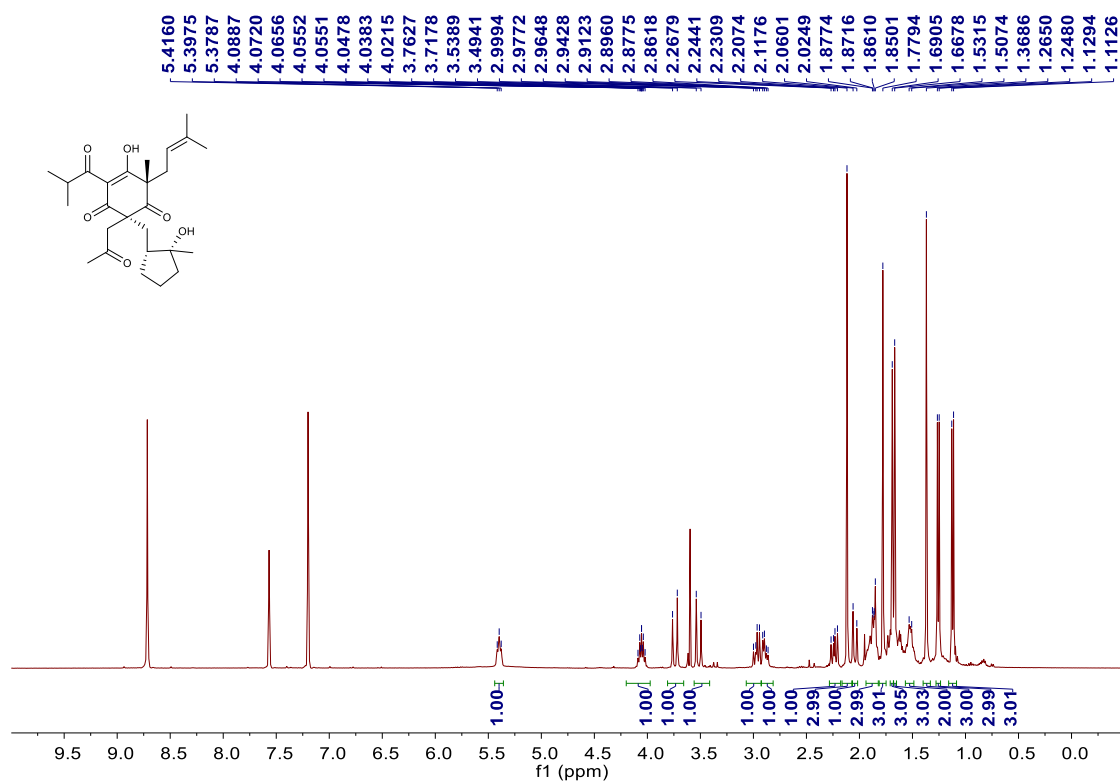

**Figure S44.**  $^{13}\text{C}$  NMR (100 MHz) spectrum of compound **3** (Recorded in  $\text{C}_5\text{D}_5\text{N}$ , 298 K)

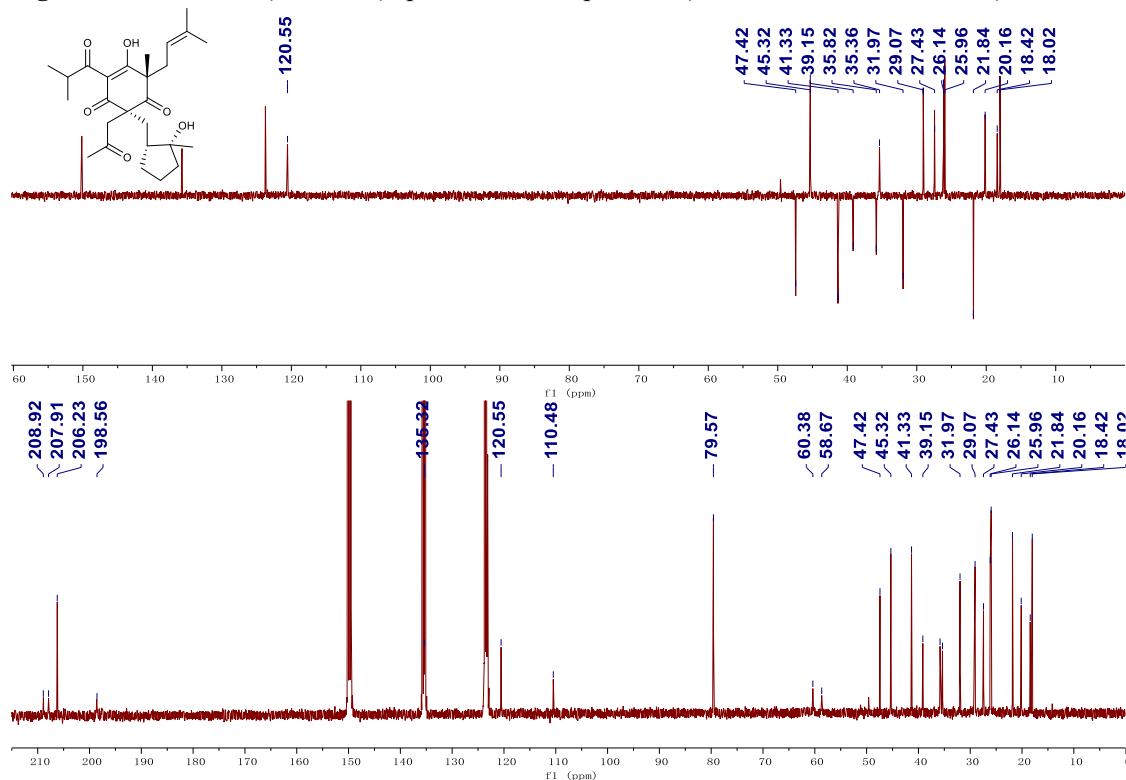

**Figure S45.** HSQC spectrum of compound **3** (Recorded in C<sub>5</sub>D<sub>5</sub>N, 298 K)

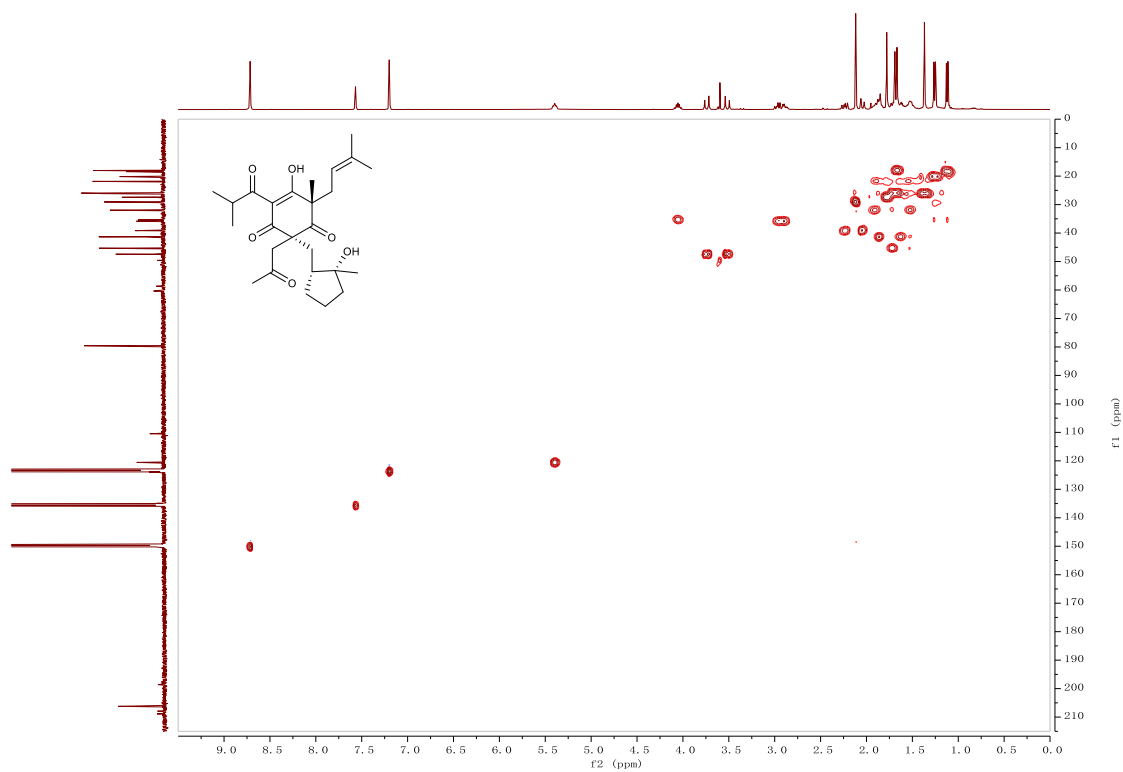

**Figure S46.** <sup>1</sup>H-<sup>1</sup>H COSY spectrum of compound **3** (Recorded in C<sub>5</sub>D<sub>5</sub>N, 298 K)

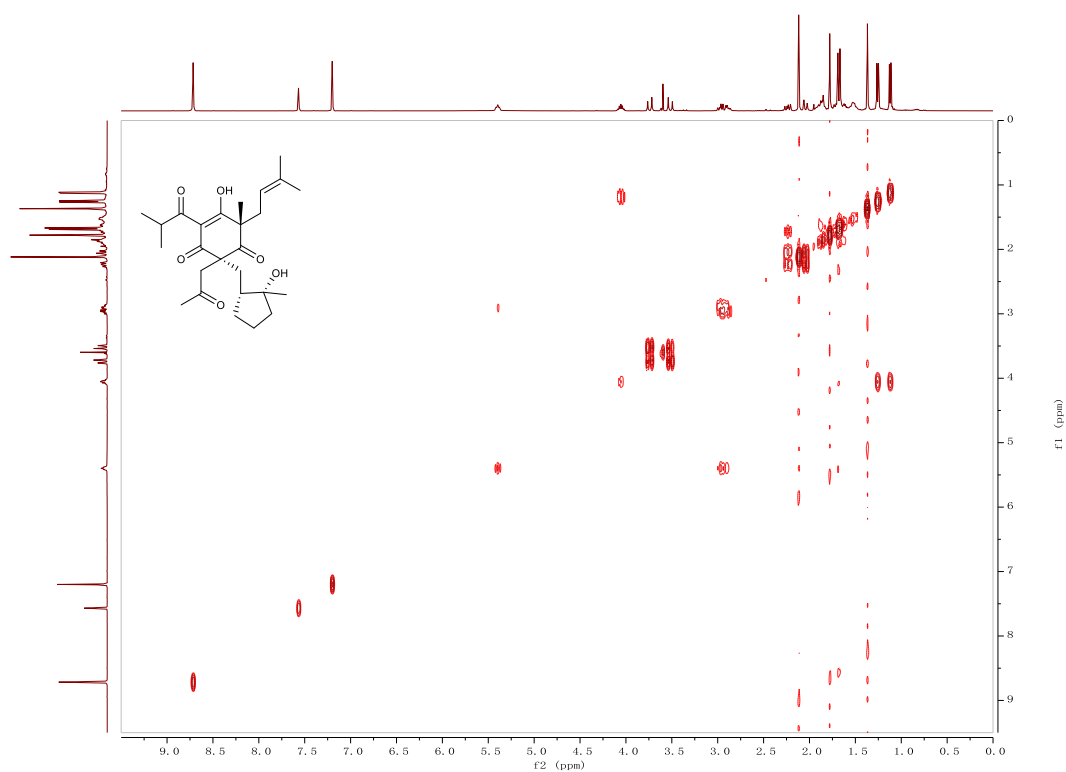

**Figure S47.** HMBC spectrum of compound **3** (Recorded in C<sub>5</sub>D<sub>5</sub>N, 298 K)

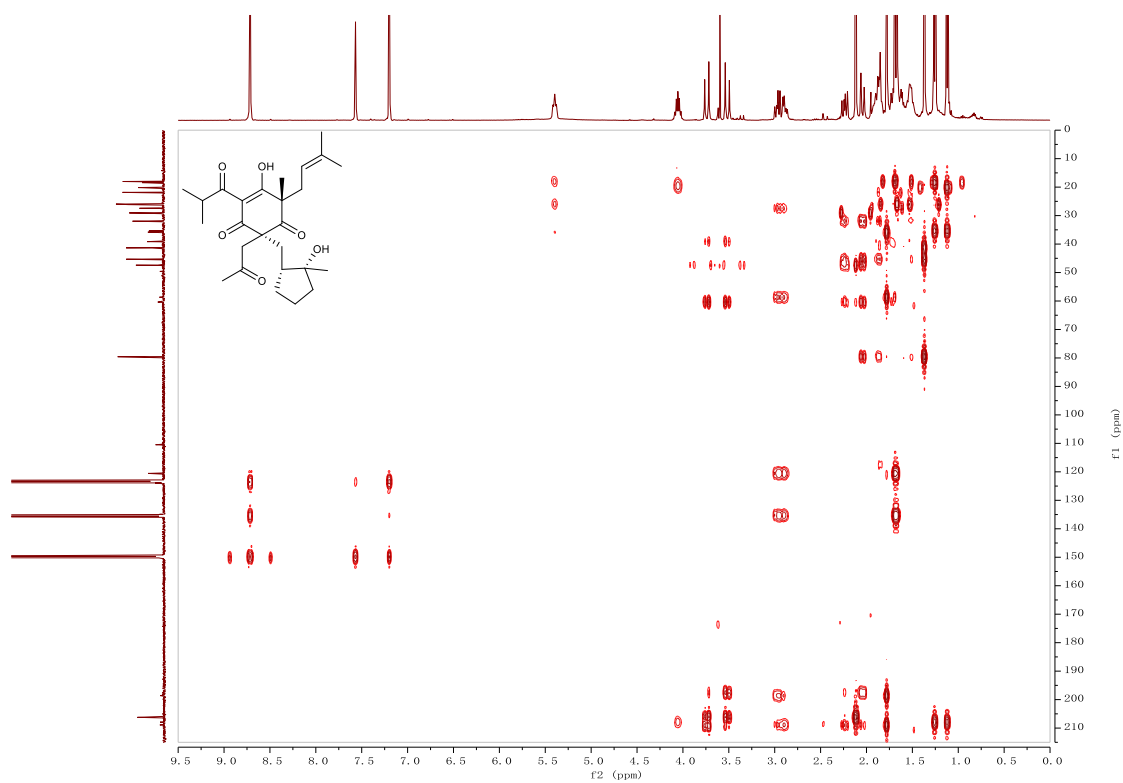

**Figure S48.** NOESY spectrum of compound **3** (Recorded in C<sub>5</sub>D<sub>5</sub>N, 298 K)

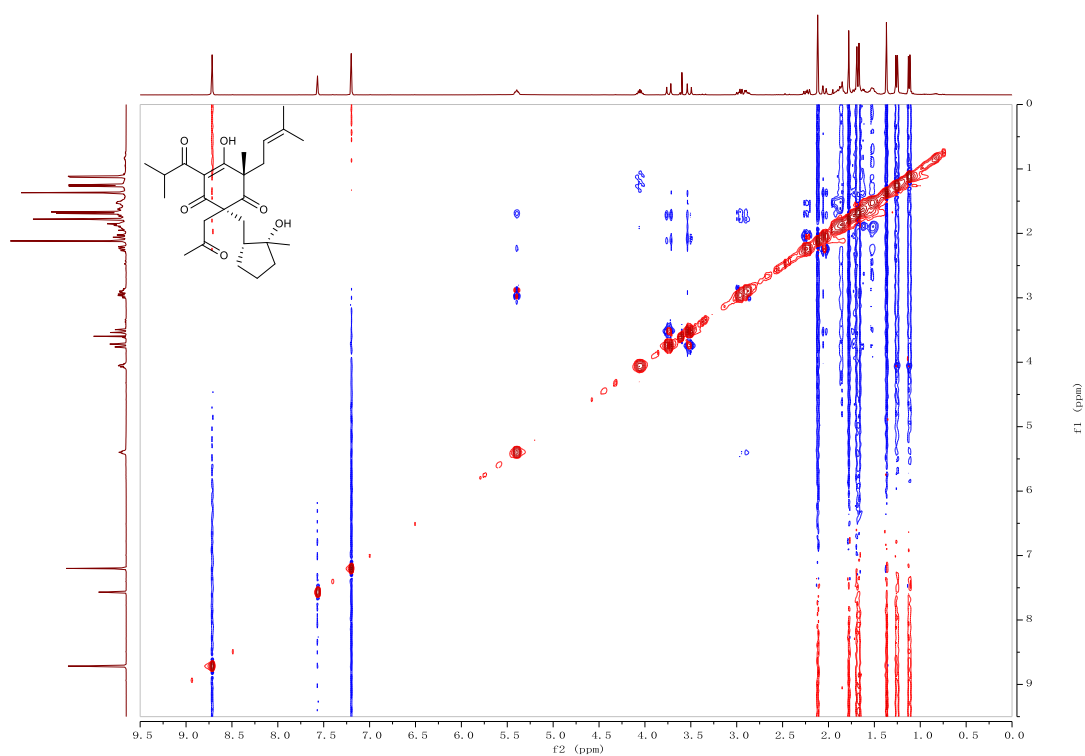

**Figure S49.** HRESIMS of compound **3**.

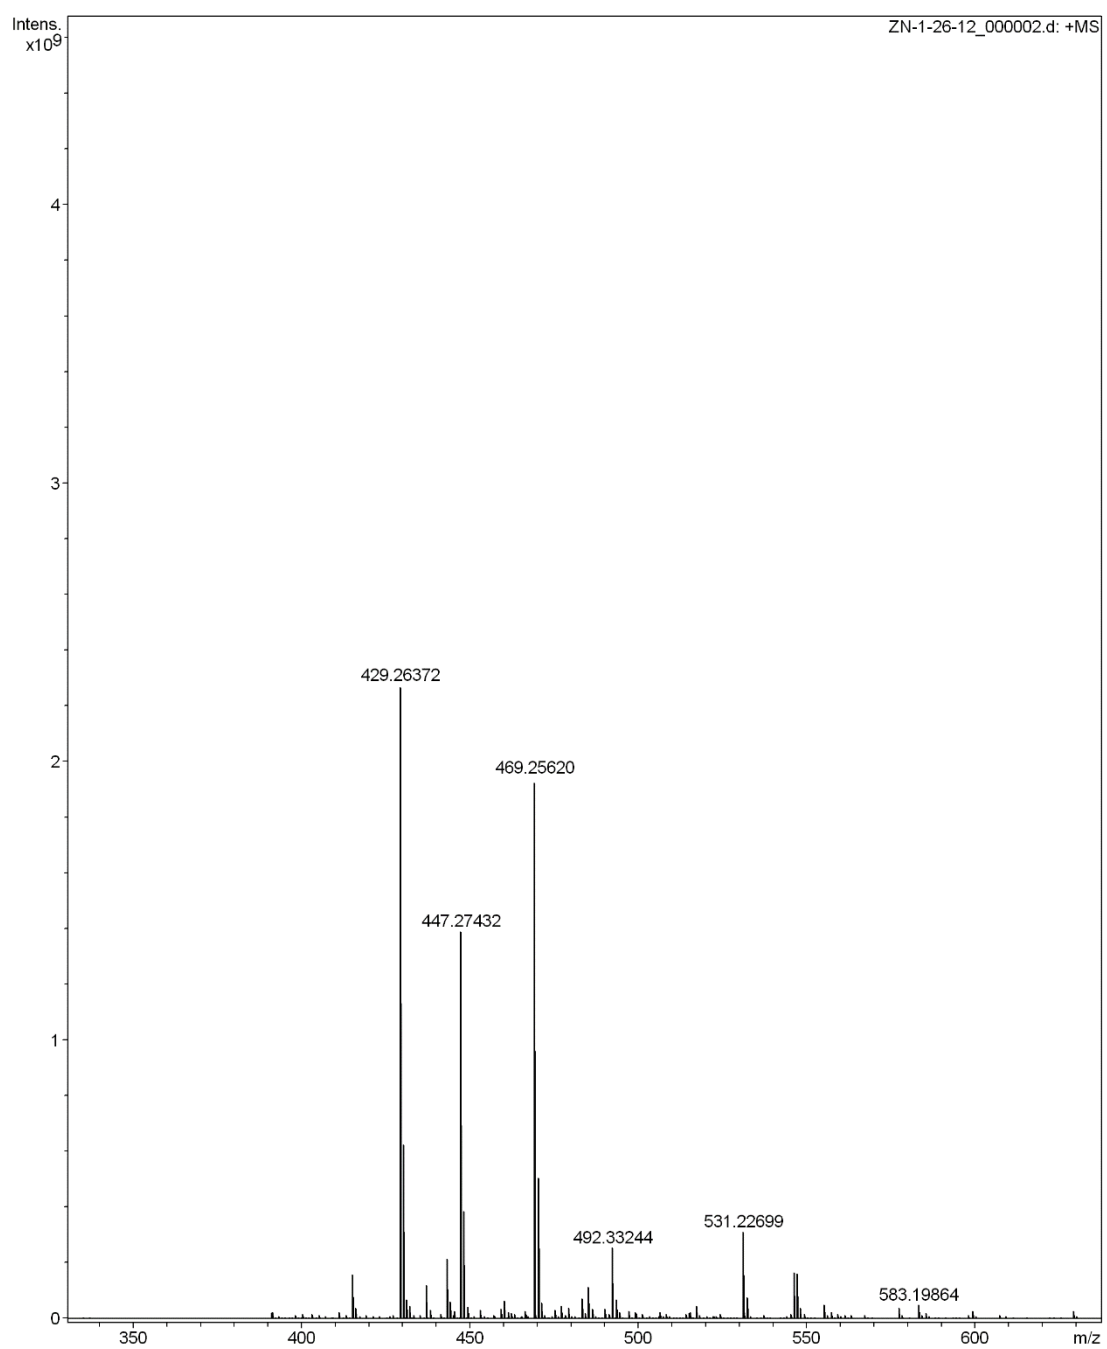

**Figure S50.** UV spectrum of compound **3**

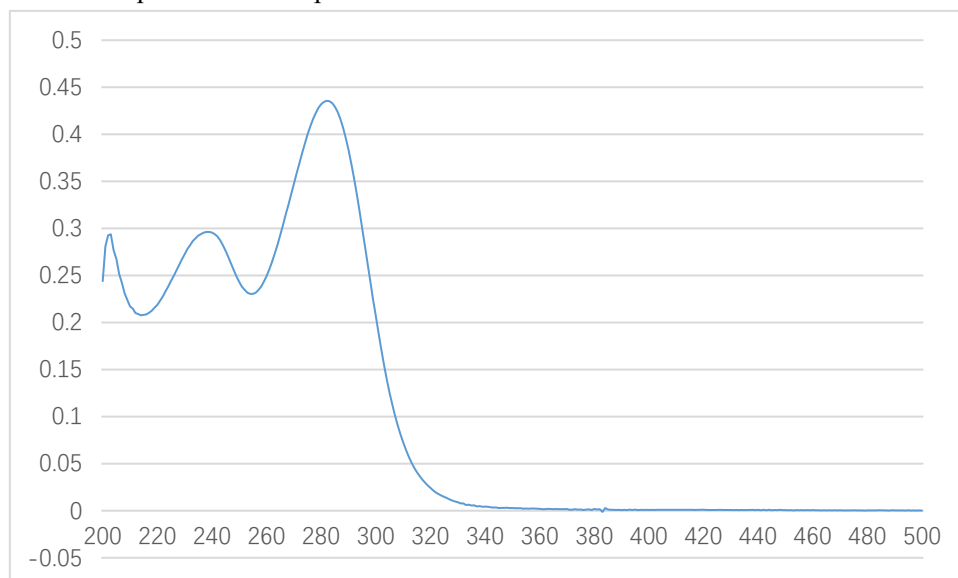

**Figure S51.** IR spectrum of compound **3**

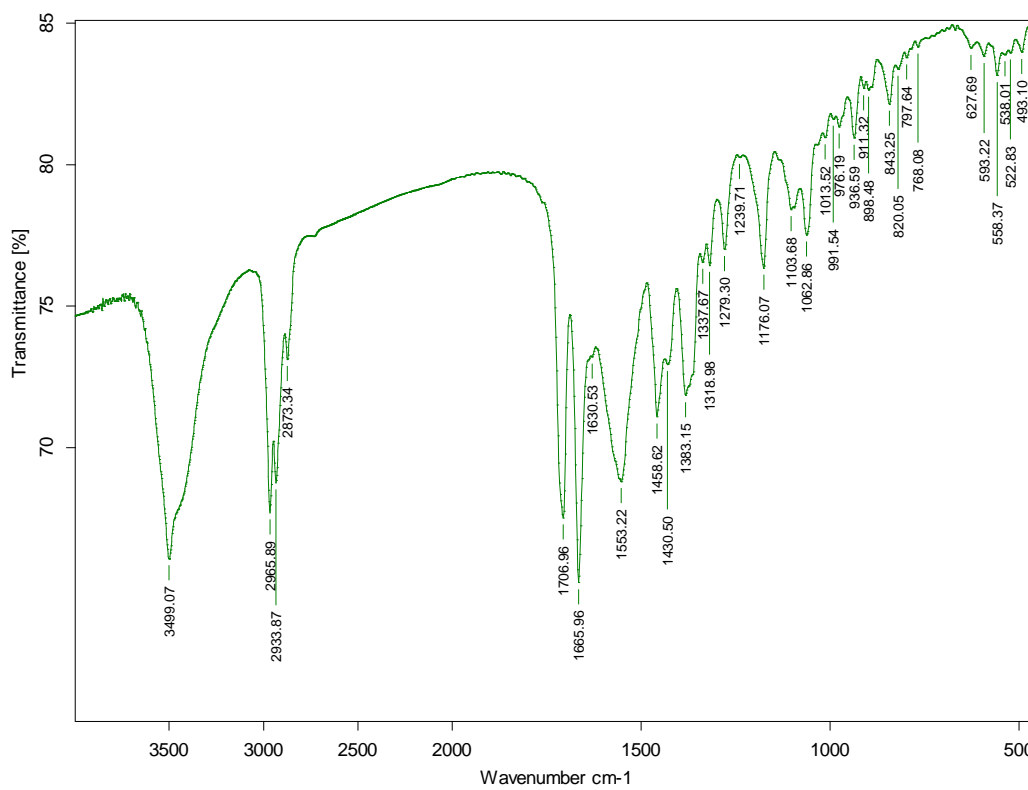

**Figure S52.**  $^1\text{H}$  NMR (800 MHz) spectrum of compound **4** (Recorded in  $\text{CDCl}_3$ , 298 K)

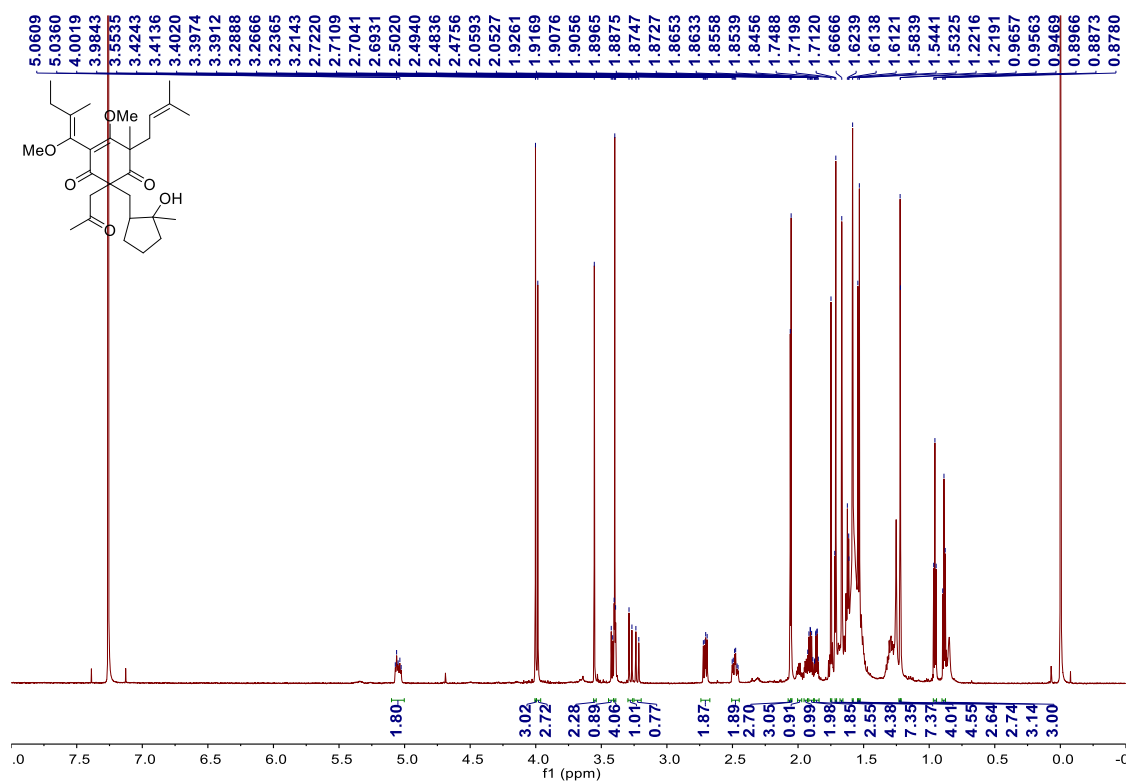

**Figure S53.**  $^{13}\text{C}$  NMR (200 MHz) spectrum of compound **4** (Recorded in  $\text{CDCl}_3$ , 298 K)

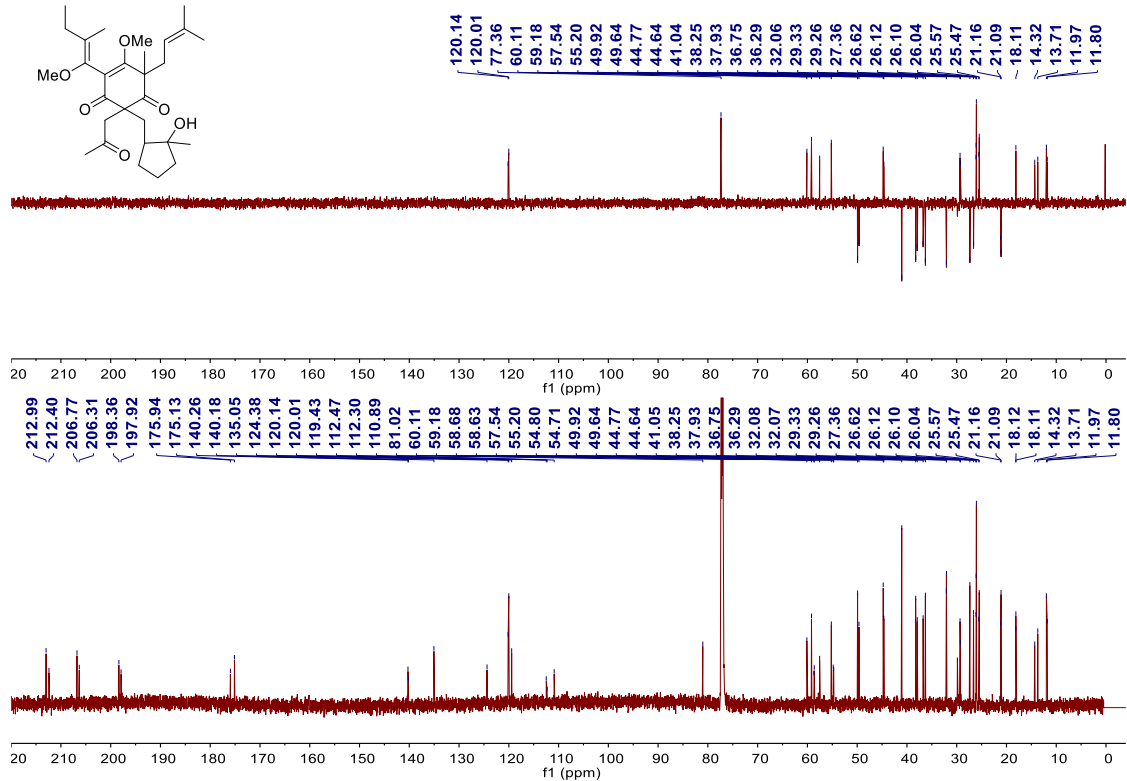

Figure S54. HSQC spectrum of compound 4 (Recorded in CDCl<sub>3</sub>, 298 K)

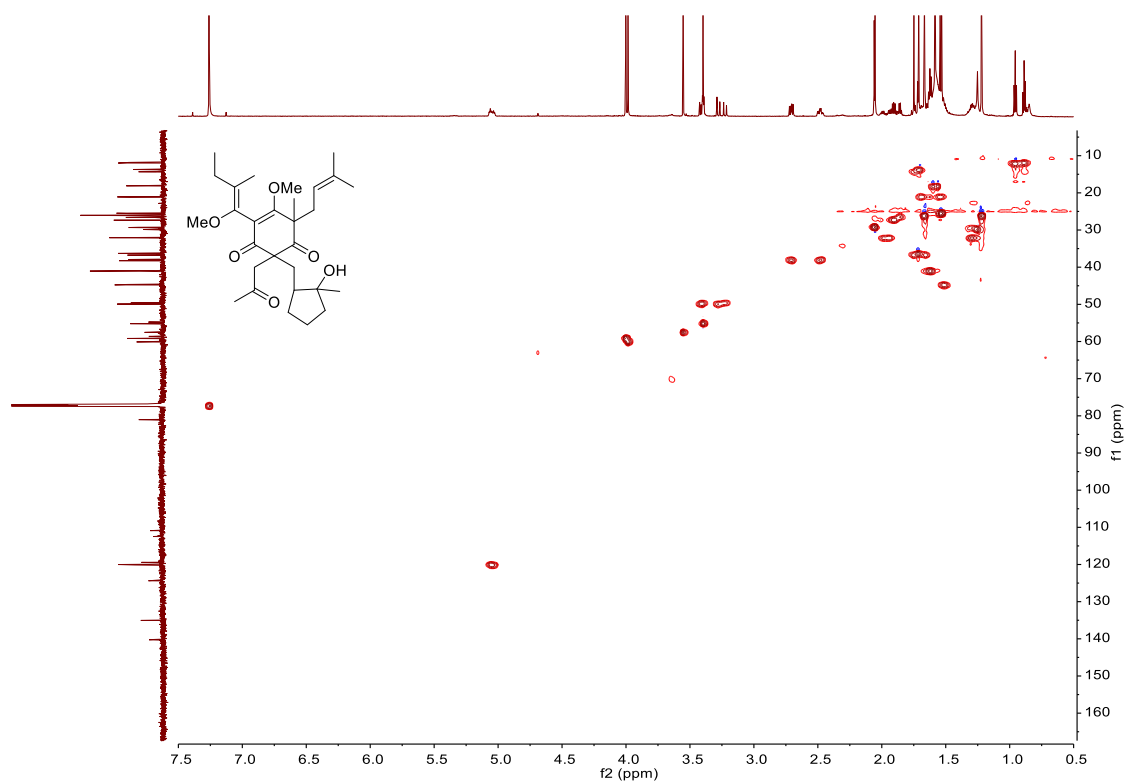

Figure S55. HMBC spectrum of compound 4 (Recorded in CDCl<sub>3</sub>, 298 K)

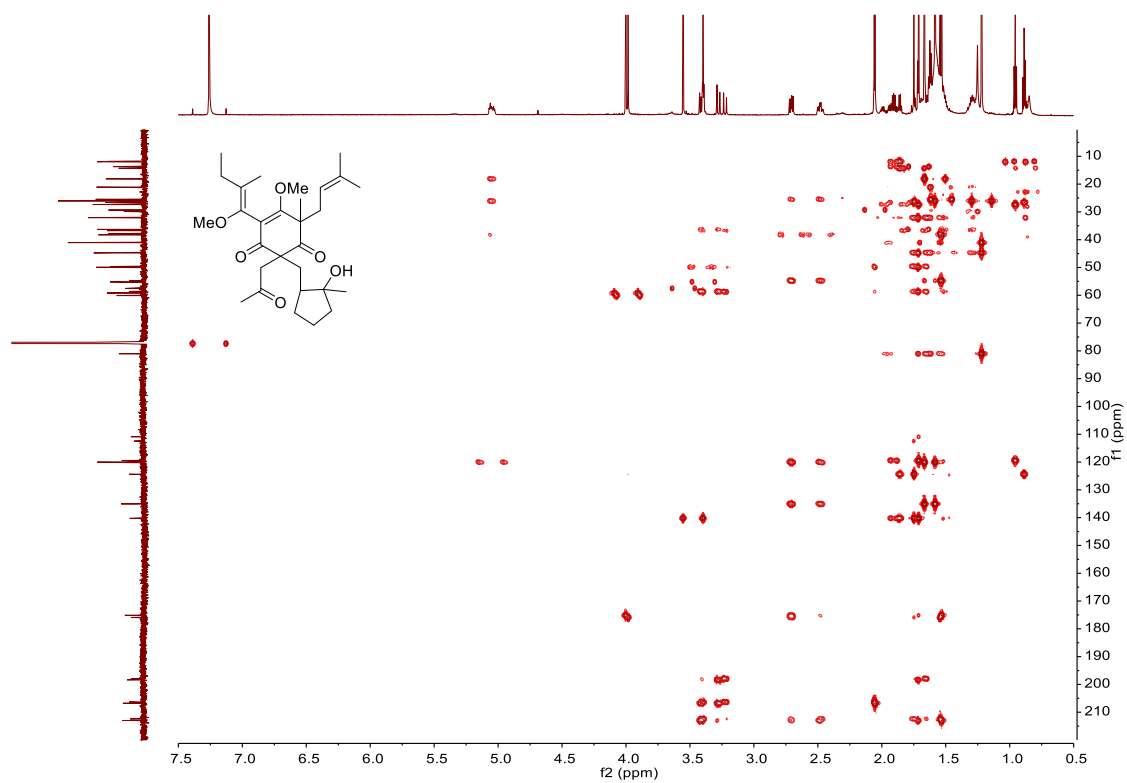

**Figure S56.** NOESY spectrum of compound **4** (Recorded in CDCl<sub>3</sub>, 298 K)

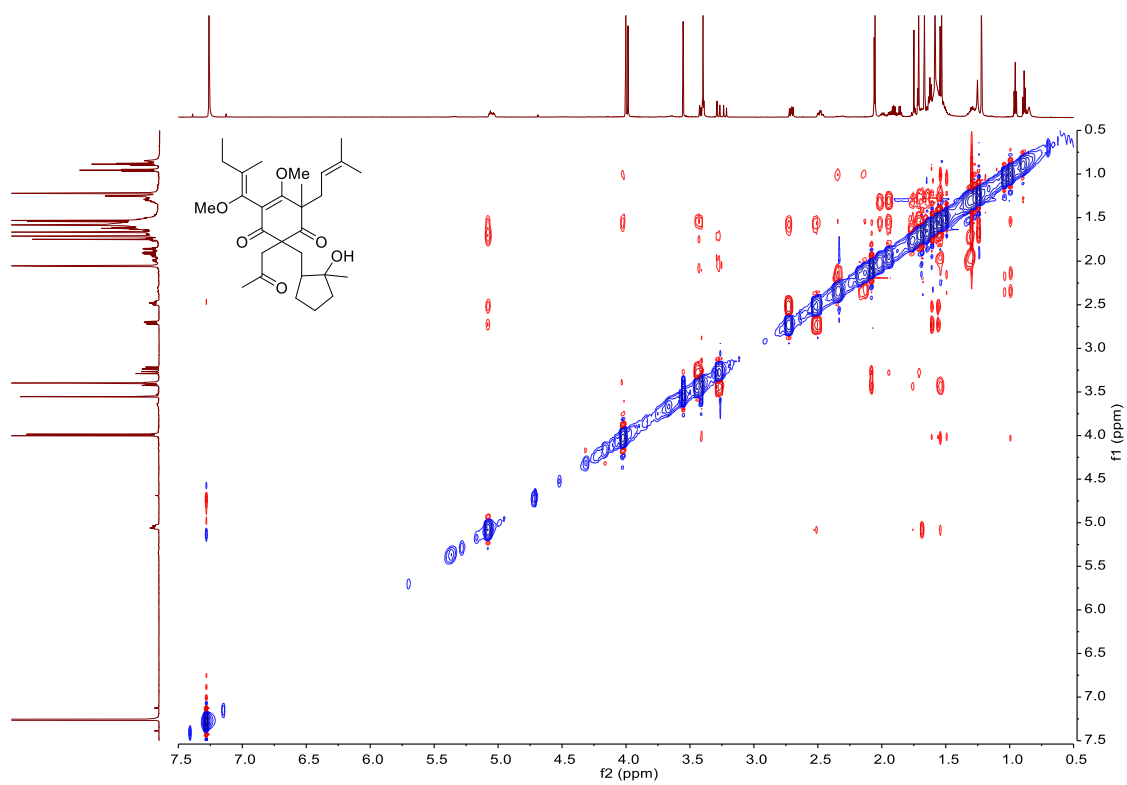



**Figures S57.** HRESIMS of compound 4

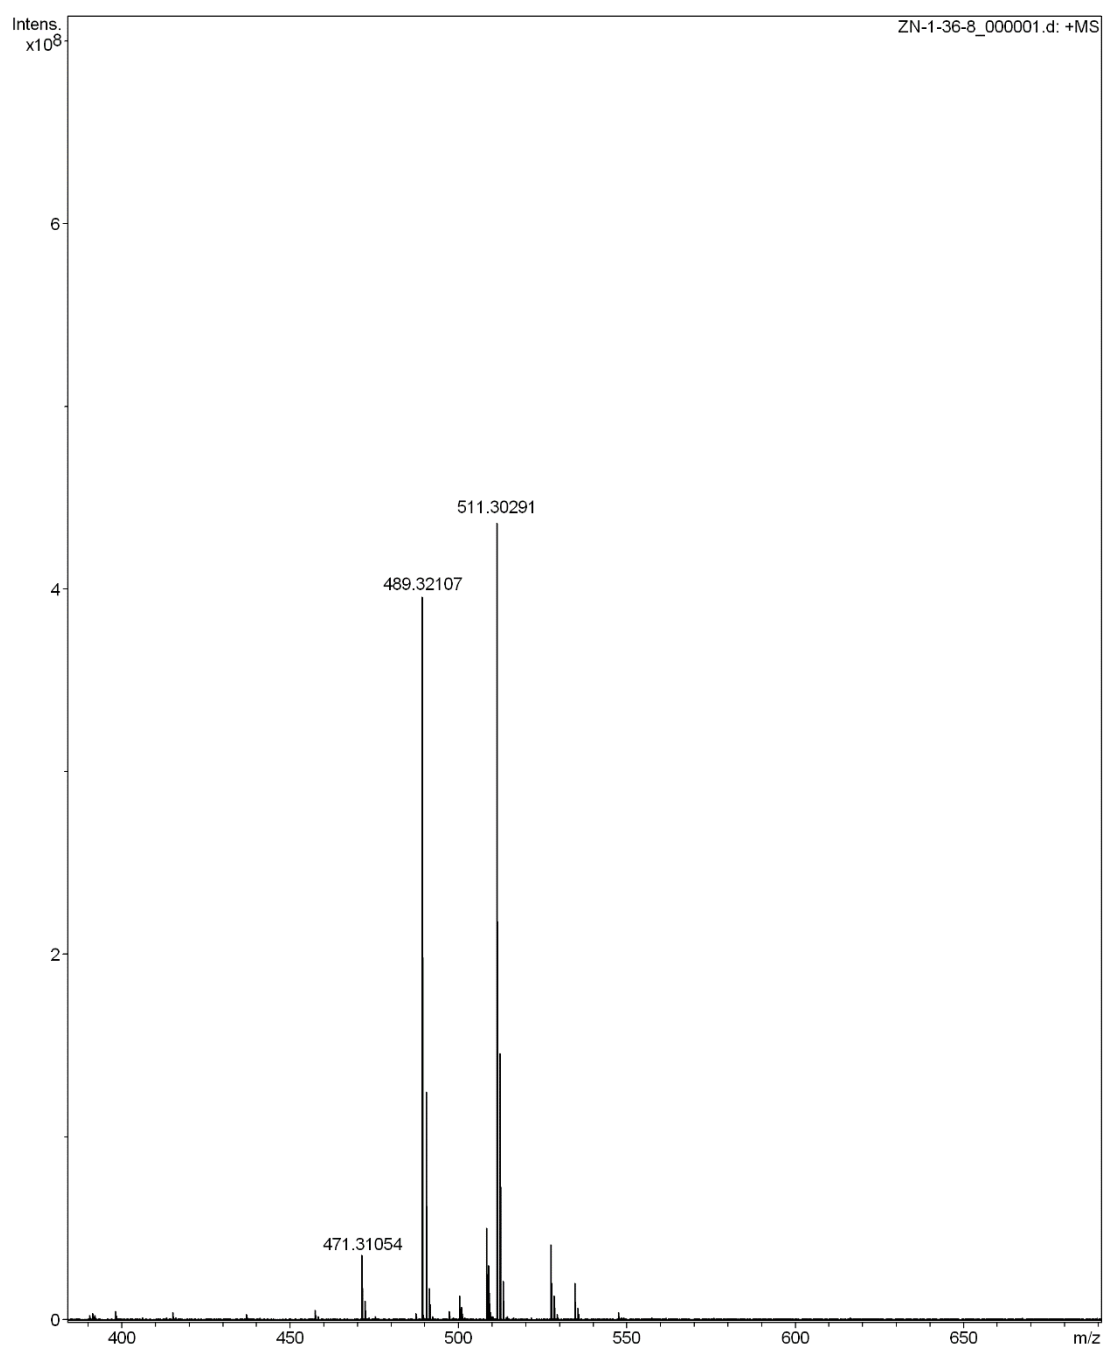

**Figure S58.**  $^1\text{H}$  NMR (800 MHz) spectrum of compound **5** (Recorded in  $\text{CDCl}_3$ , 298 K)

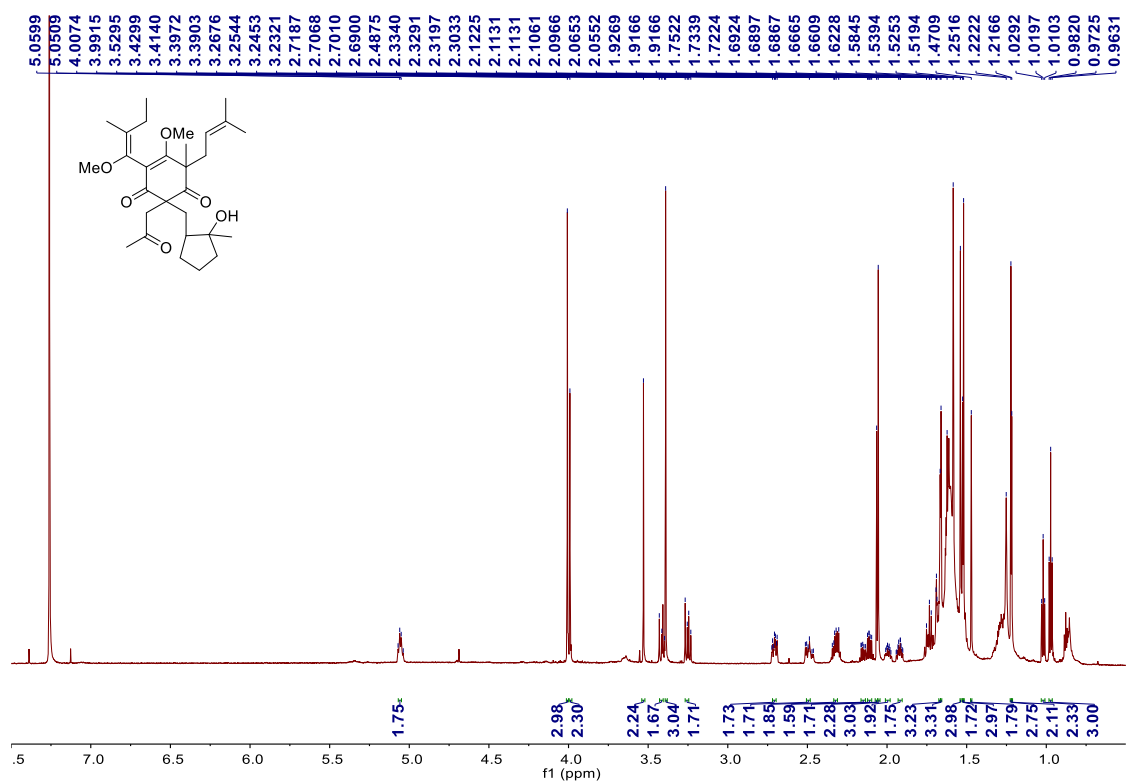

**Figure S59.**  $^{13}\text{C}$  NMR (200 MHz) spectrum of compound **5** (Recorded in  $\text{CDCl}_3$ , 298 K)

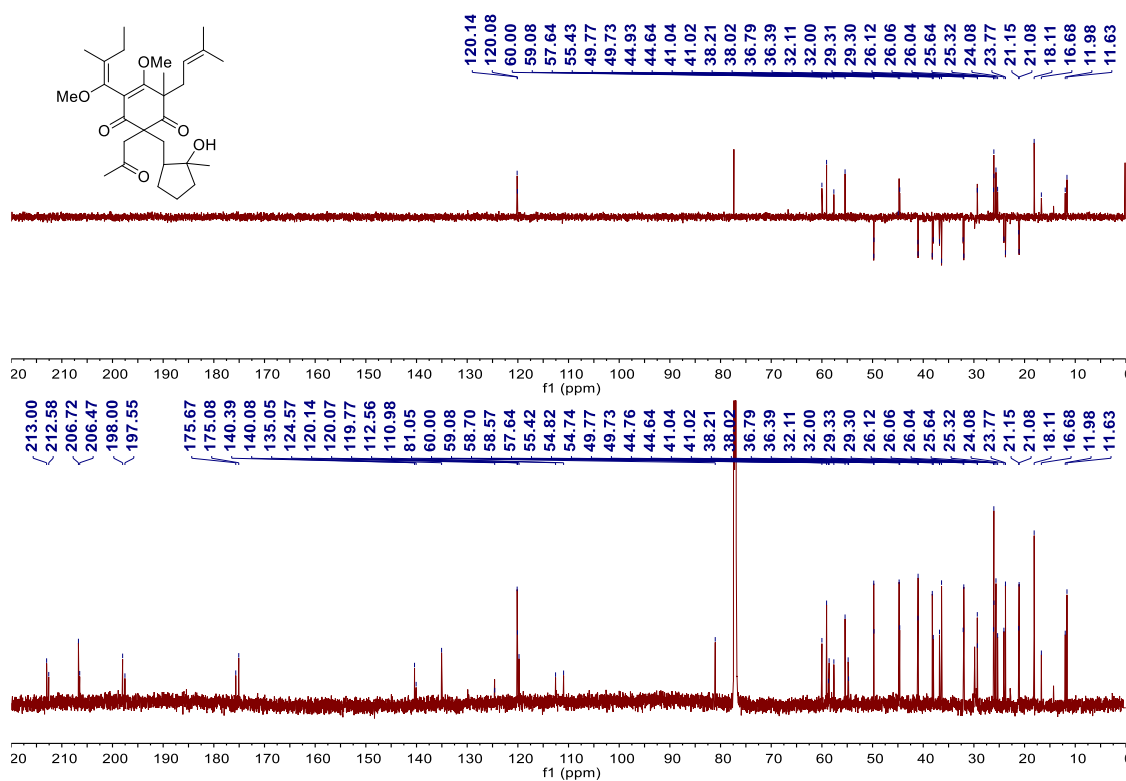

Figure S60. HSQC spectrum of compound **5** (Recorded in CDCl<sub>3</sub>, 298 K)

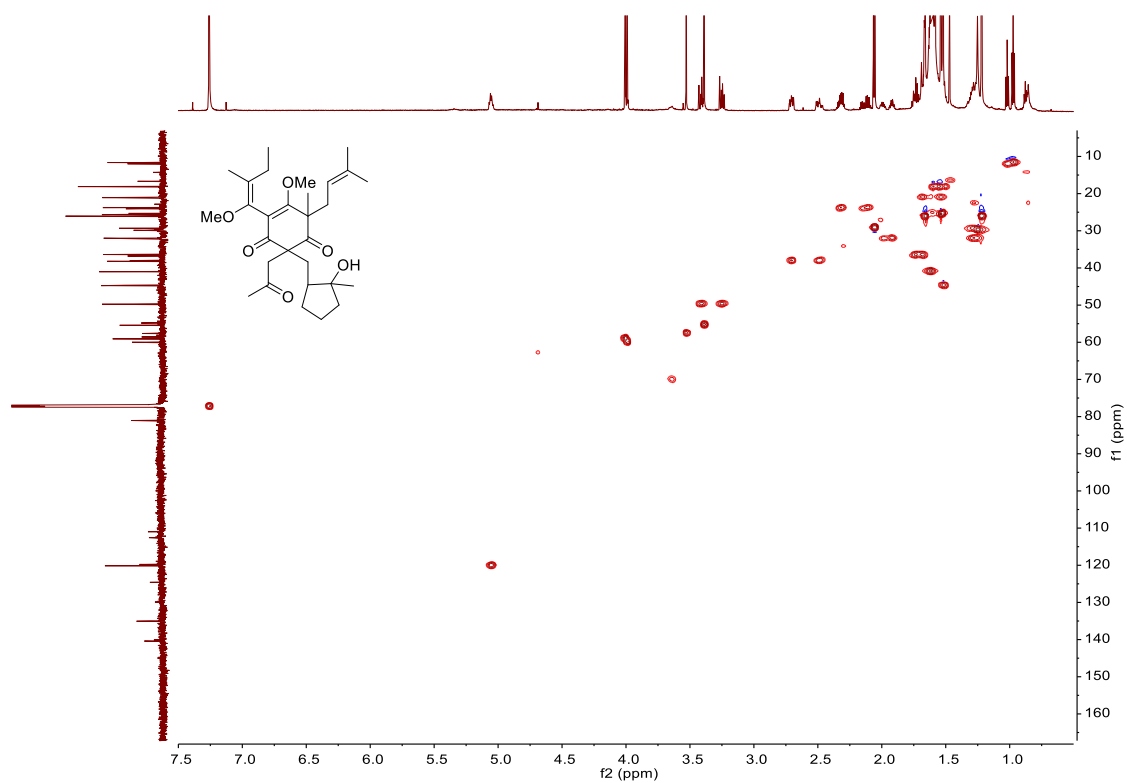

Figure S61. HMBC spectrum of compound **5** (Recorded in CDCl<sub>3</sub>, 298 K)

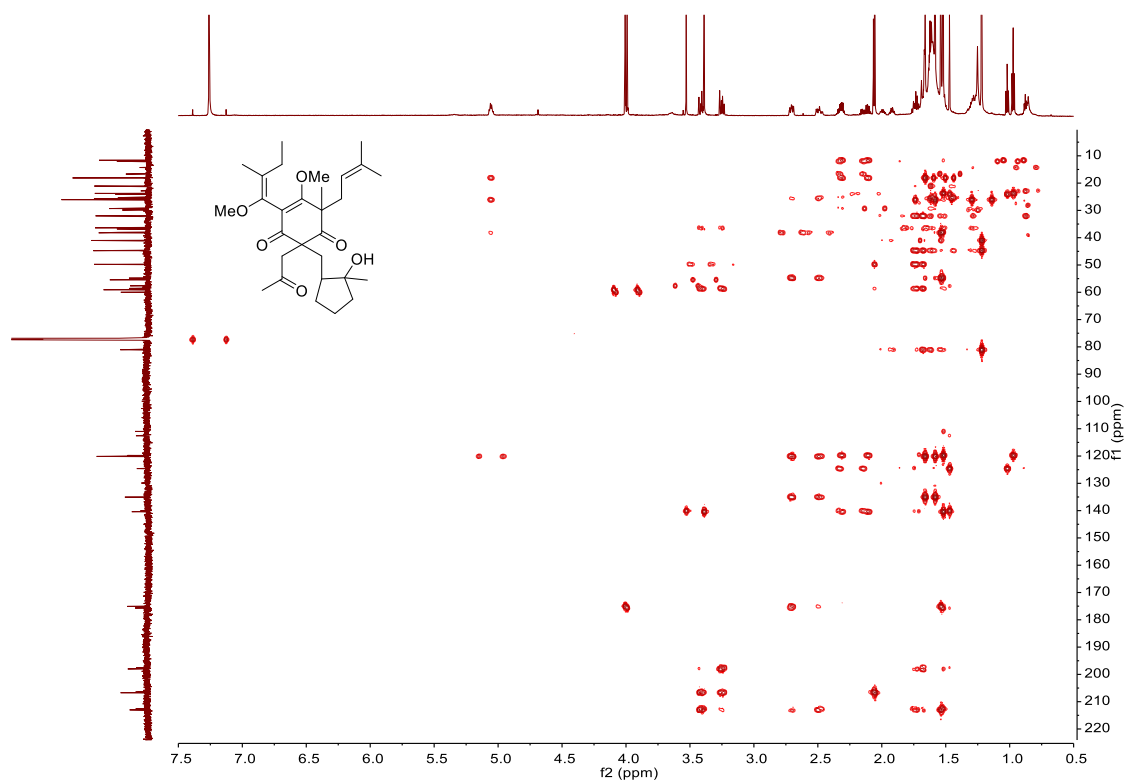

**Figure S62.** NOESY spectrum of compound **5** (Recorded in CDCl<sub>3</sub>, 298 K)

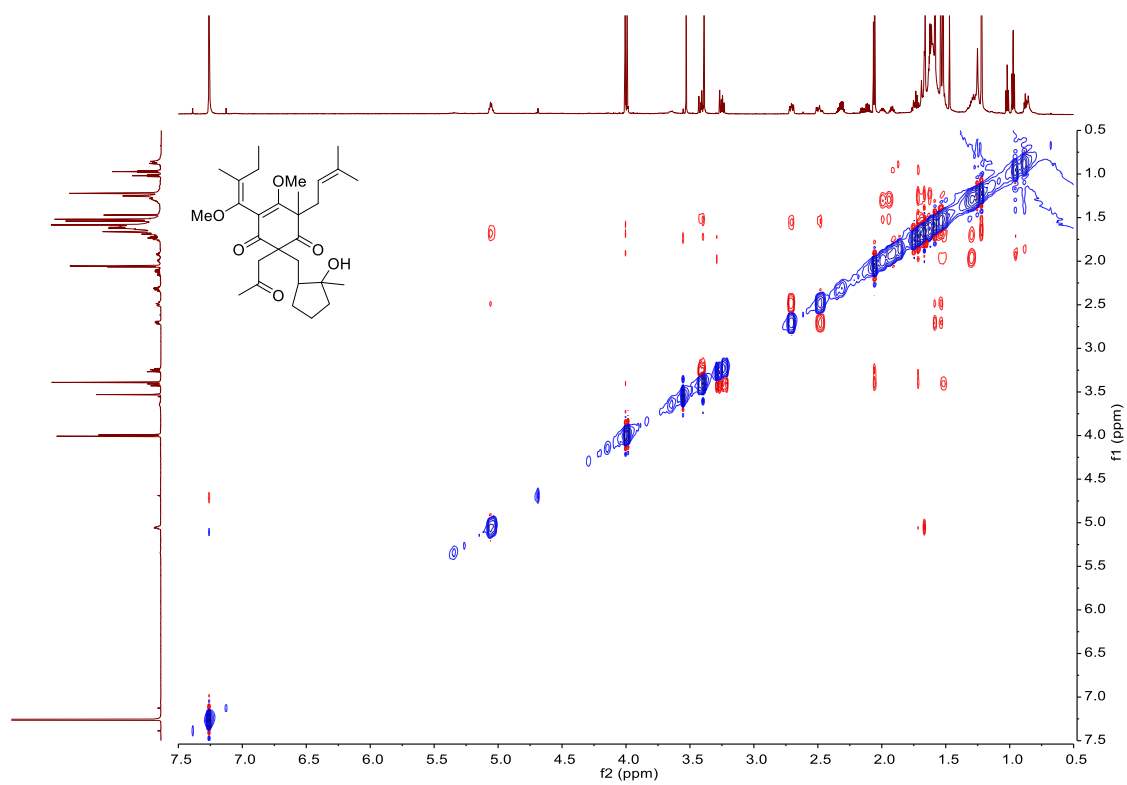

**Figure S63.** HRESIMS of compound **5**

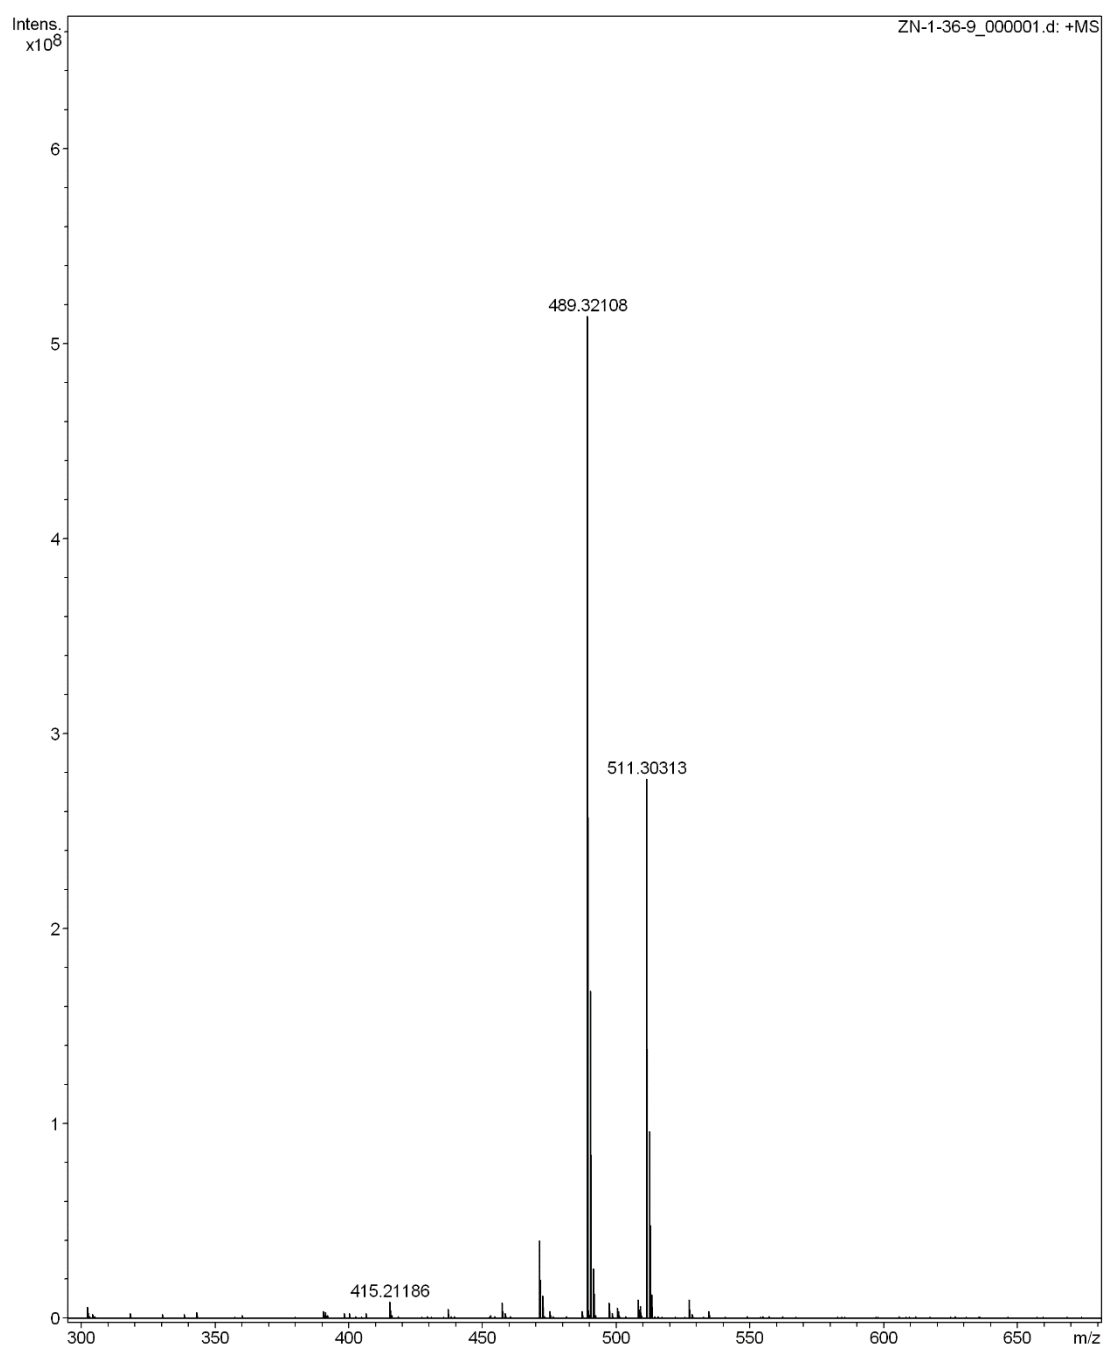

**Figure S64.**  $^1\text{H}$  NMR (800 MHz) spectrum of compound **6** (Recorded in  $\text{CDCl}_3$ , 298 K)

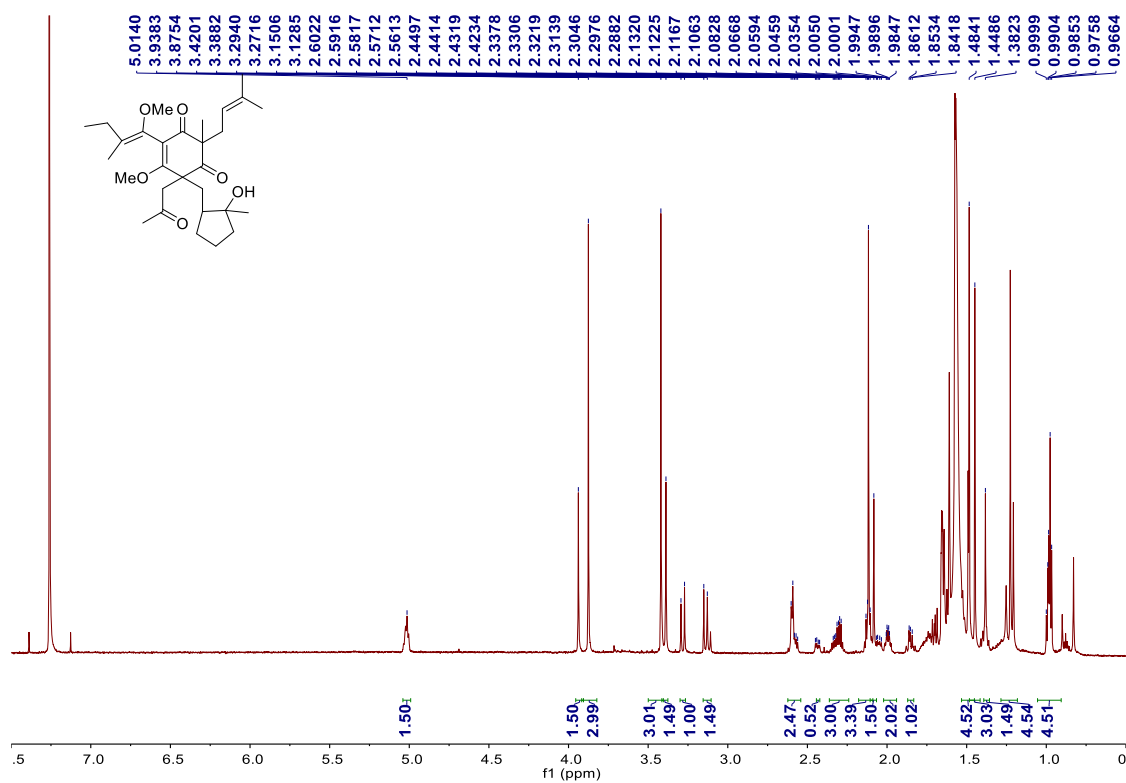

**Figure S65.**  $^{13}\text{C}$  NMR (200 MHz) spectrum of compound **6** (Recorded in  $\text{CDCl}_3$ , 298 K)

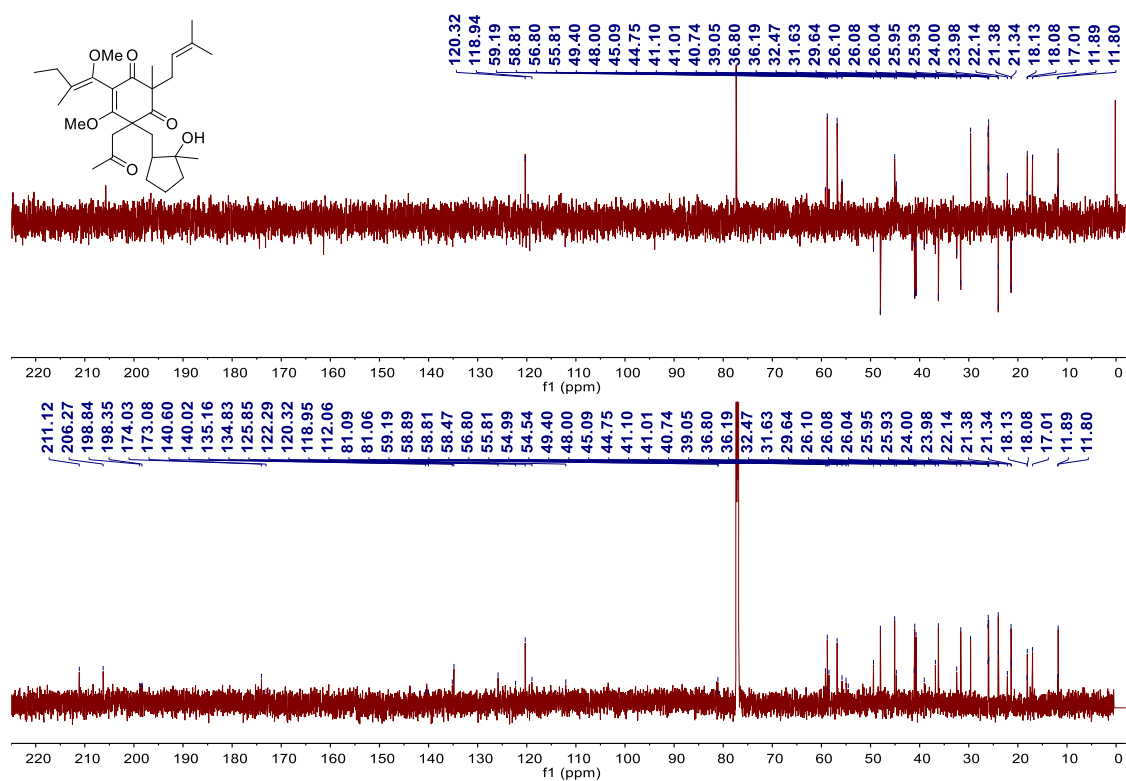

Figure S66. HSQC spectrum of compound **6** (Recorded in CDCl<sub>3</sub>, 298 K)

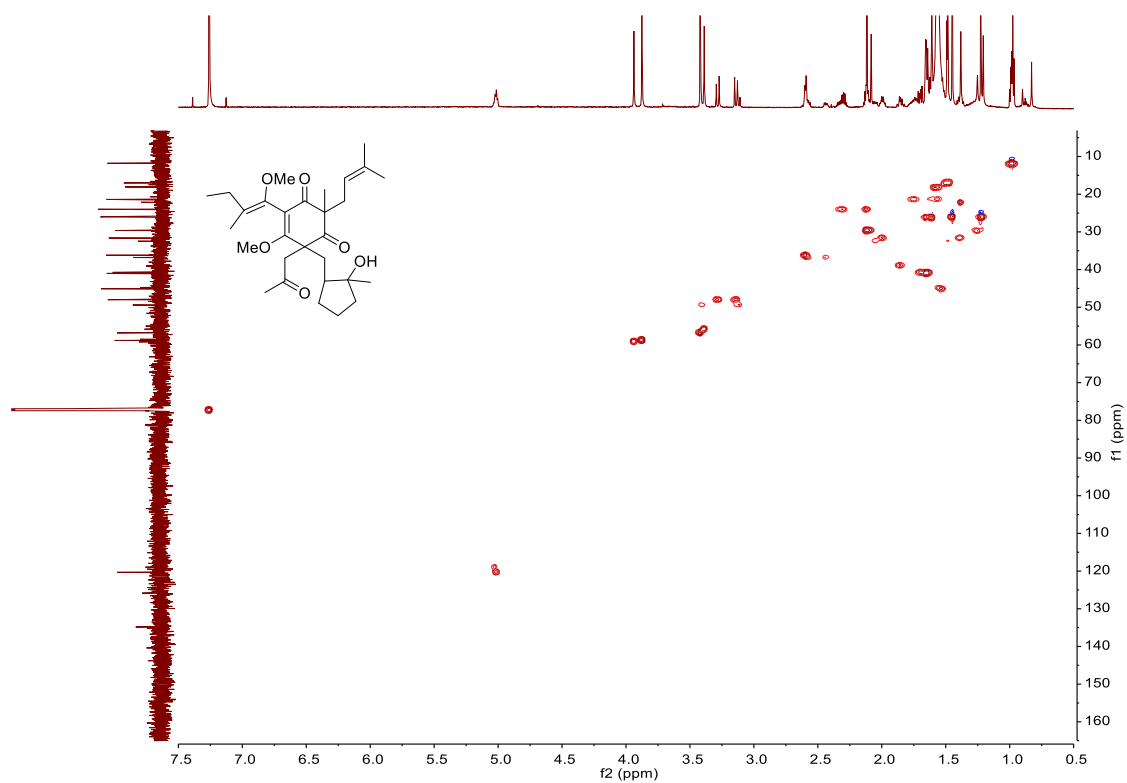

Figure S67. HMBC spectrum of compound **6** (Recorded in CDCl<sub>3</sub>, 298 K)

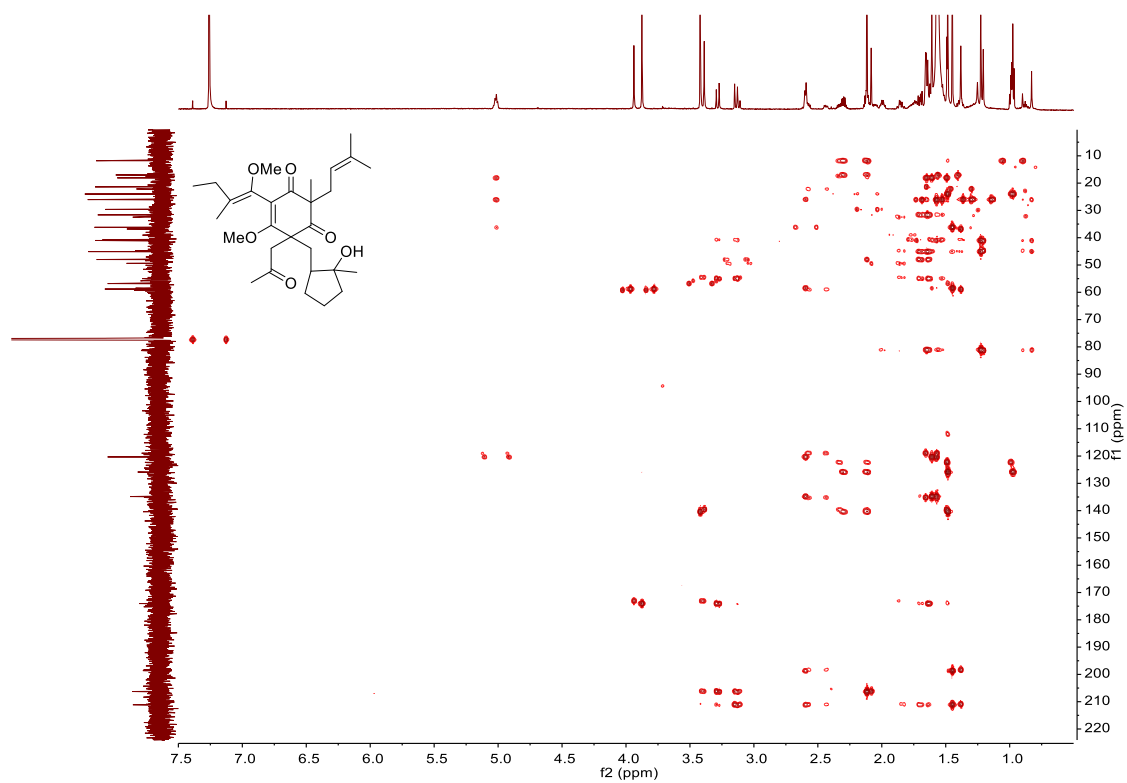

**Figure S68.** NOESY spectrum of compound **6** (Recorded in CDCl<sub>3</sub>, 298 K)

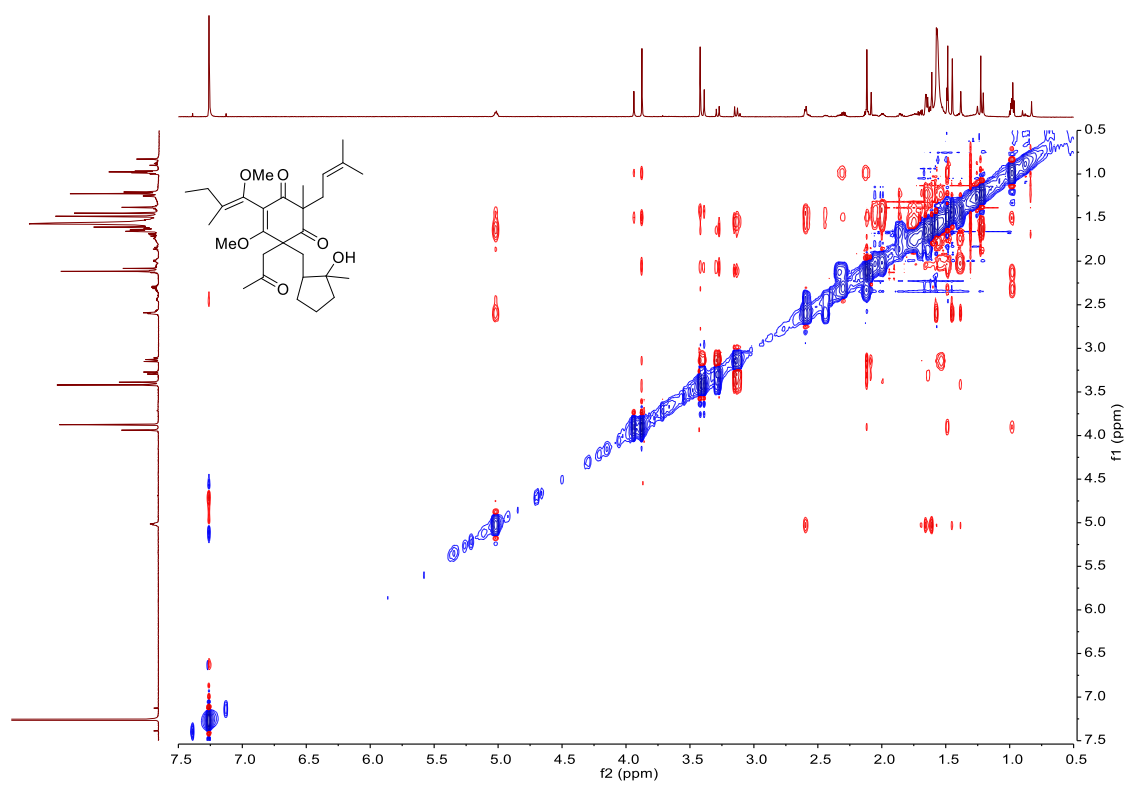



**Figure S69.** HRESIMS of compound **6**

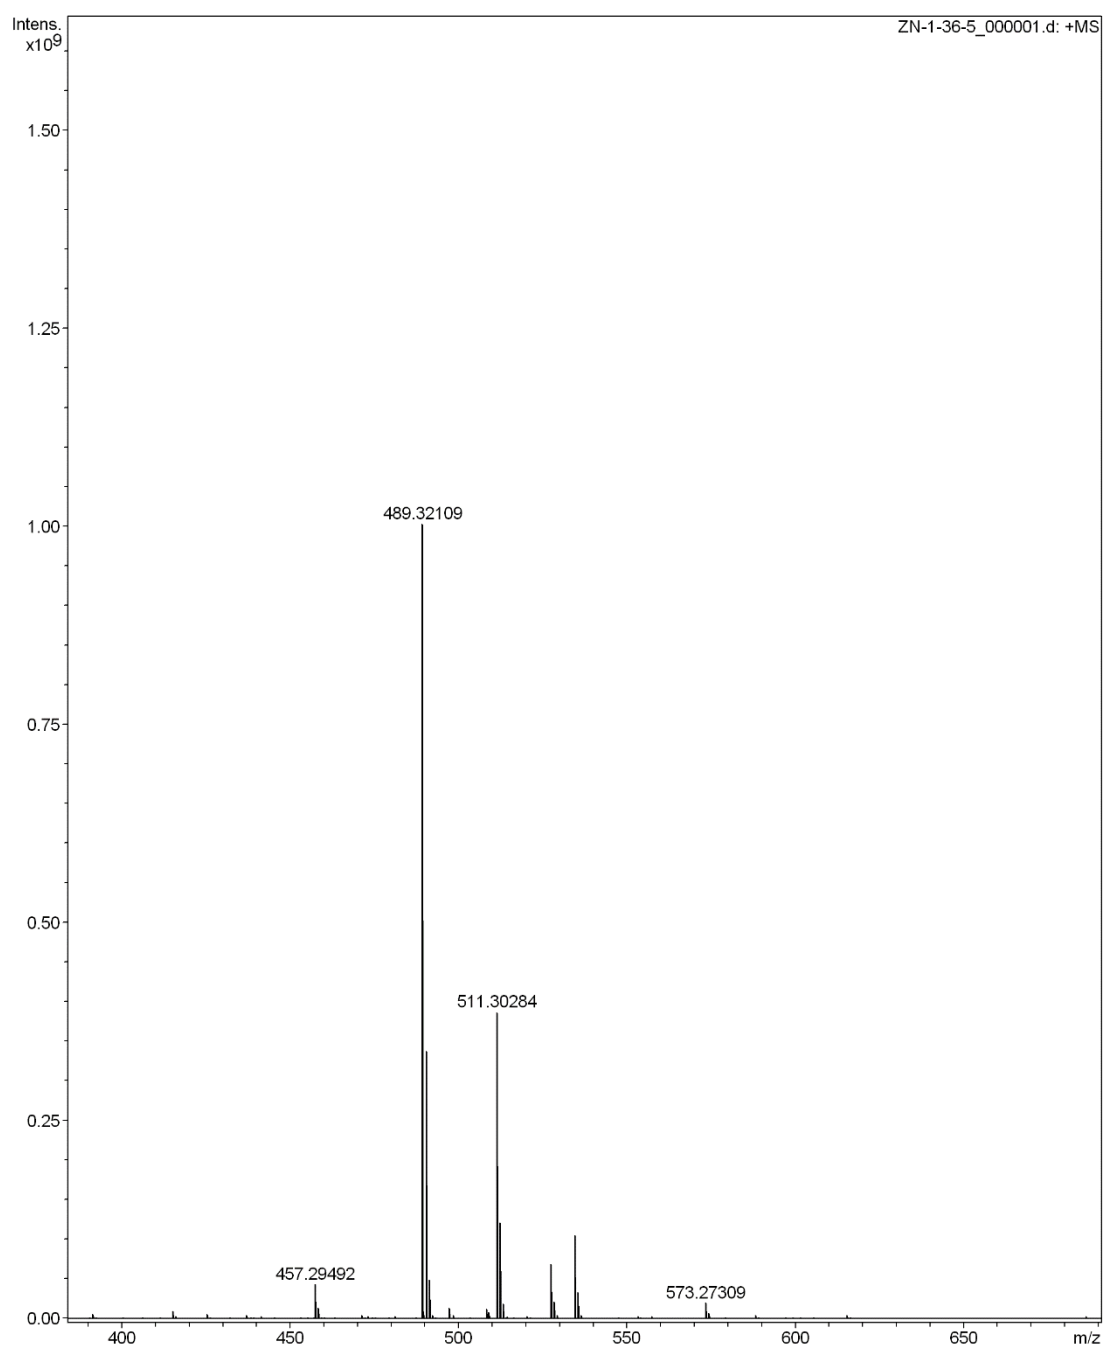

Figure S70. <sup>1</sup>H NMR (800 MHz) spectrum of compound 7 (Recorded in CDCl<sub>3</sub>, 298 K)

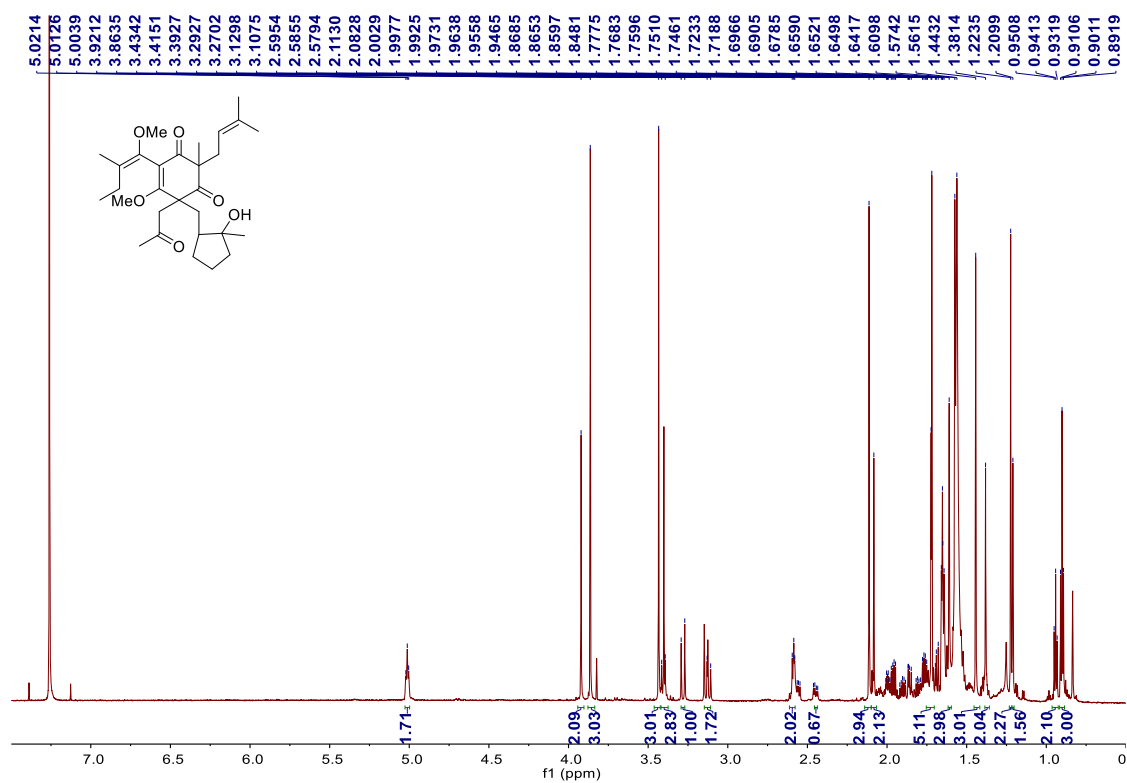

Figure S71. <sup>13</sup>C NMR (200 MHz) spectrum of compound 7 (Recorded in CDCl<sub>3</sub>, 298 K)

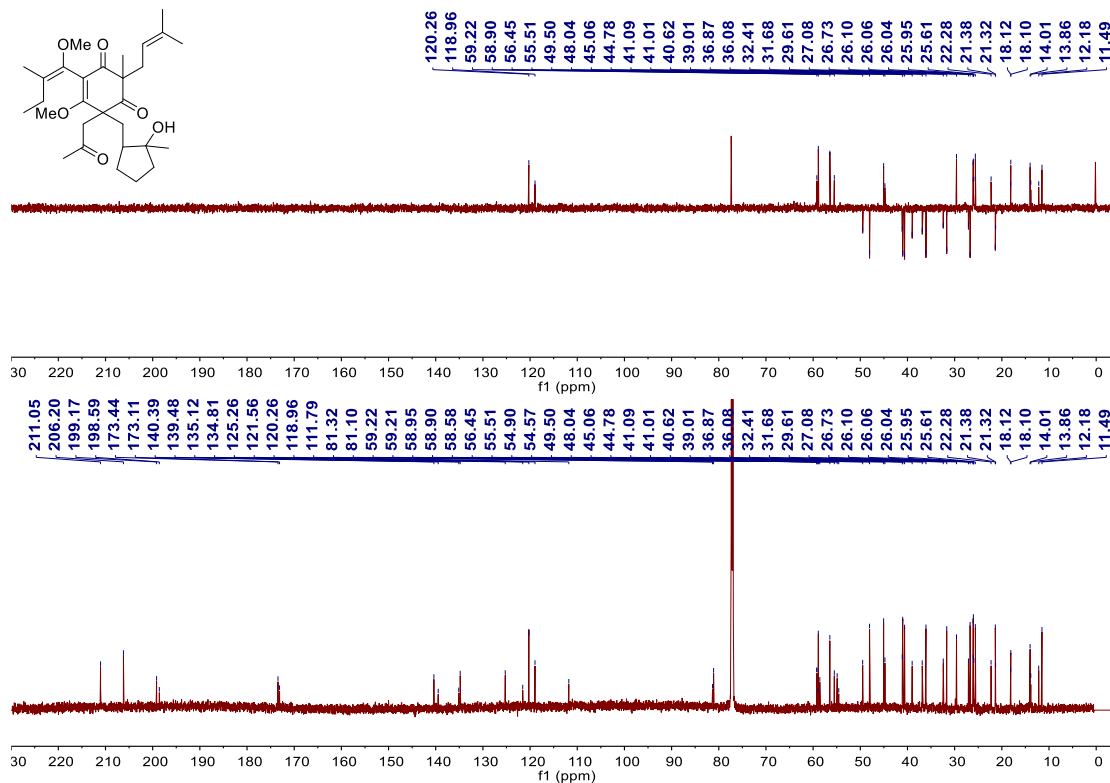

Figure S72. HSQC spectrum of compound 7 (Recorded in CDCl<sub>3</sub>, 298 K)

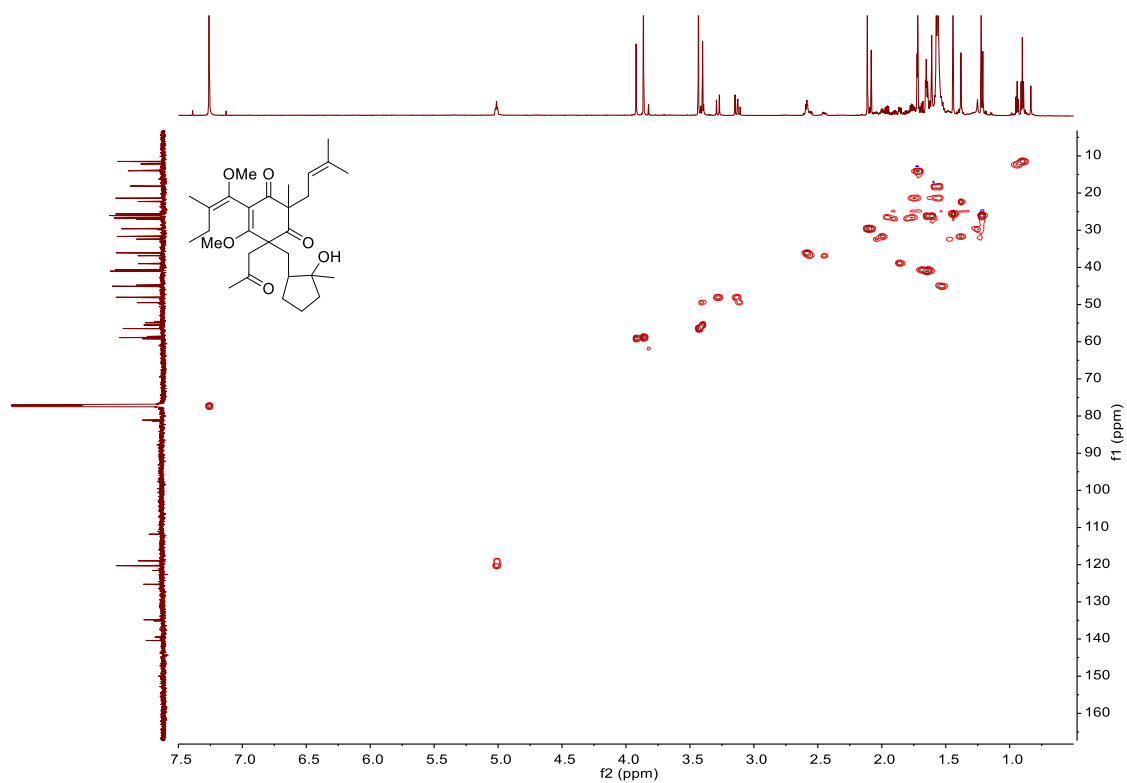

Figure S73. HMBC spectrum of compound 7 (Recorded in CDCl<sub>3</sub>, 298 K)

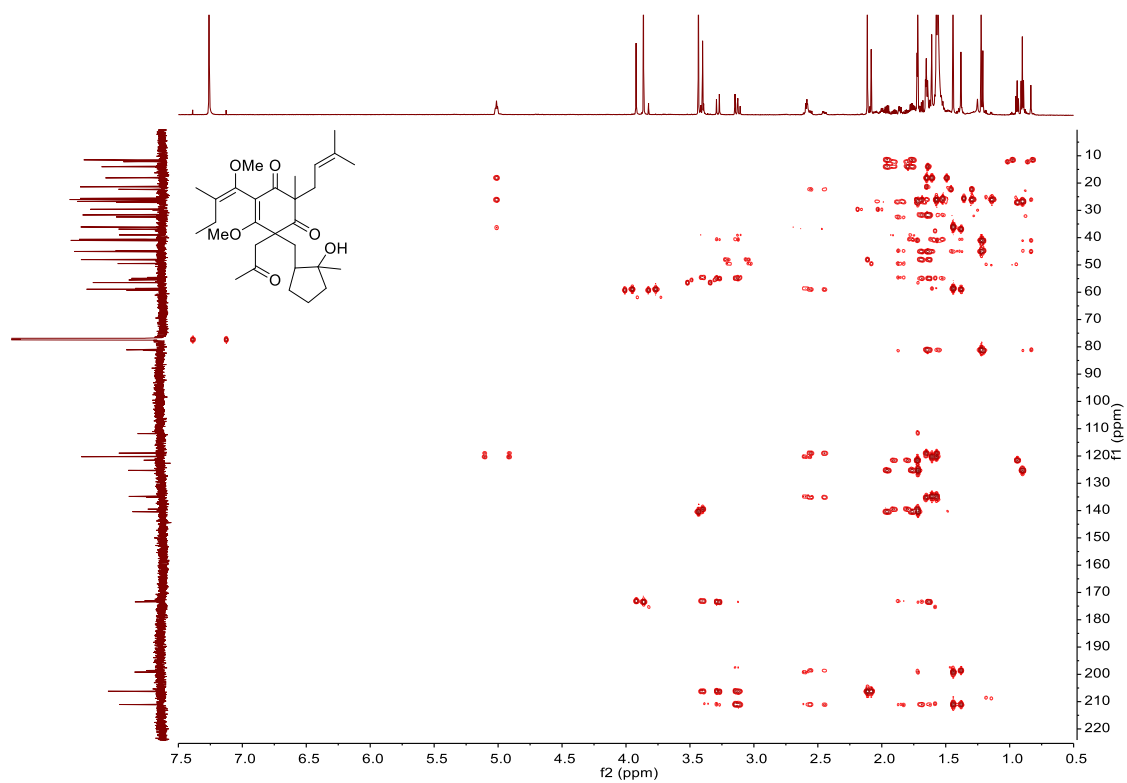

Figure S74. NOESY spectrum of compound 7 (Recorded in CDCl<sub>3</sub>, 298 K)

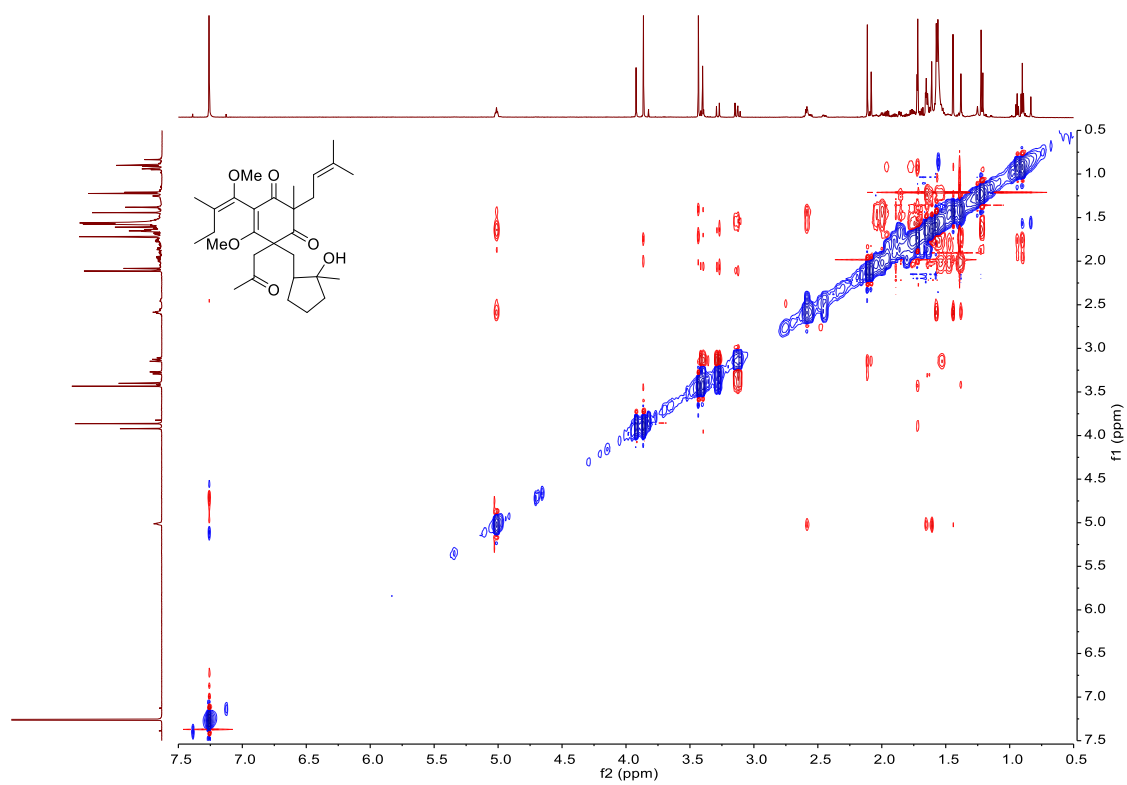

**Figure S75.** HRESIMS of compound 7

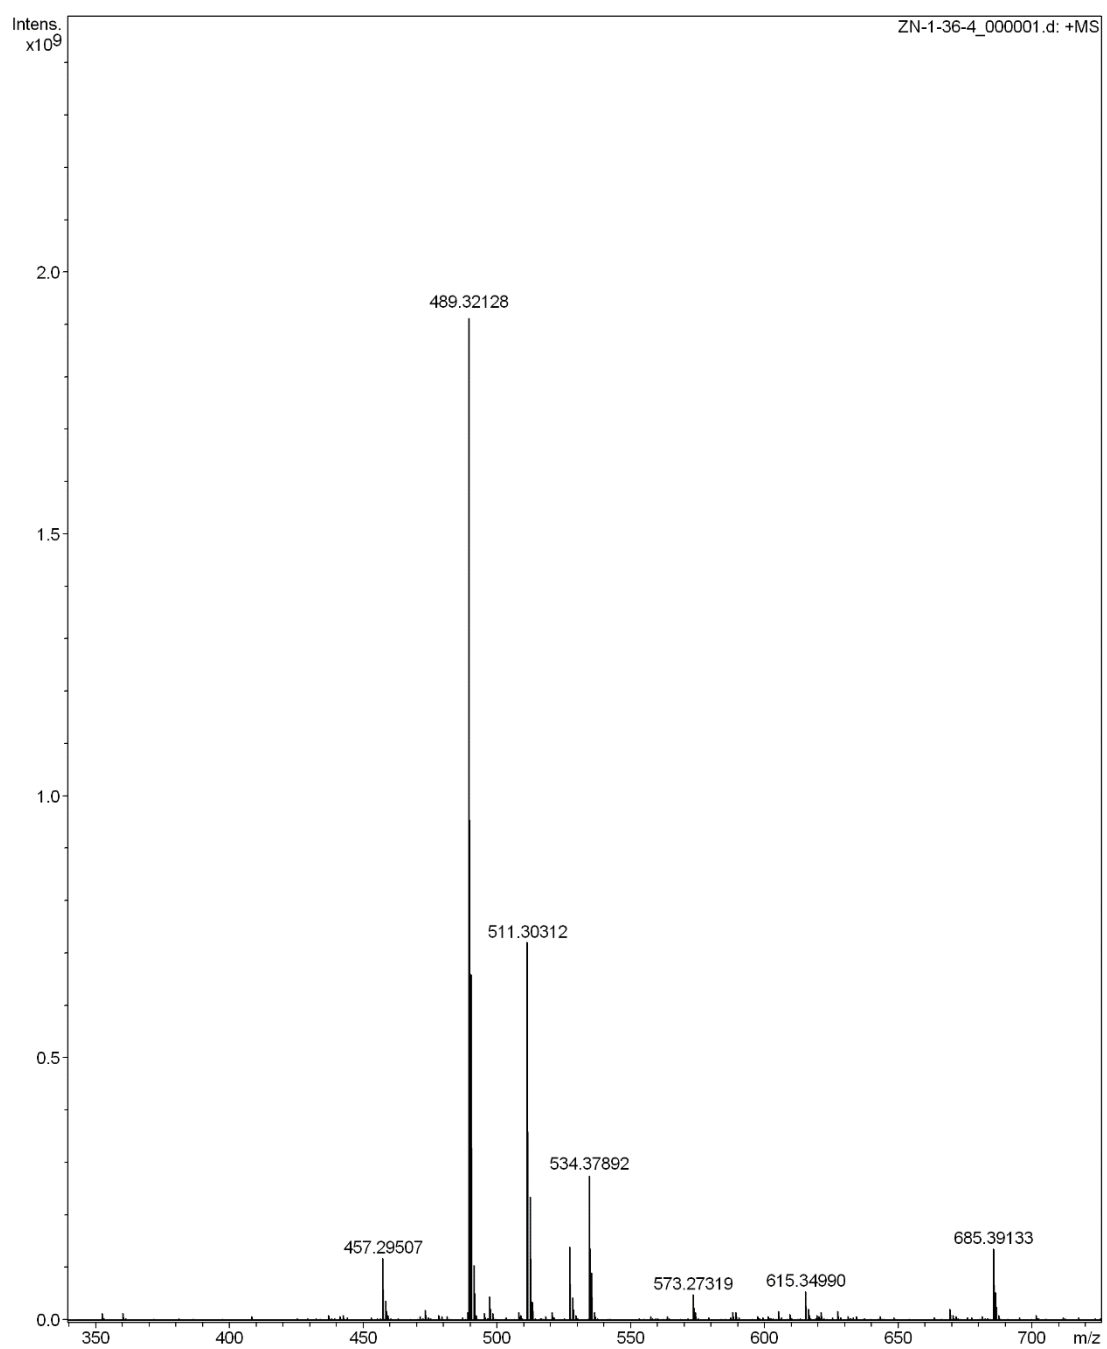

**Figure S76.**  $^1\text{H}$  NMR (800 MHz) spectrum of compound **8** (Recorded in  $\text{CDCl}_3$ , 298 K)

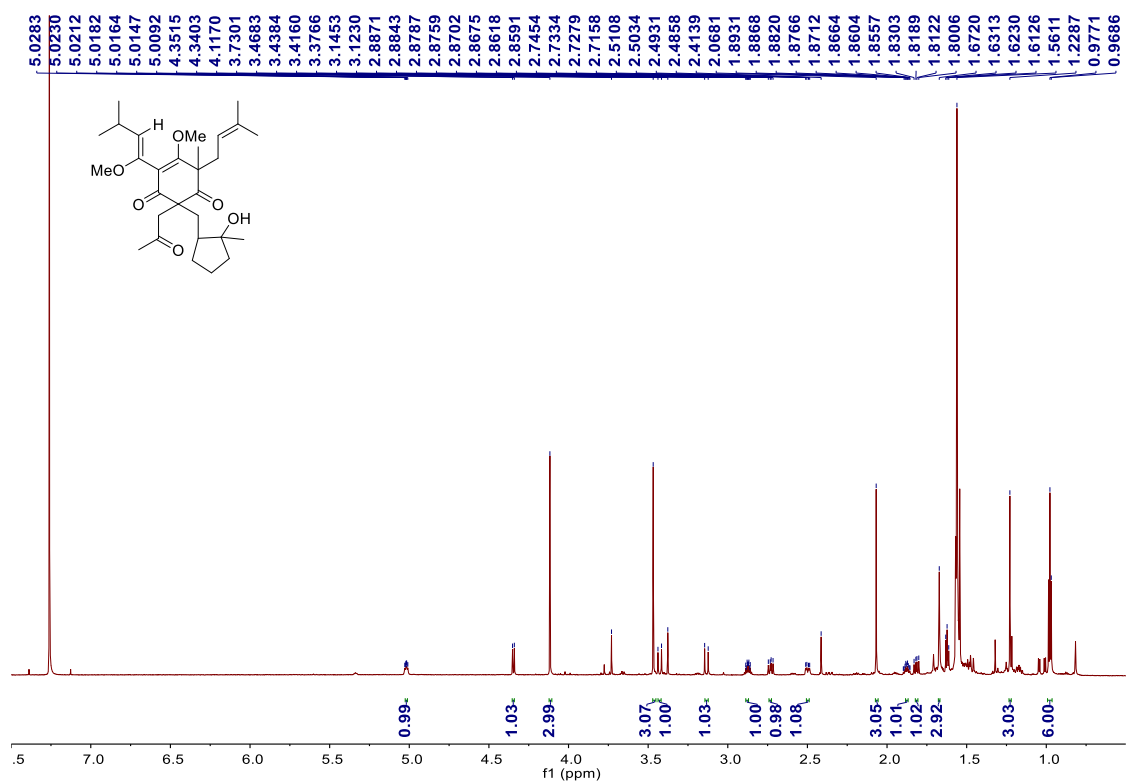

**Figure S77.**  $^{13}\text{C}$  NMR (200 MHz) spectrum of compound **8** (Recorded in  $\text{CDCl}_3$ , 298 K)

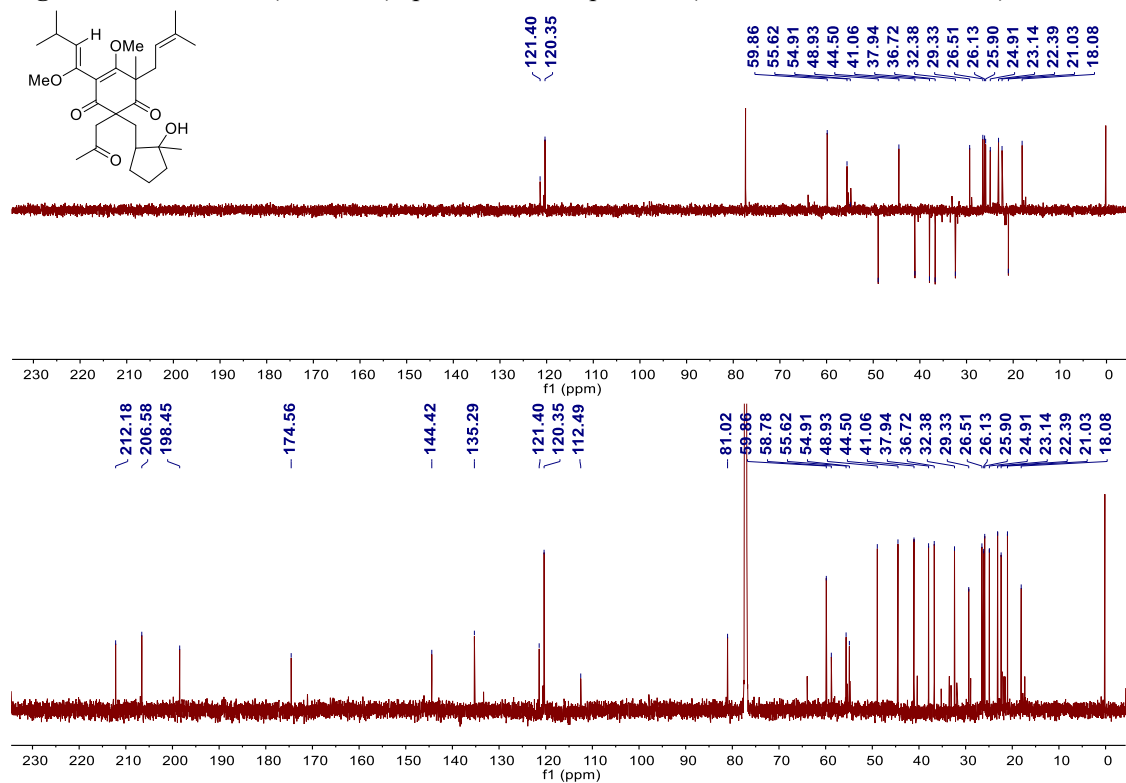

**Figure S78.** HSQC spectrum of compound **8** (Recorded in CDCl<sub>3</sub>, 298 K)

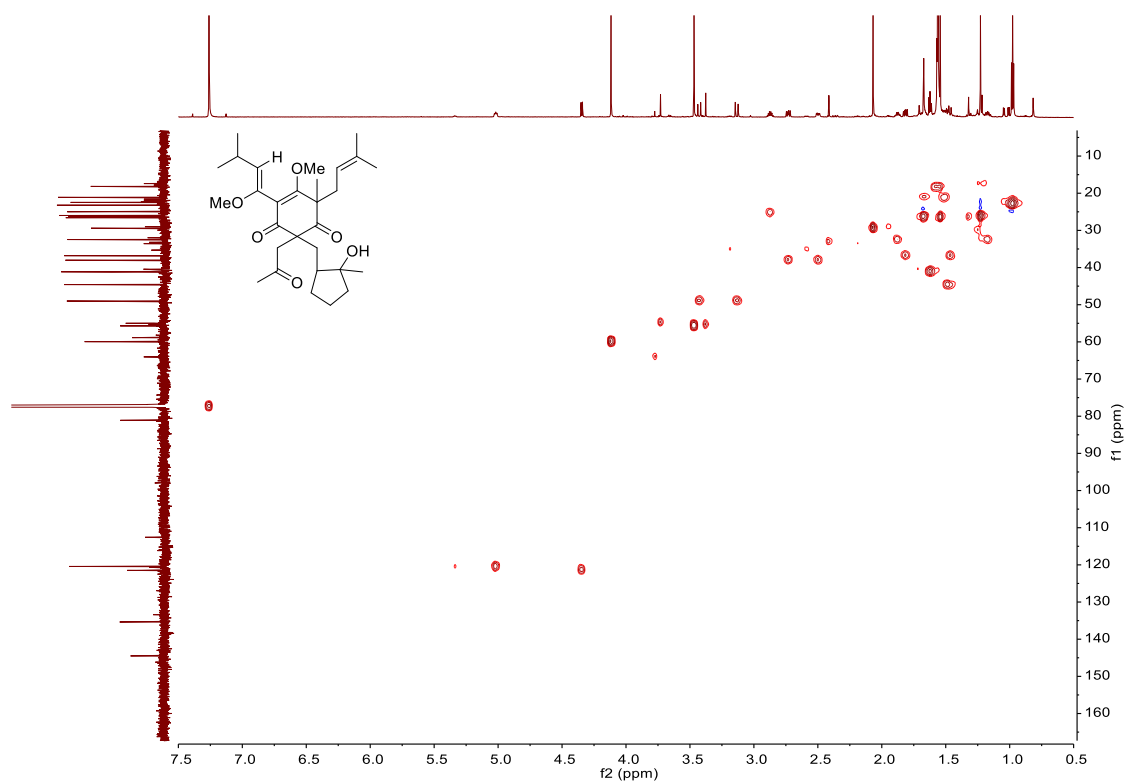

**Figure S79.** <sup>1</sup>H-<sup>1</sup>H COSY spectrum of compound **8** (Recorded in CDCl<sub>3</sub>, 298 K)

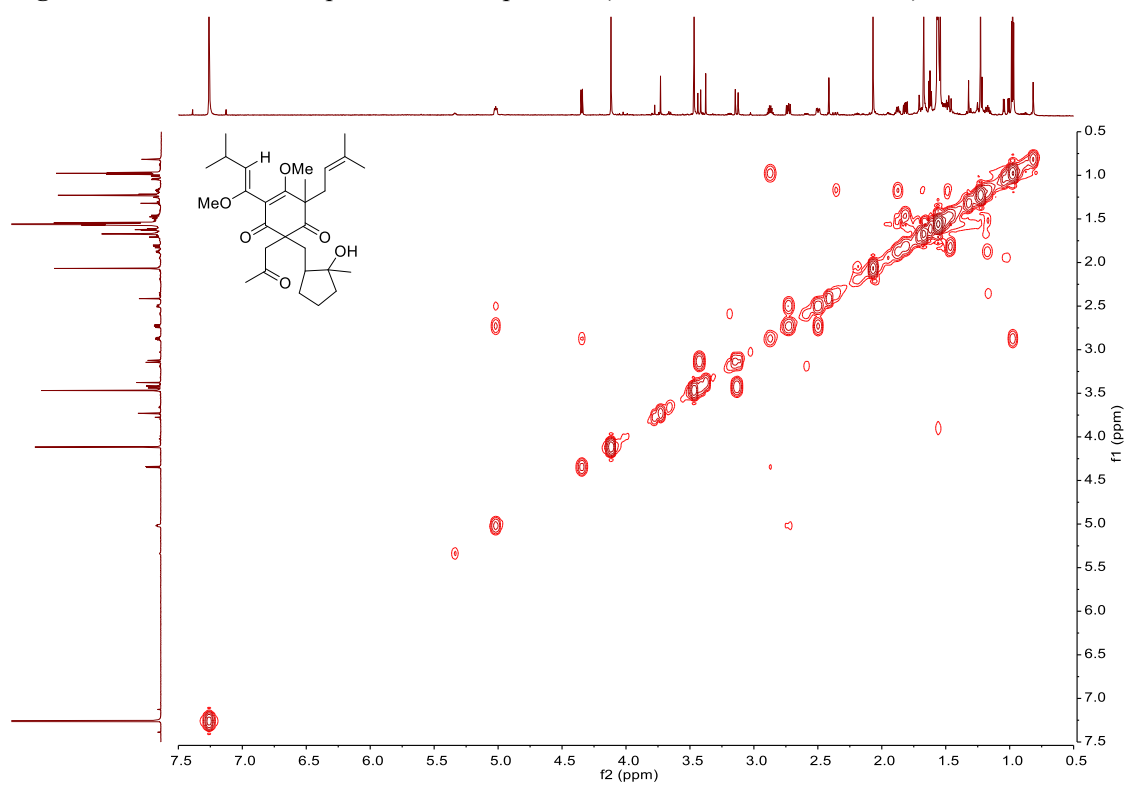

**Figure S80.** HMBC spectrum of compound **8** (Recorded in CDCl<sub>3</sub>, 298 K)

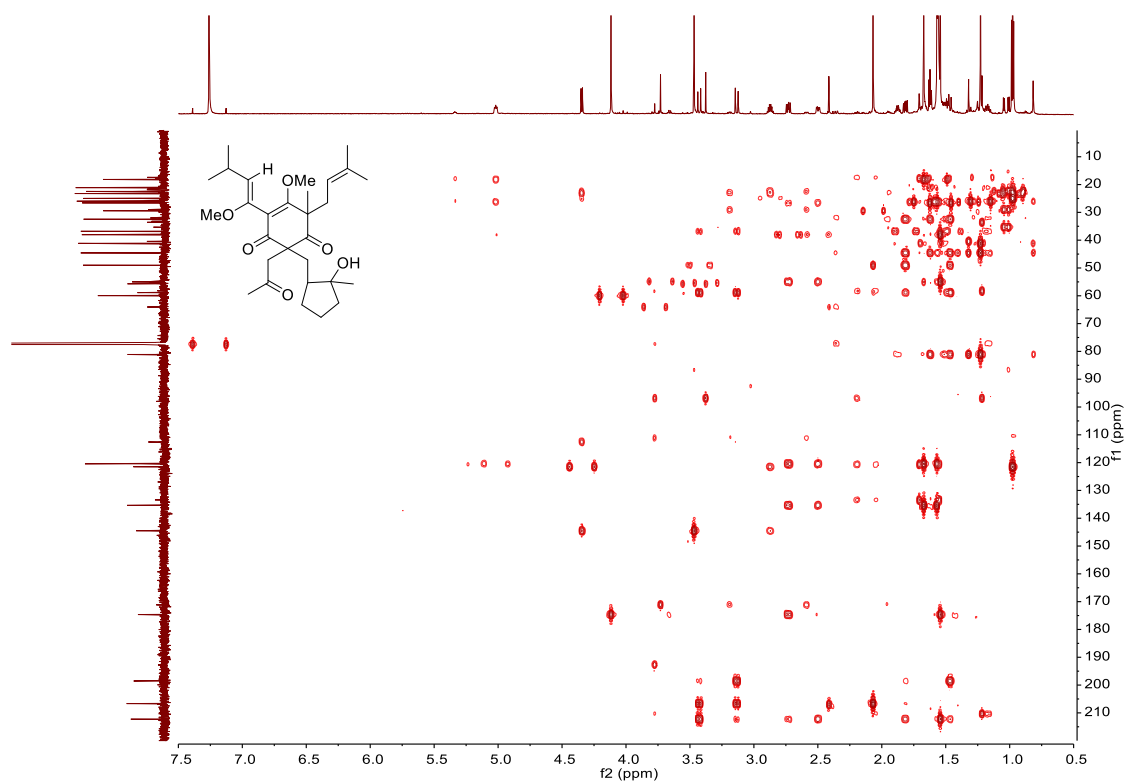

**Figure S81.** NOESY spectrum of compound **8** (Recorded in CDCl<sub>3</sub>, 298 K)

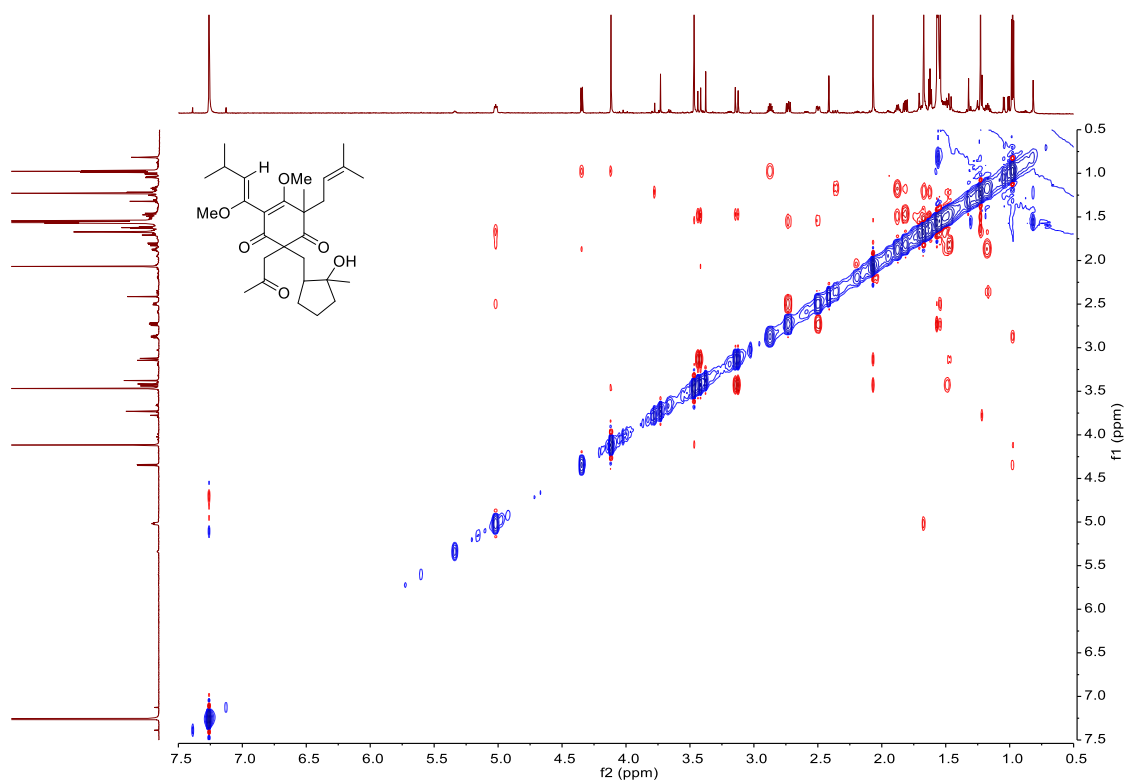



**Figure S82.** HRESIMS of compound **8**

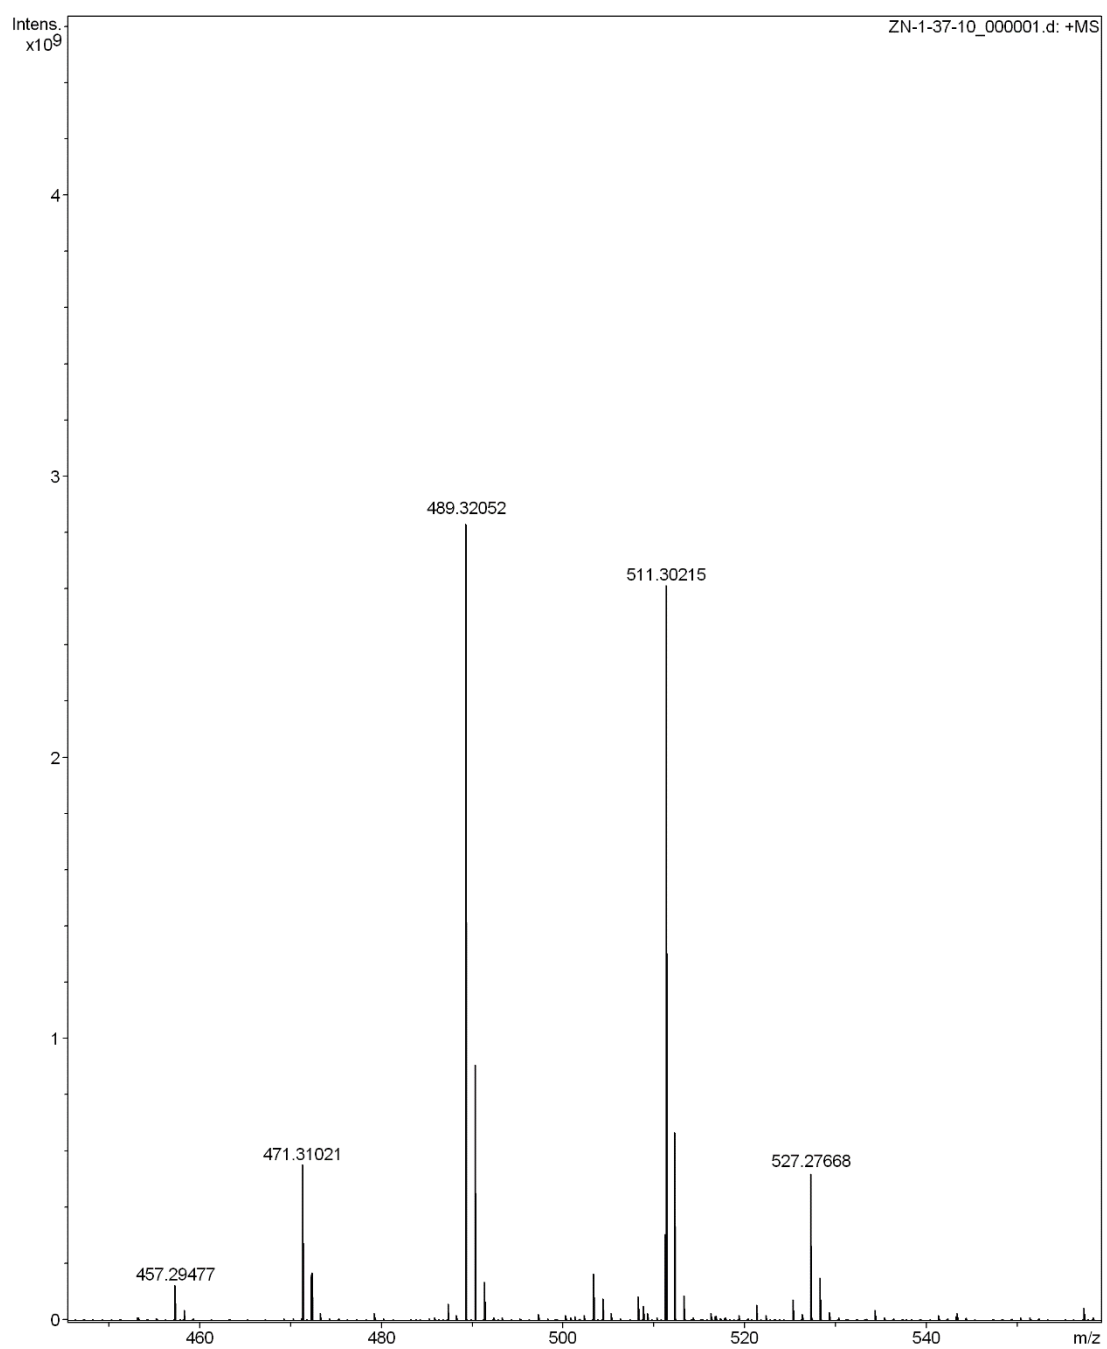

**Figure S83.**  $^1\text{H}$  NMR (600 MHz) spectrum of compound **9** (Recorded in  $\text{CDCl}_3$ , 298 K)

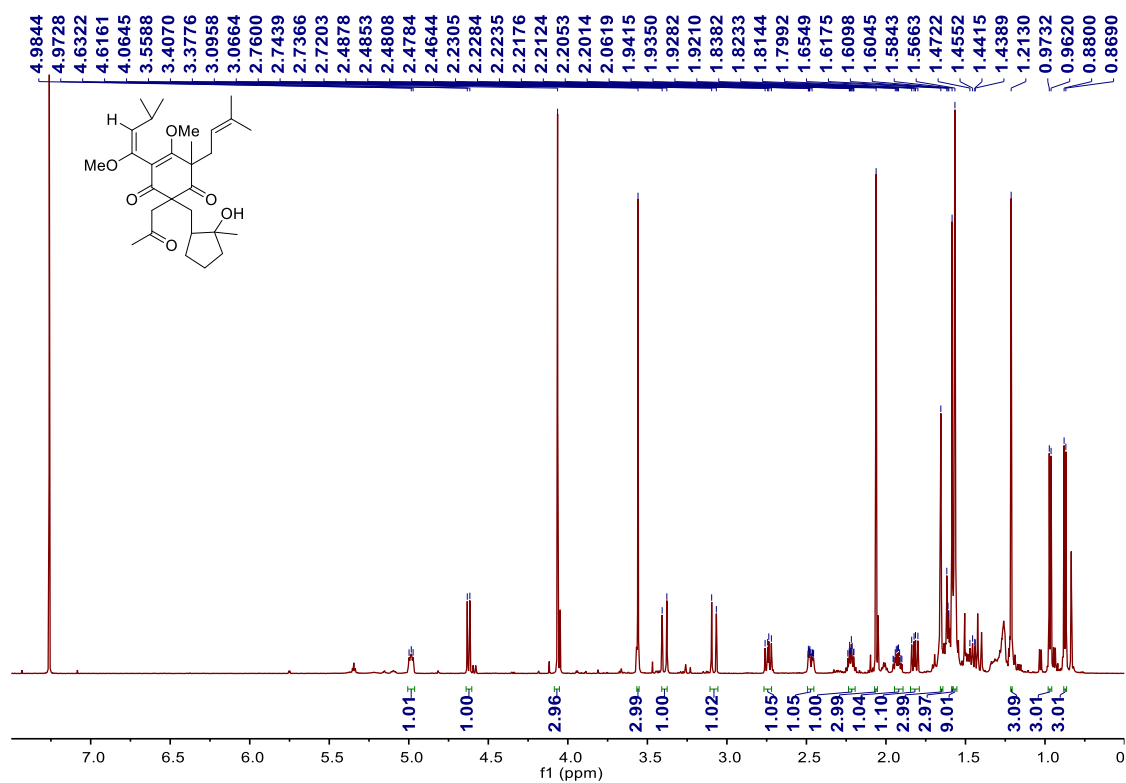

**Figure S84.**  $^{13}\text{C}$  NMR (150 MHz) spectrum of compound **9** (Recorded in  $\text{CDCl}_3$ , 298 K)

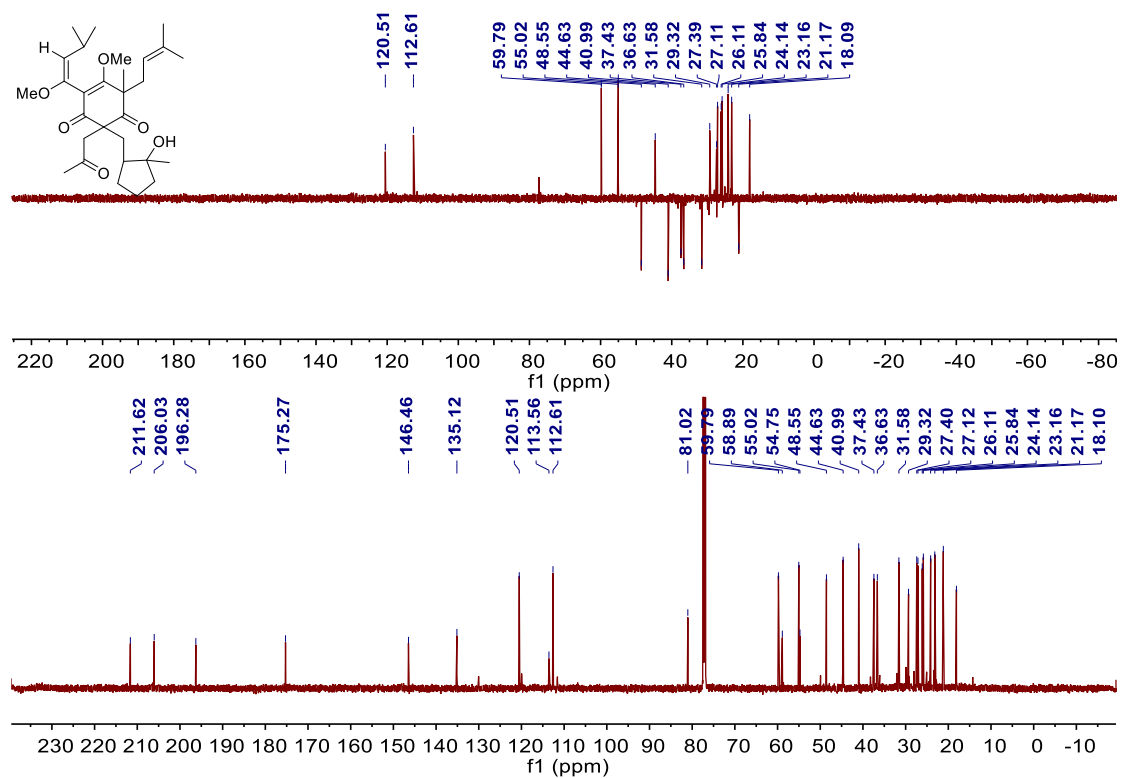

**Figure S85.** HSQC spectrum of compound **9** (Recorded in CDCl<sub>3</sub>, 298 K)

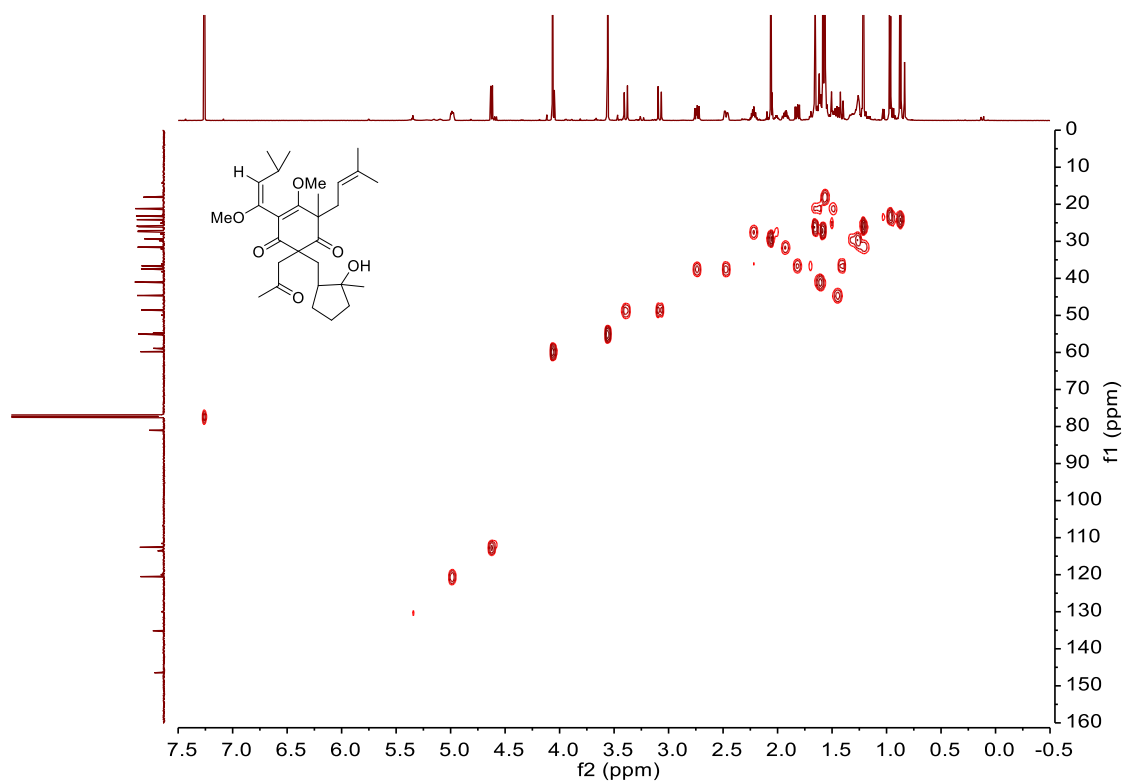

**Figure S86.** <sup>1</sup>H-<sup>1</sup>H COSY spectrum of compound **9** (Recorded in CDCl<sub>3</sub>, 298 K)

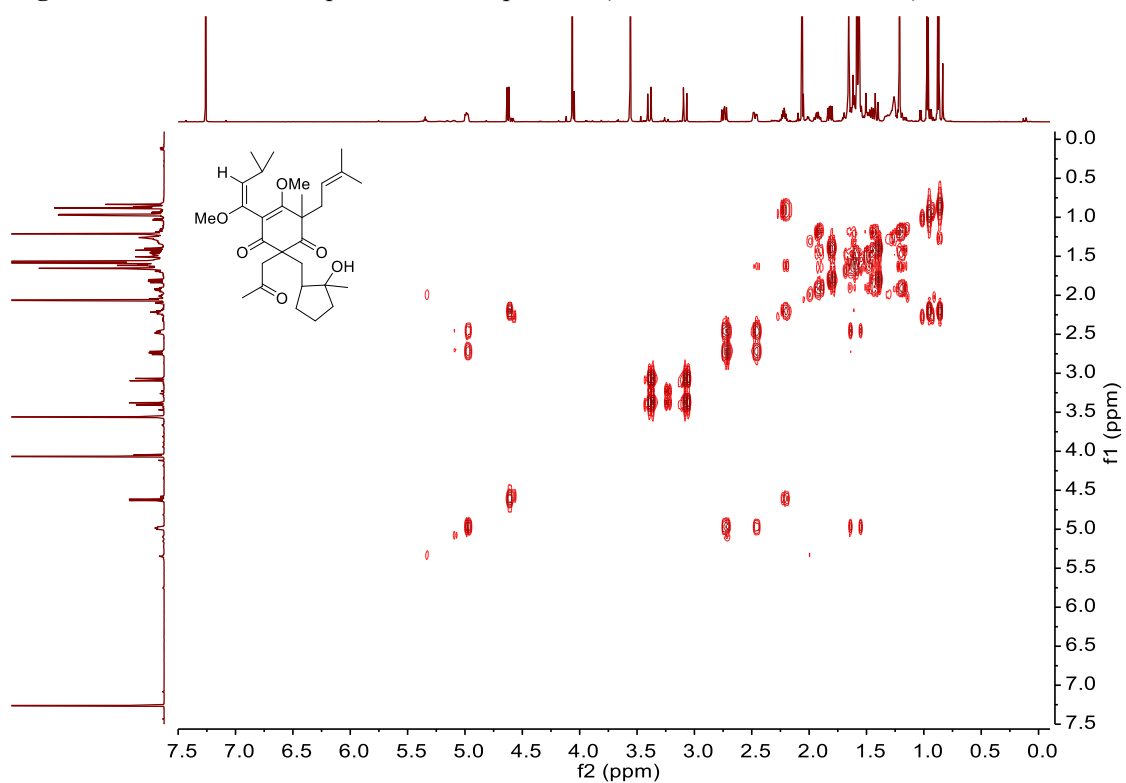

Figure S87. HMBC spectrum of compound **9** (Recorded in CDCl<sub>3</sub>, 298 K)

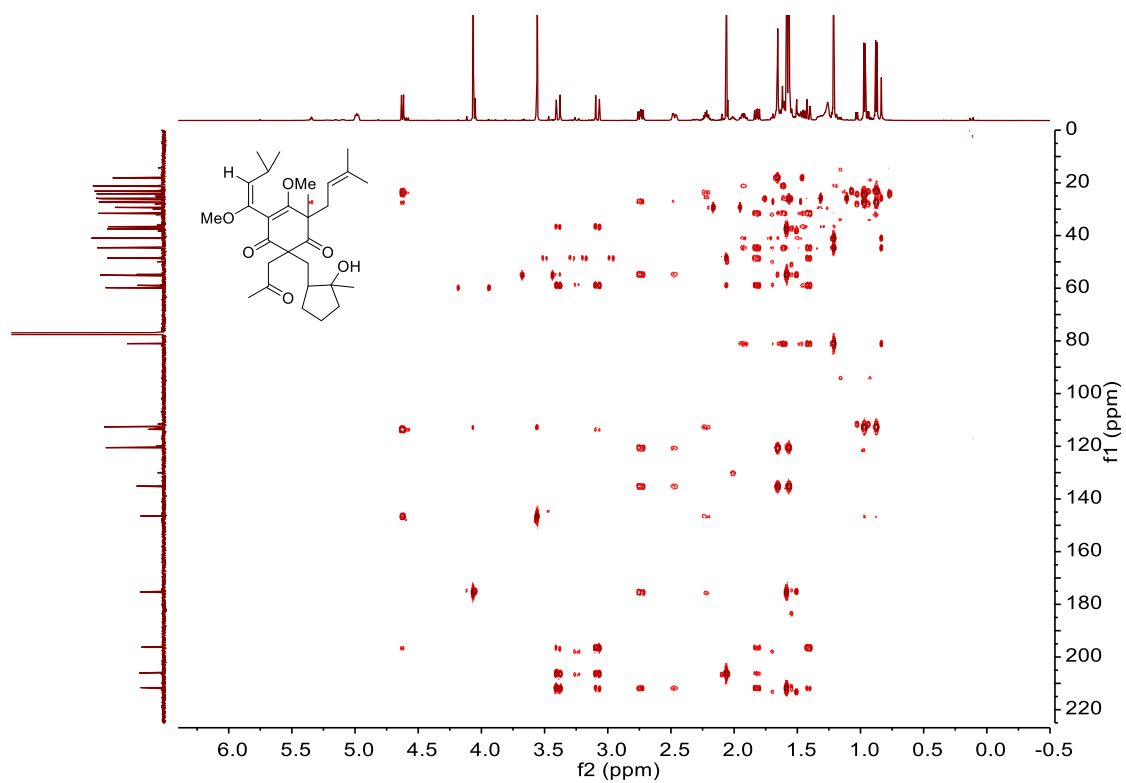

Figure S88. NOESY spectrum of compound **9** (Recorded in CDCl<sub>3</sub>, 298 K)

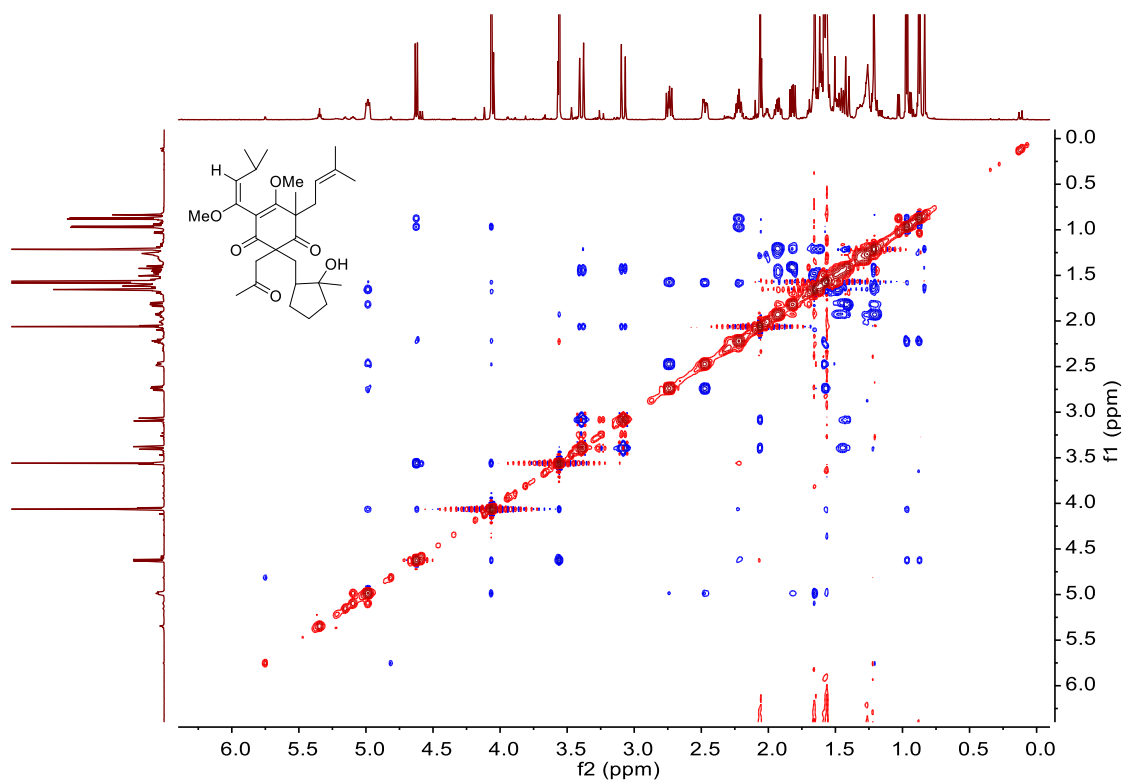

**Figure S89.** HRESIMS compound **9**

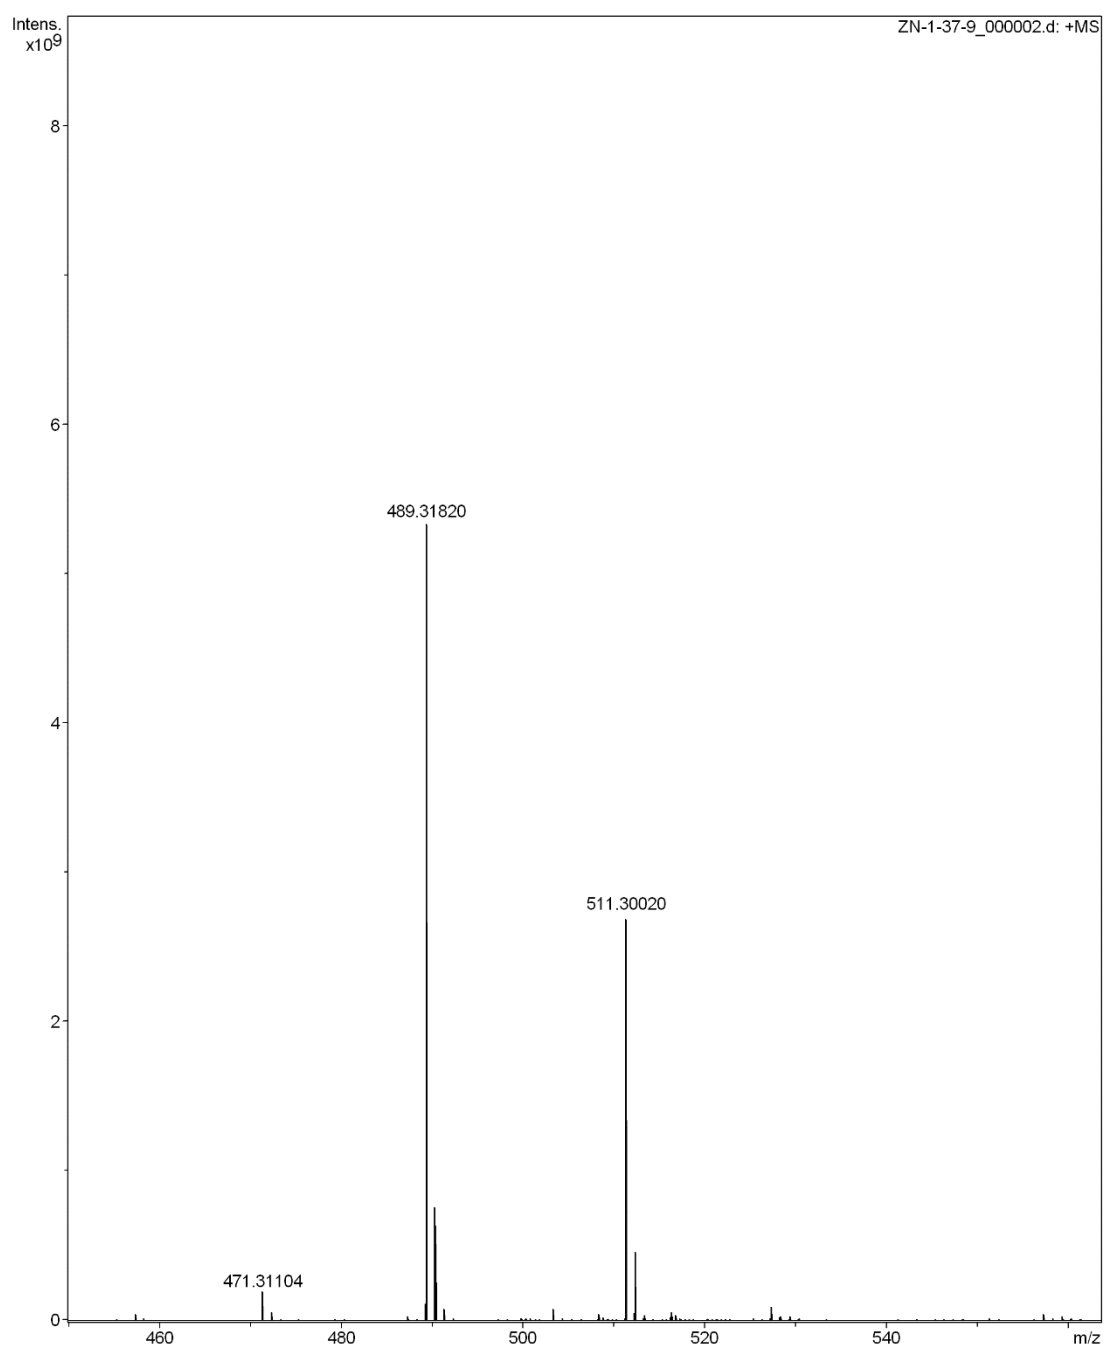

**Figure S90.**  $^1\text{H}$  NMR (800 MHz) spectrum of compound **10** (Recorded in  $\text{CDCl}_3$ , 298 K)

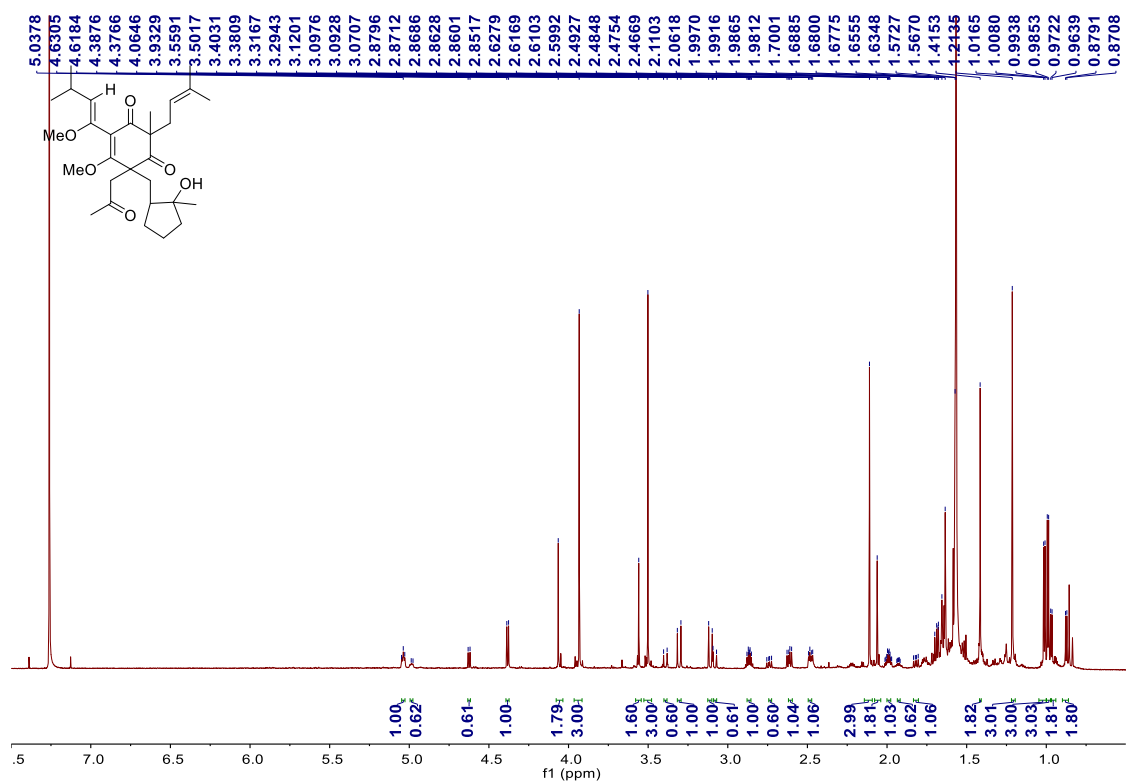

**Figure S91.**  $^{13}\text{C}$  NMR (200 MHz) spectrum of compound **10** (Recorded in  $\text{CDCl}_3$ , 298 K)

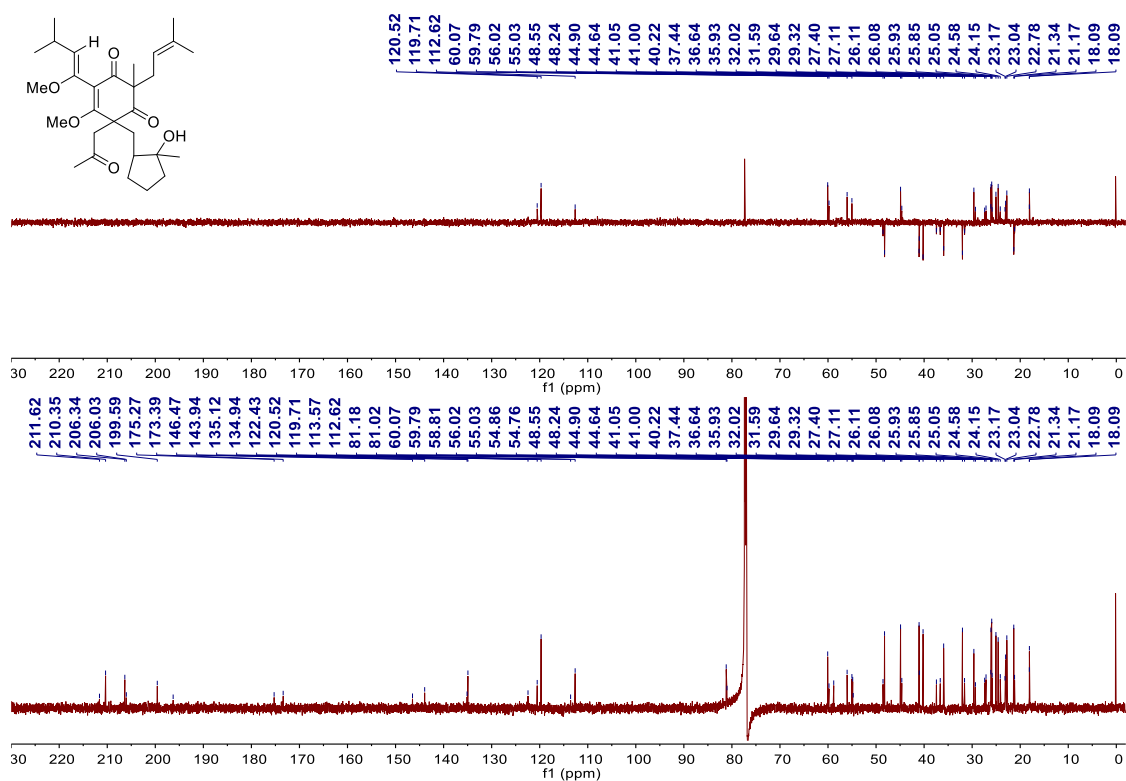

Figure S92. HSQC spectrum of compound **10** (Recorded in CDCl<sub>3</sub>, 298 K)

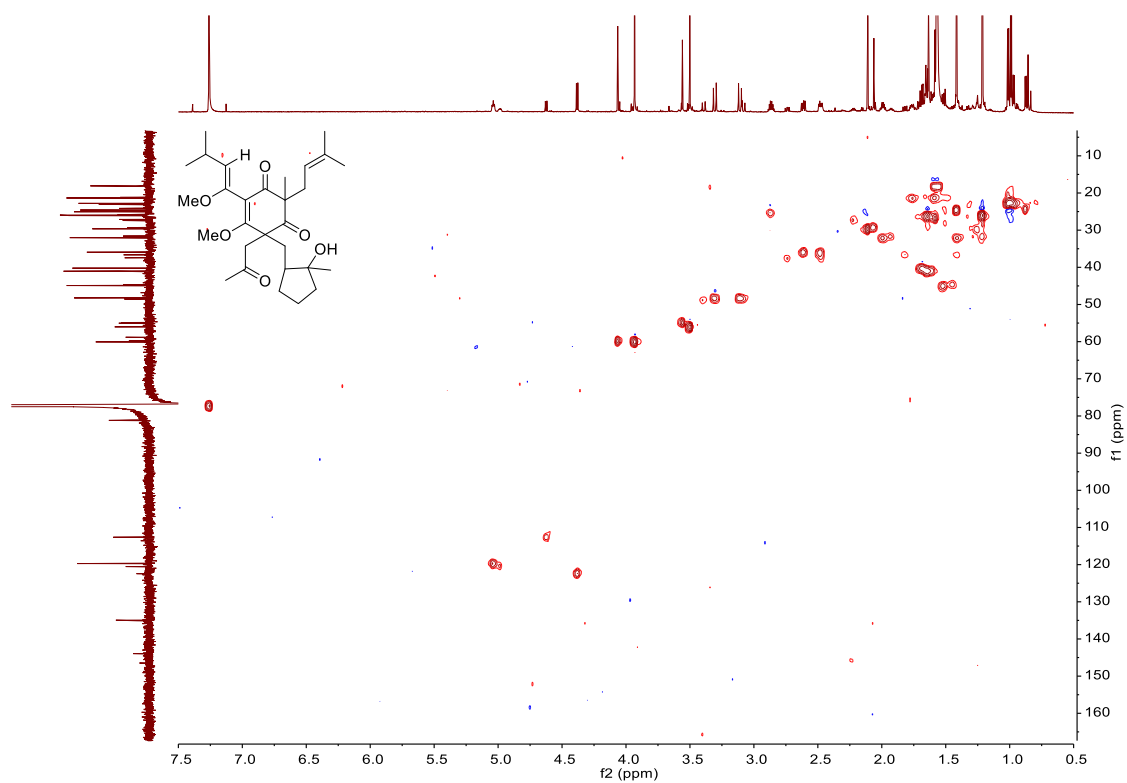

Figure S93. <sup>1</sup>H-<sup>1</sup>H COSY spectrum of compound **10** (Recorded in CDCl<sub>3</sub>, 298 K)

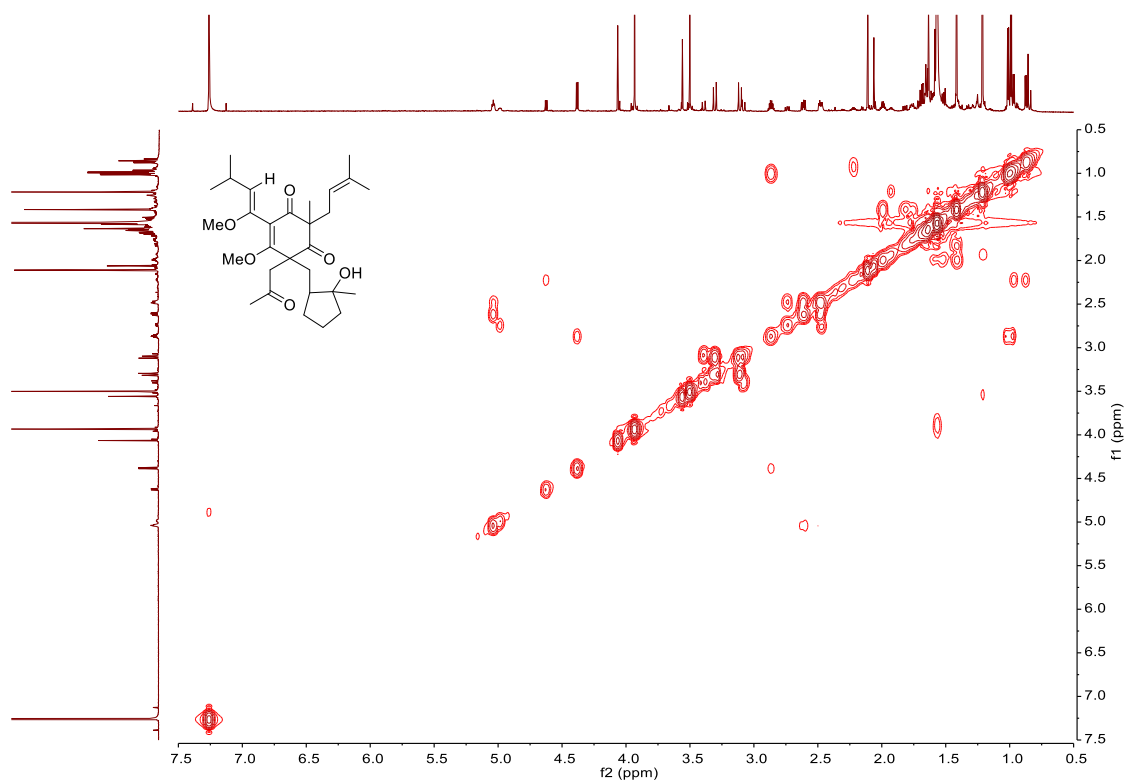

Figure S94. HMBC spectrum of compound **10** (Recorded in CDCl<sub>3</sub>, 298 K)

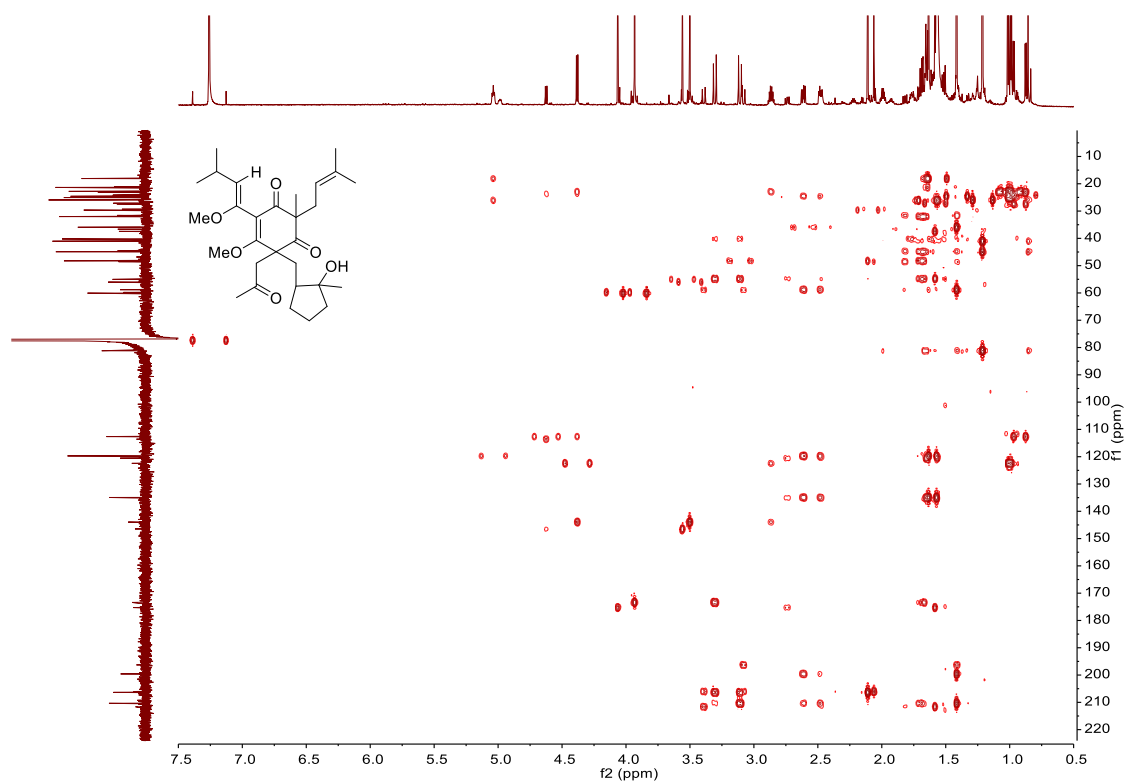

Figure S95. NOESY spectrum of compound **10** (Recorded in CDCl<sub>3</sub>, 298 K)

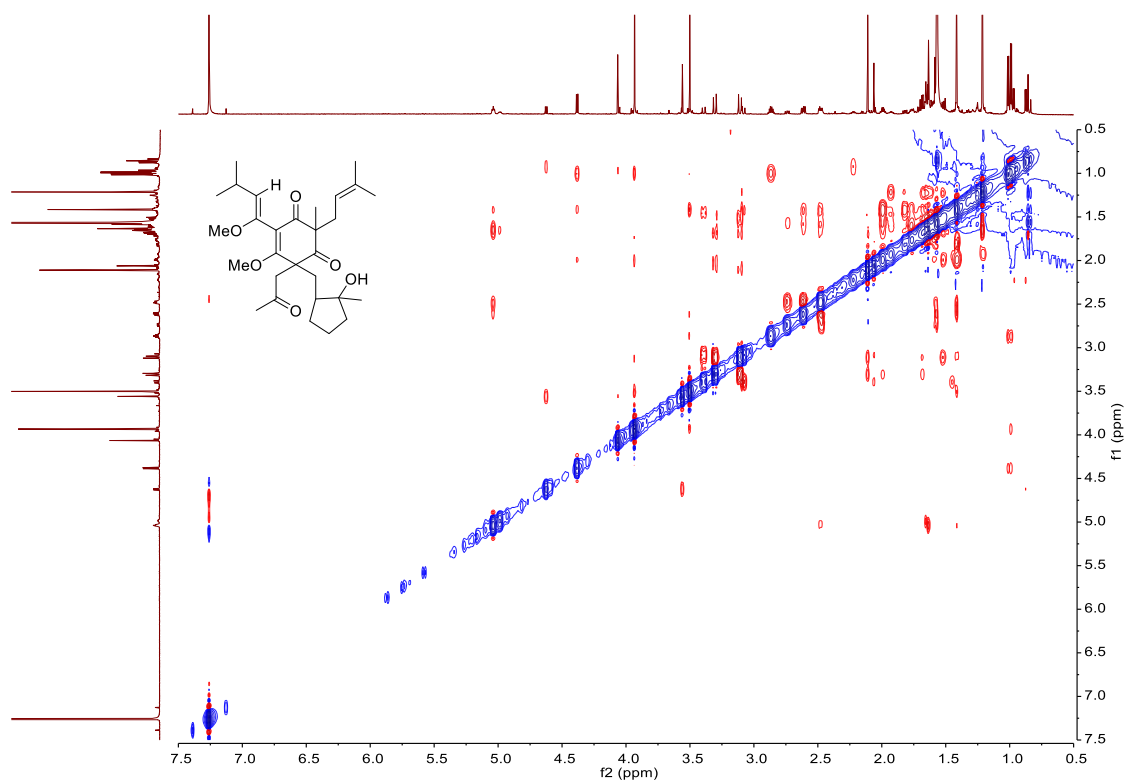



**Figure S96.** HRESIMS of compound **10**

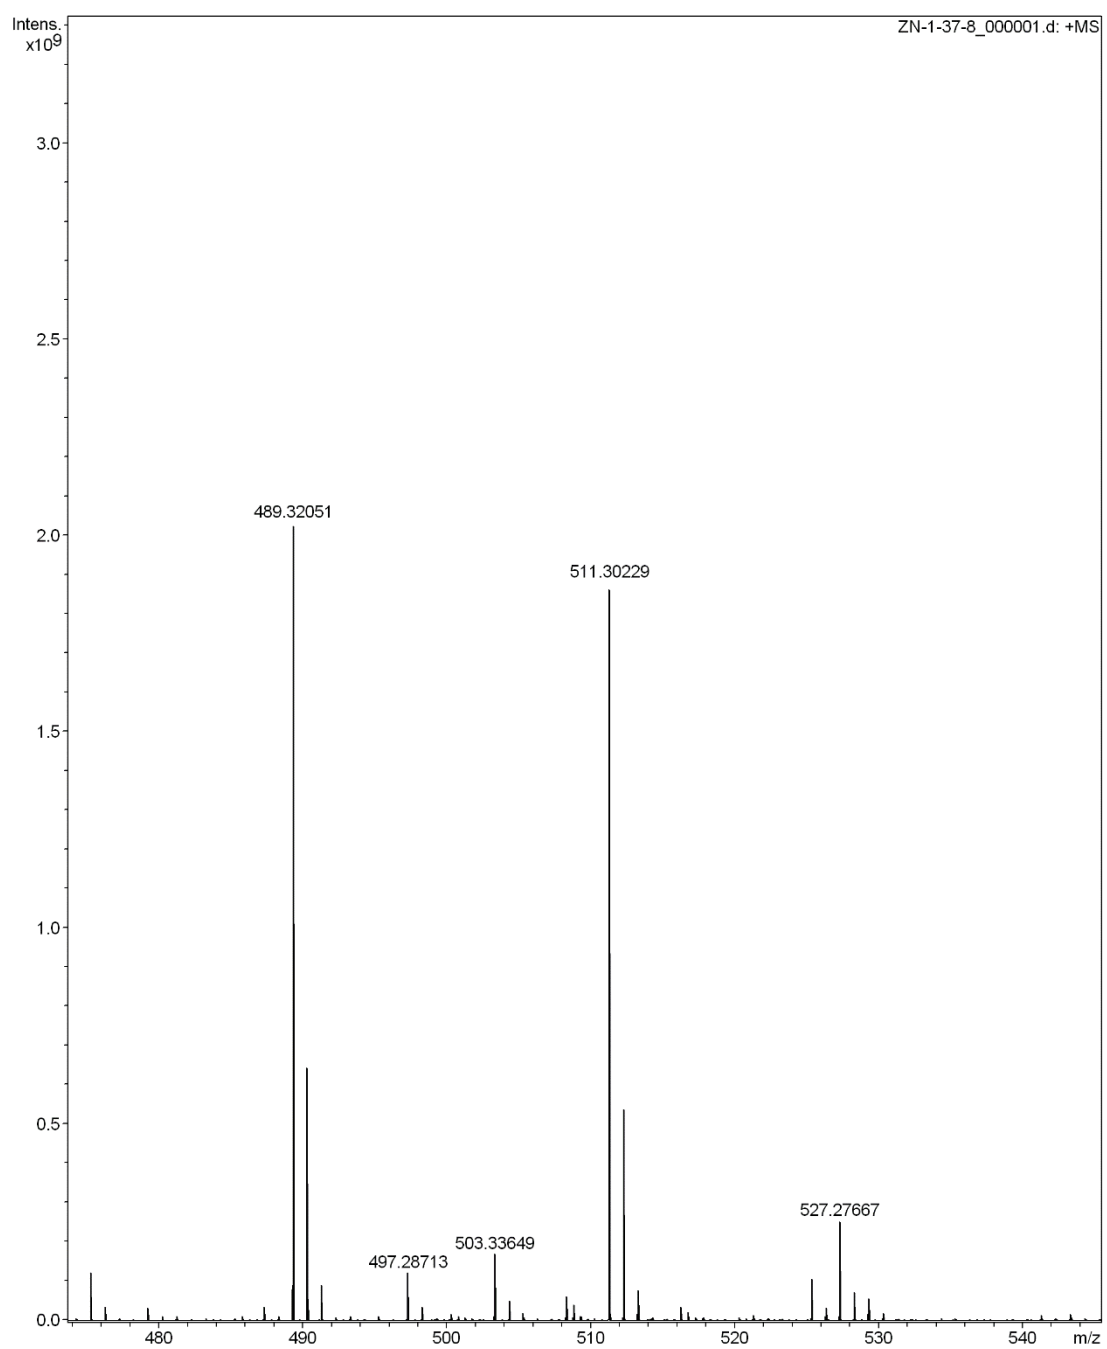

**Figure S97.**  $^1\text{H}$  NMR (800 MHz) spectrum of compound **11** (Recorded in  $\text{CDCl}_3$ , 298 K)

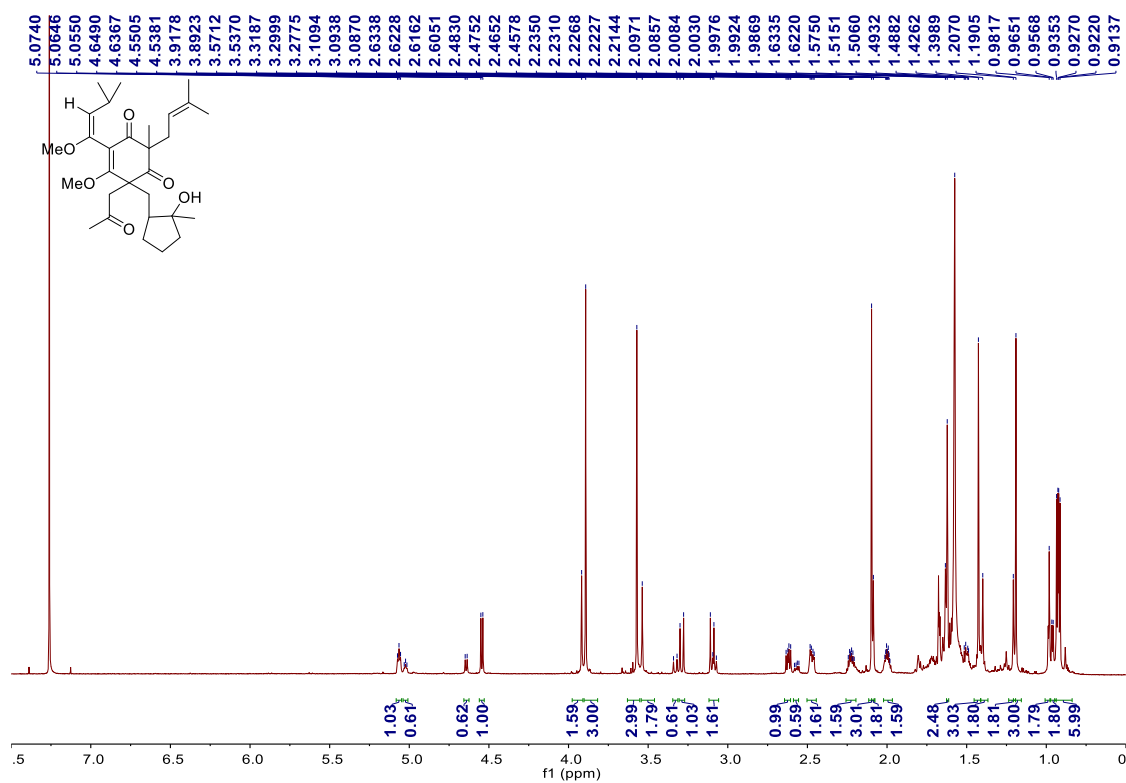

**Figure S98.**  $^{13}\text{C}$  NMR (200 MHz) spectrum of compound **11** (Recorded in  $\text{CDCl}_3$ , 298 K)

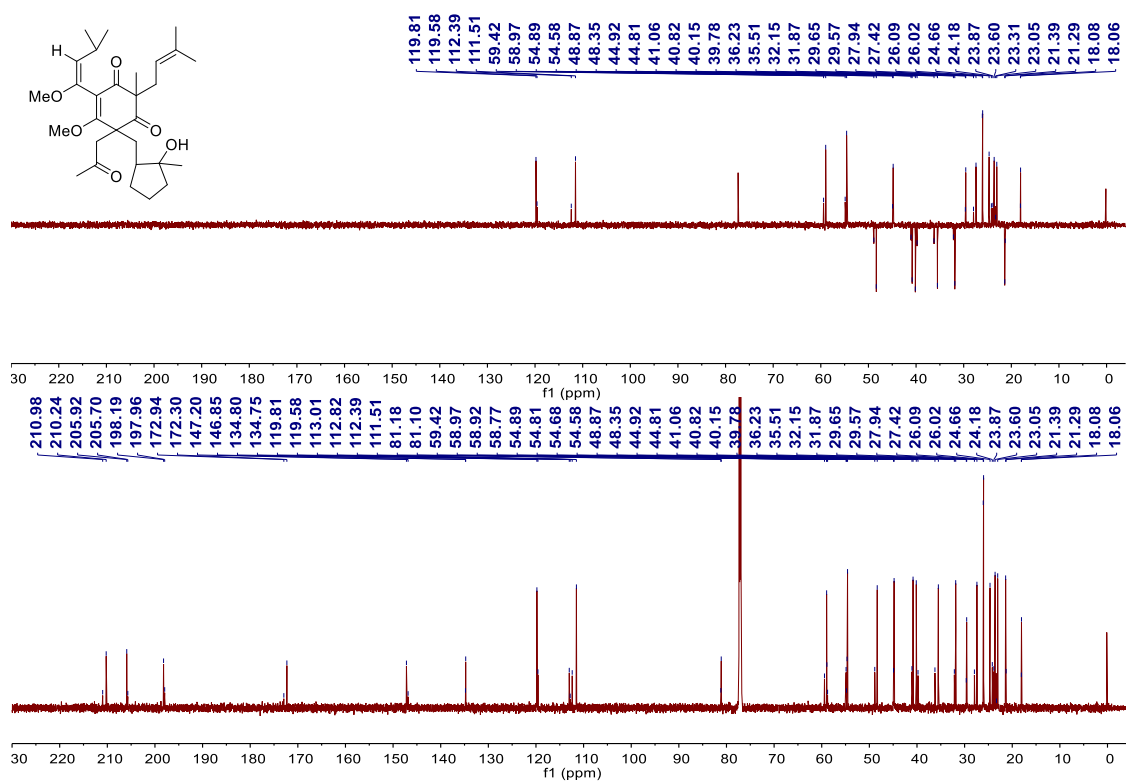

**Figure S99.** HSQC spectrum of compound **11** (Recorded in CDCl<sub>3</sub>, 298 K)

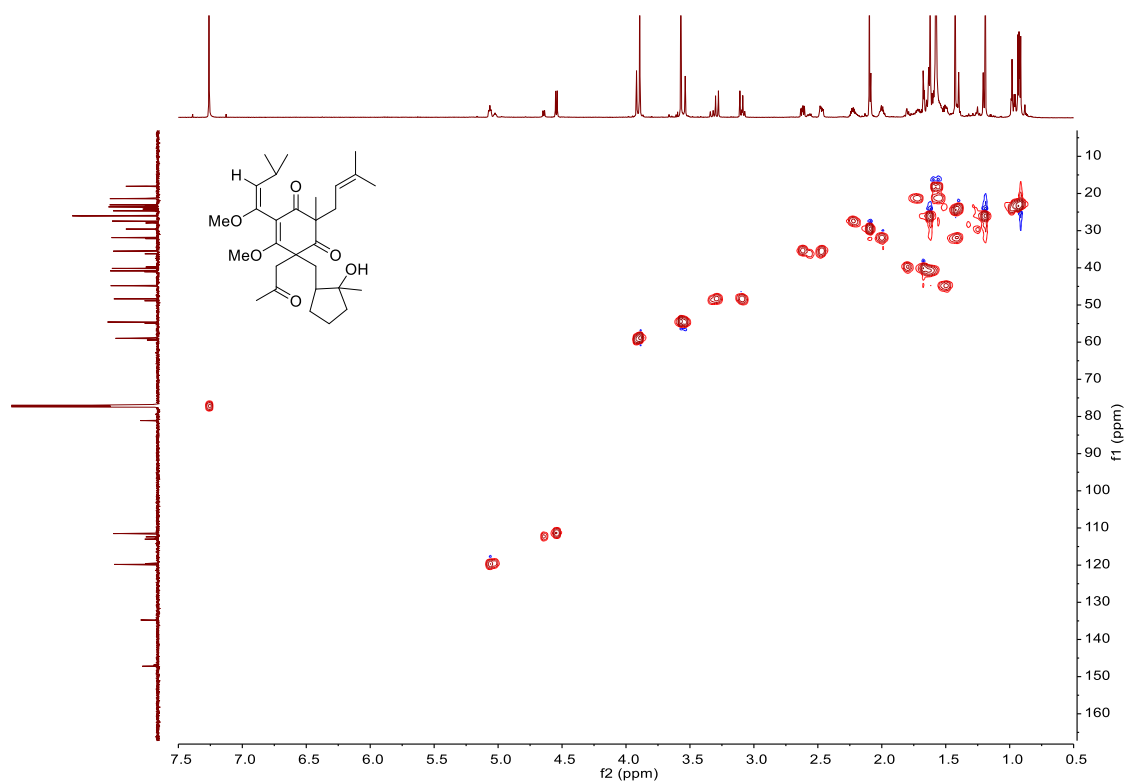

**Figure S100.** <sup>1</sup>H-<sup>1</sup>H COSY spectrum of compound **11** (Recorded in CDCl<sub>3</sub>, 298 K)

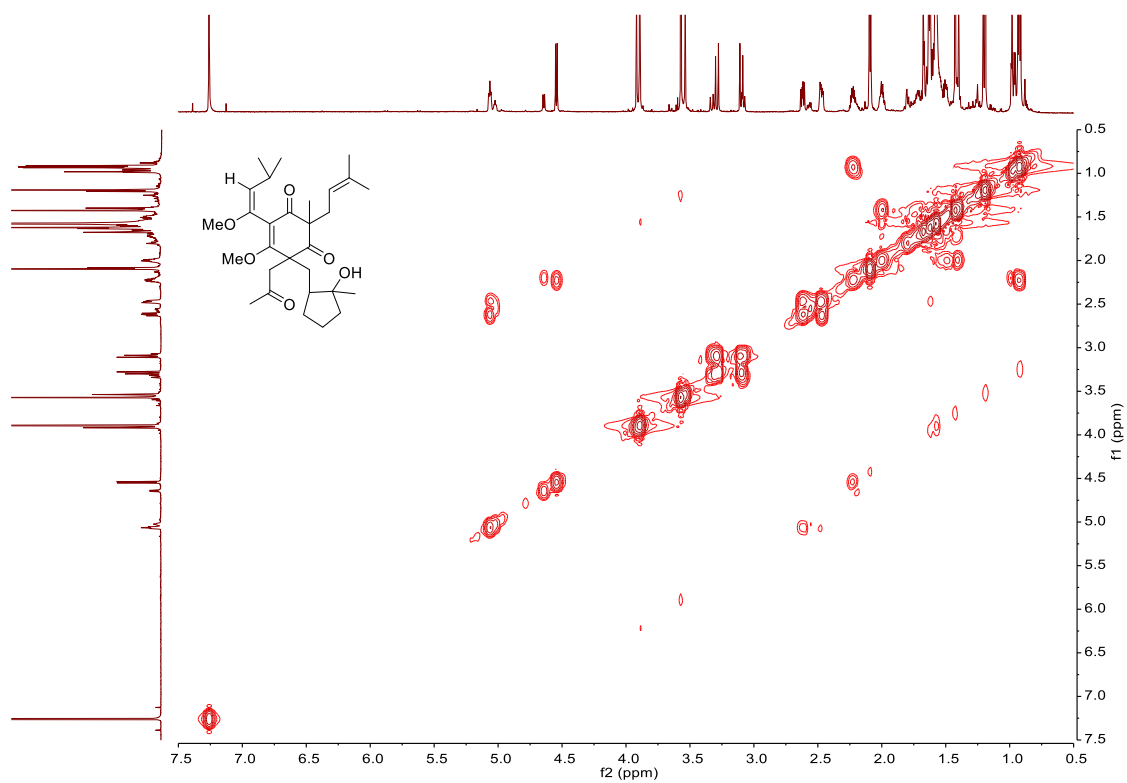

Figure S101. HMBC spectrum of compound **11** (Recorded in CDCl<sub>3</sub>, 298 K)

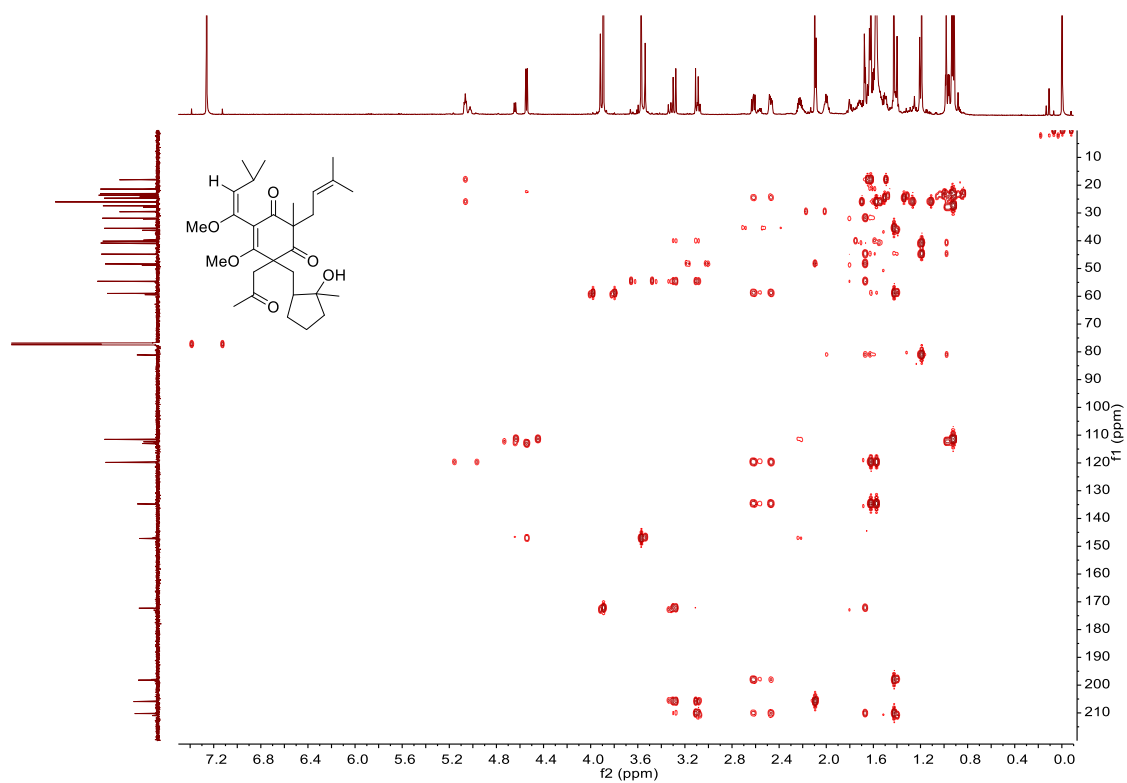

Figure S102. NOESY spectrum of compound **11** (Recorded in CDCl<sub>3</sub>, 298 K)

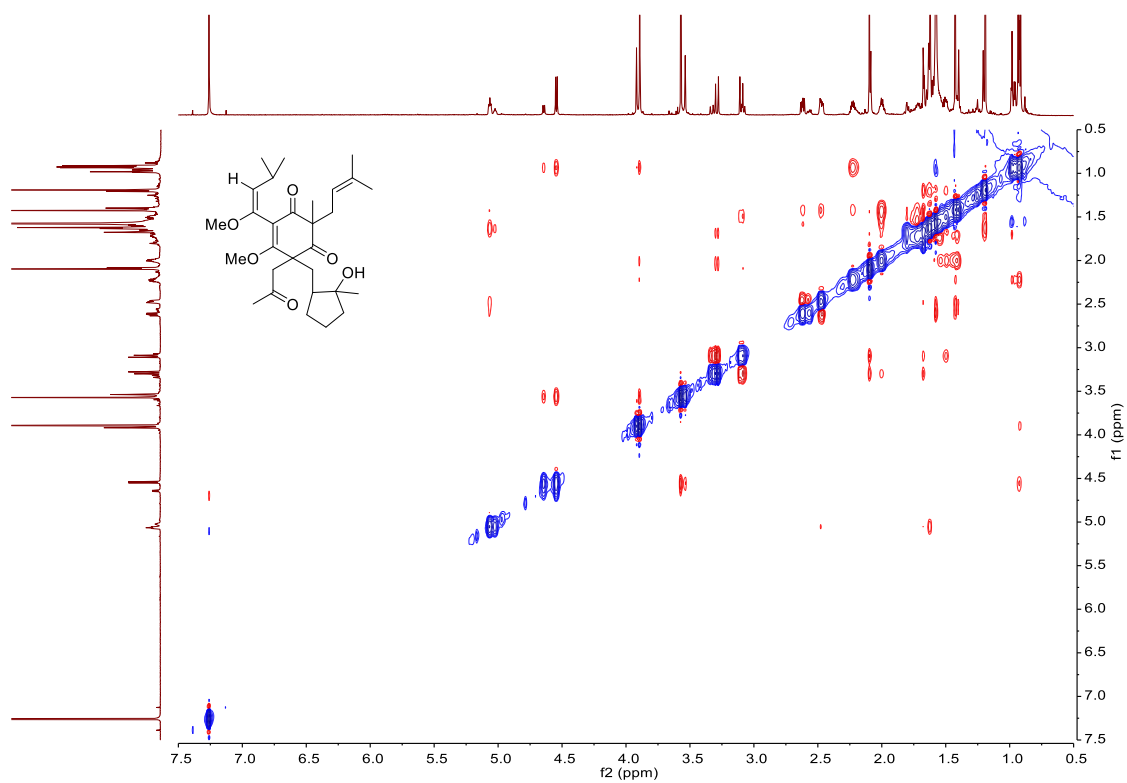

**Figure S103.** HRESIMS of compound **11**

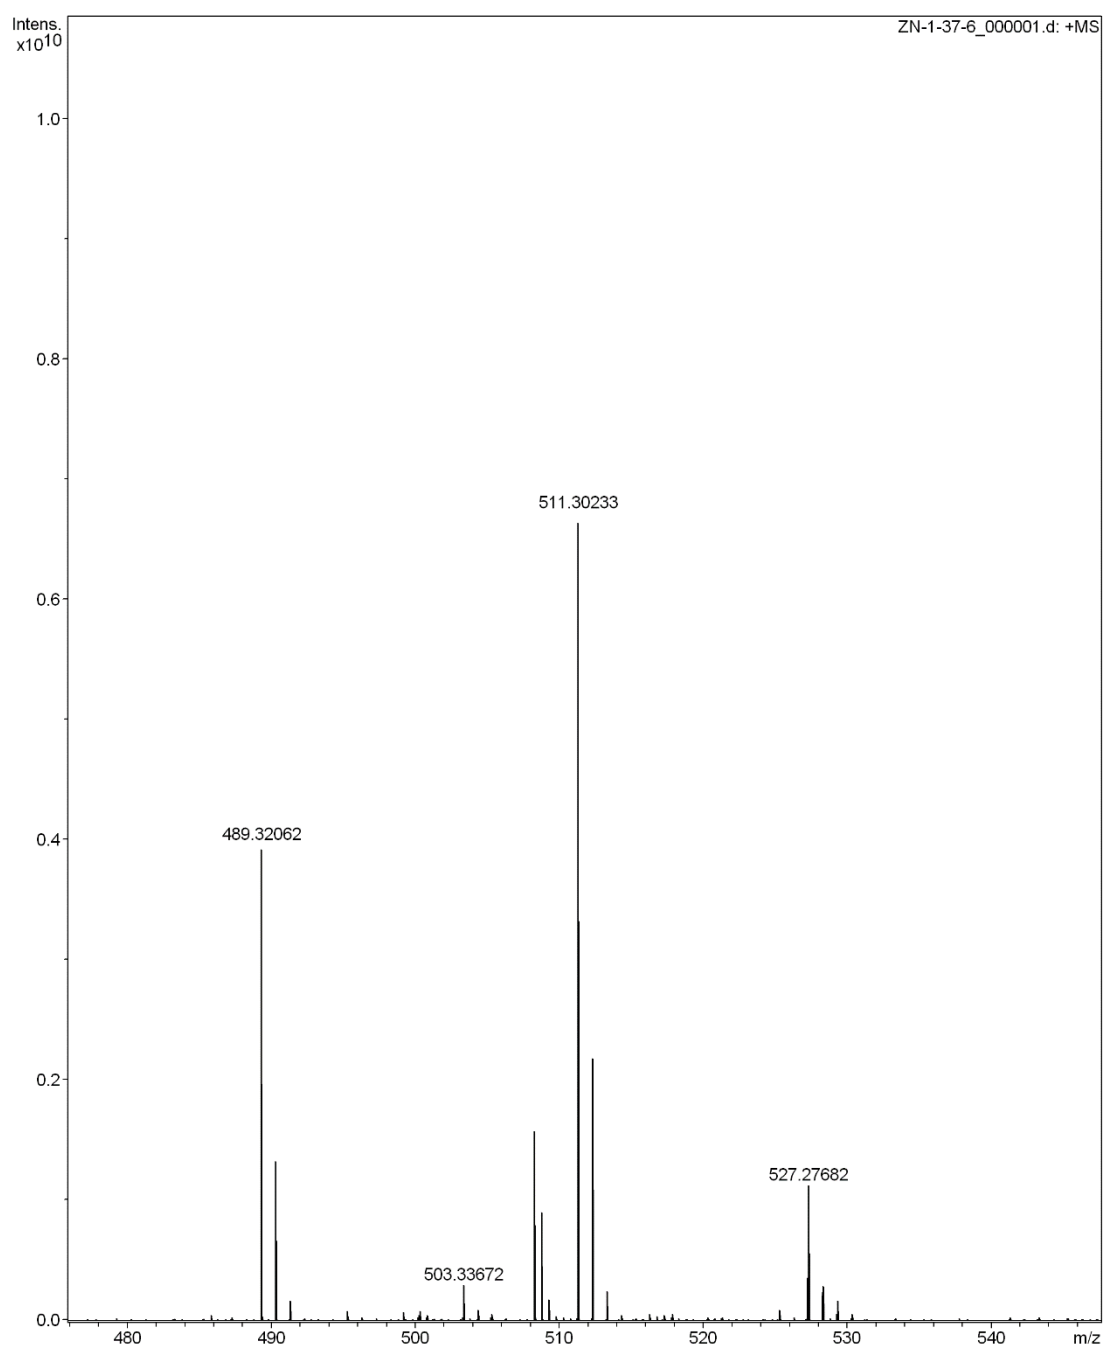

**Figure S104.**  $^1\text{H}$  NMR (600 MHz) spectrum of compound **12** (Recorded in  $\text{CDCl}_3$ , 298 K)

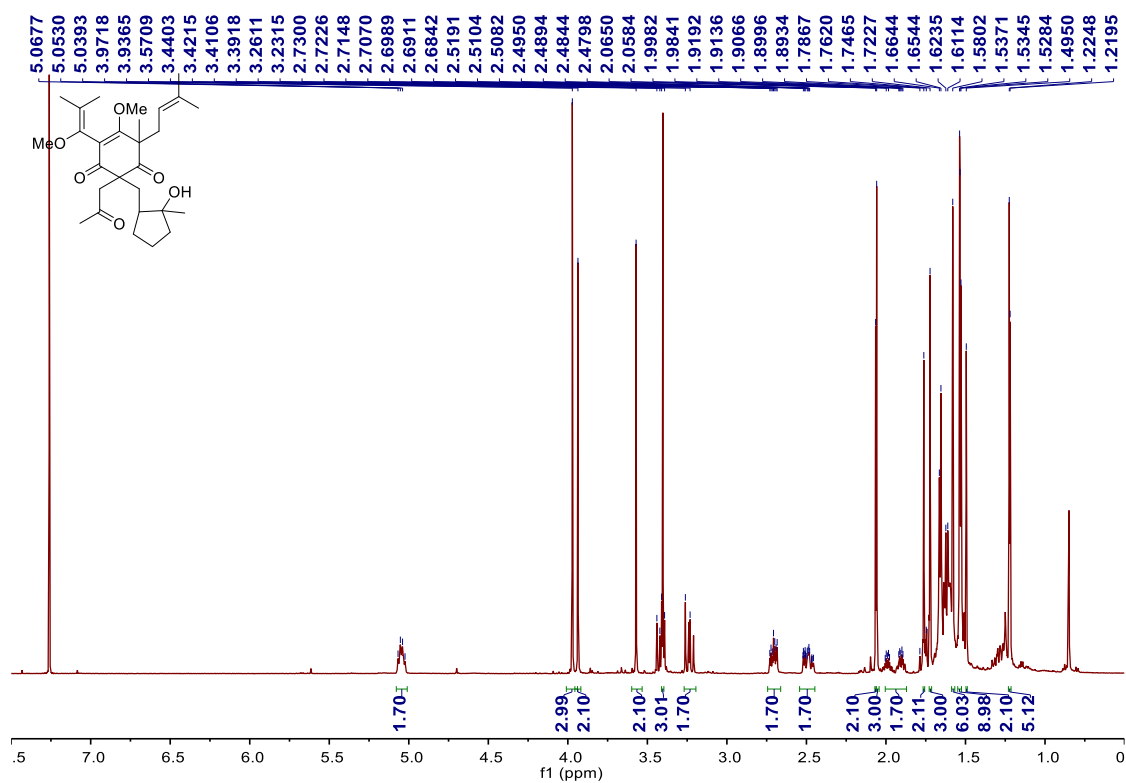

**Figure S105.**  $^{13}\text{C}$  NMR (150 MHz) spectrum of compound **12** (Recorded in  $\text{CDCl}_3$ , 298 K)

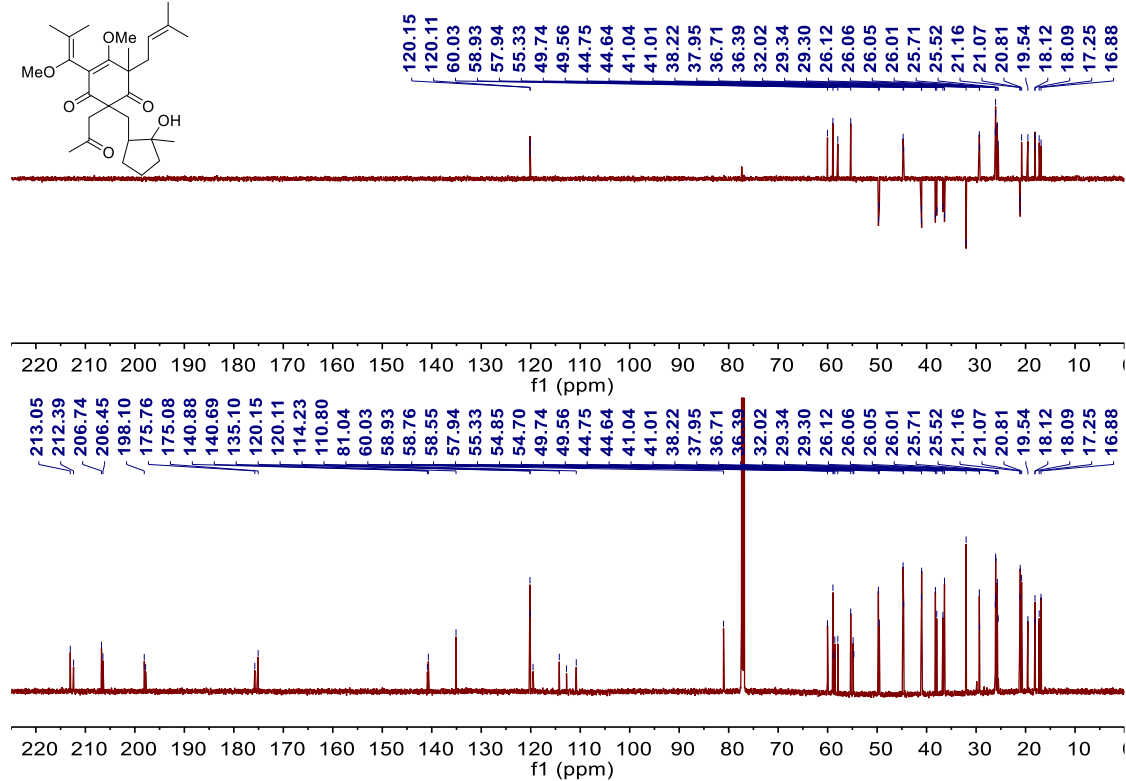

**Figure S106.** HSQC spectrum of compound **12** (Recorded in CDCl<sub>3</sub>, 298 K)

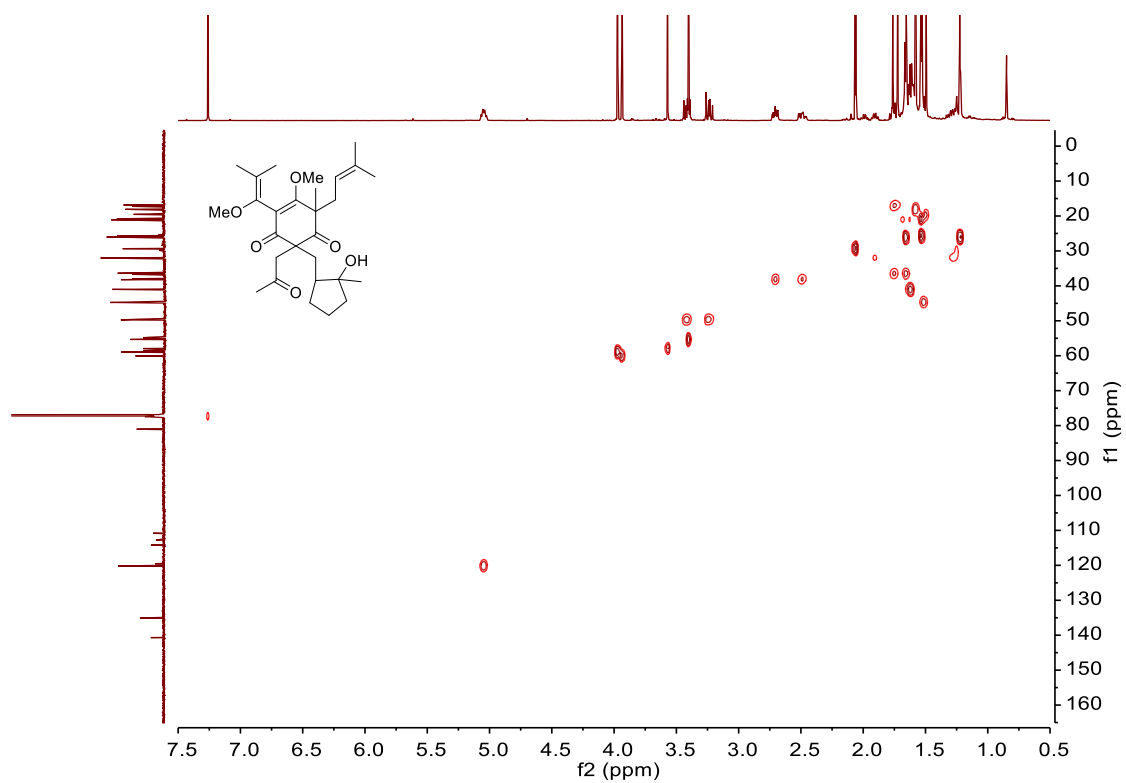

**Figure S107.** <sup>1</sup>H-<sup>1</sup>H COSY spectrum of compound **12** (Recorded in CDCl<sub>3</sub>, 298 K)

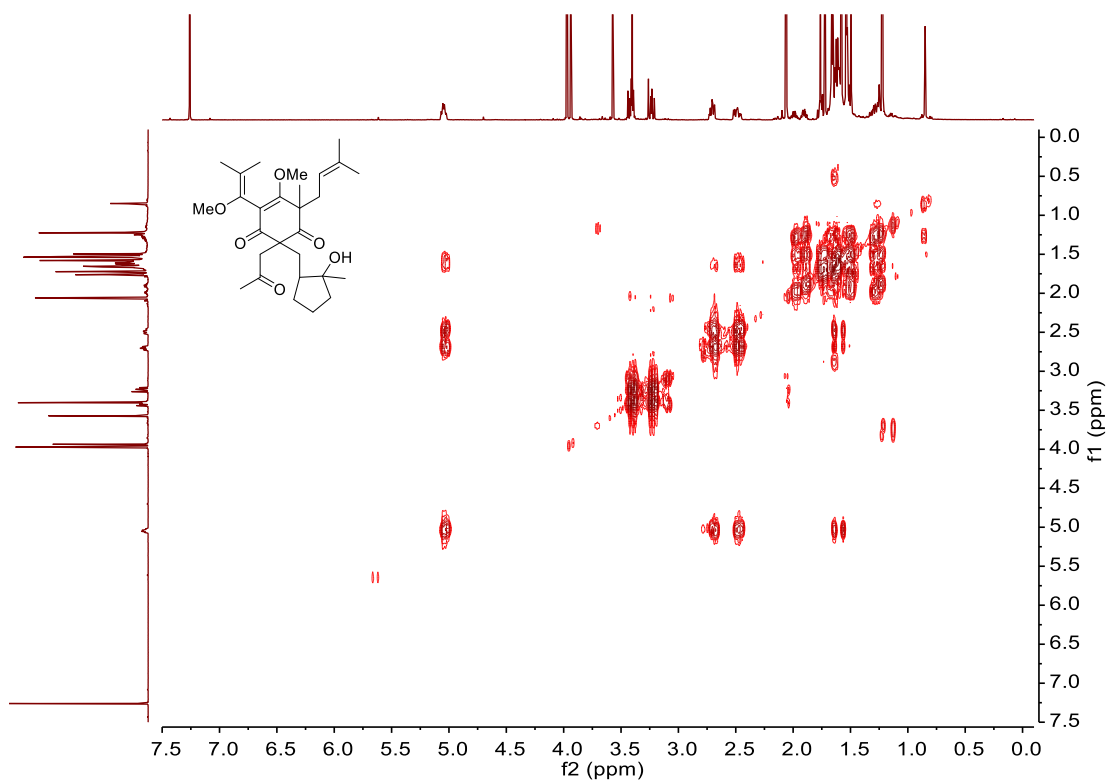

Figure S108. HMBC spectrum of compound **12** (Recorded in CDCl<sub>3</sub>, 298 K)

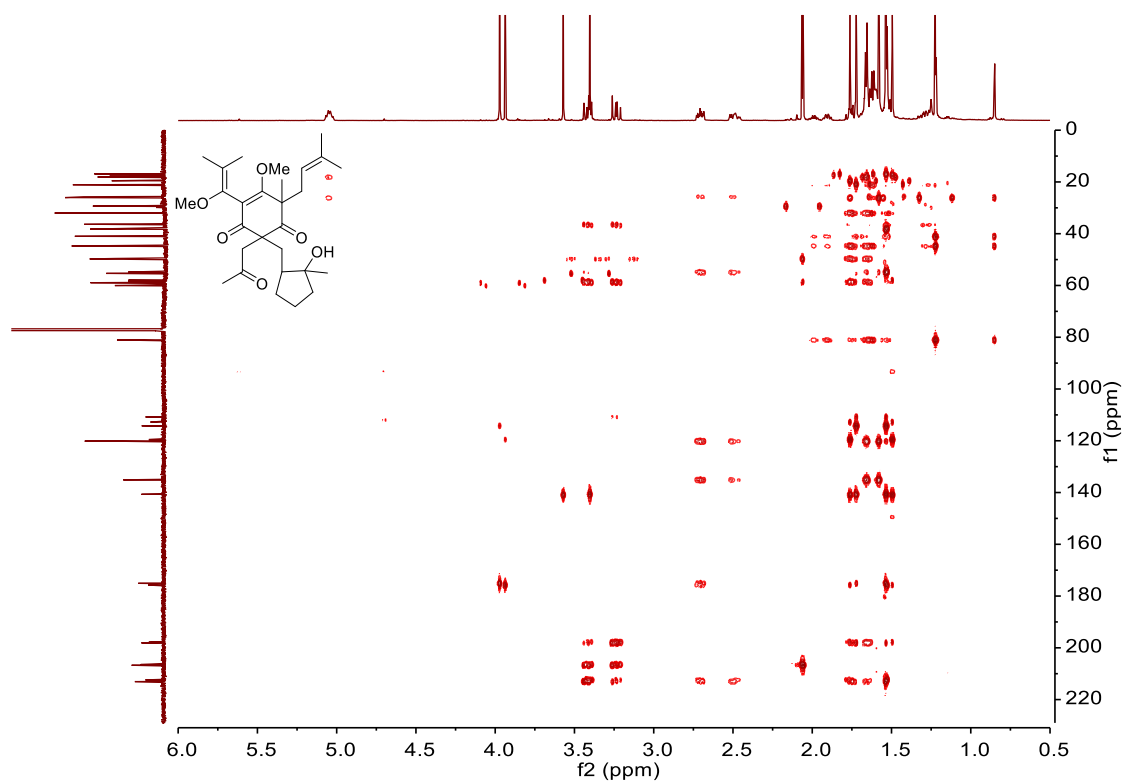

Figure S109. NOESY spectrum of compound **12** (Recorded in CDCl<sub>3</sub>, 298 K)

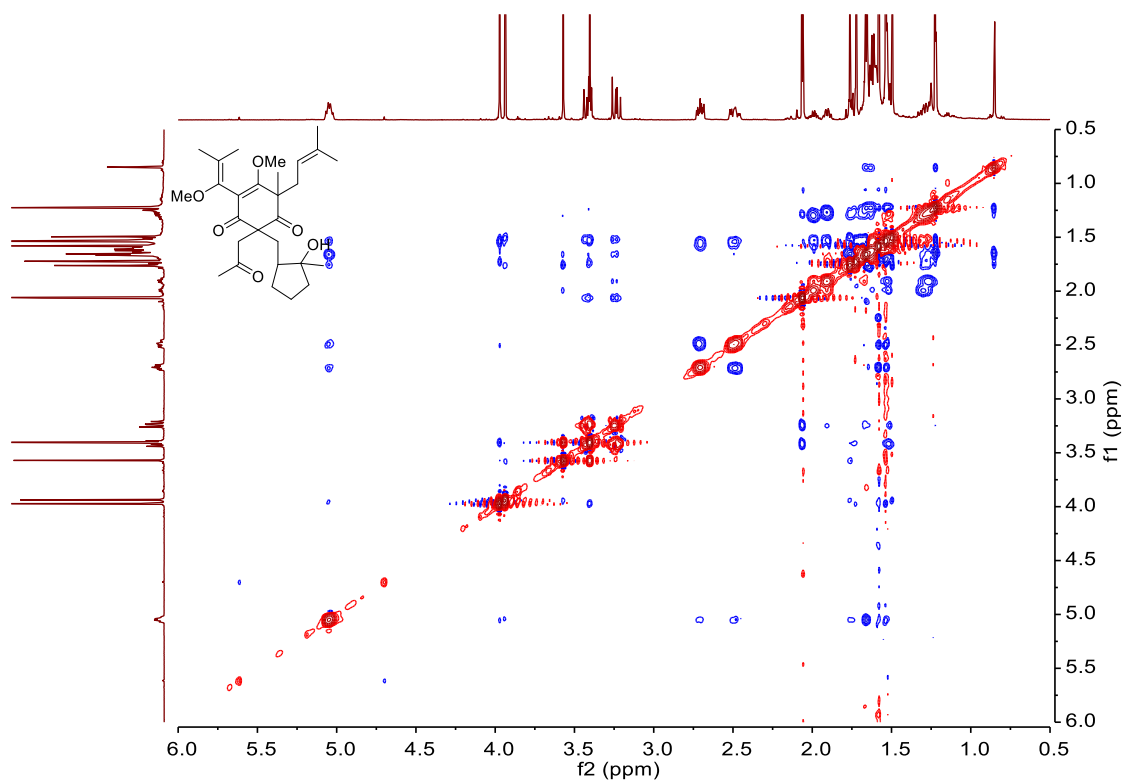



**Figure S110.** HRESIMS of compound **12**

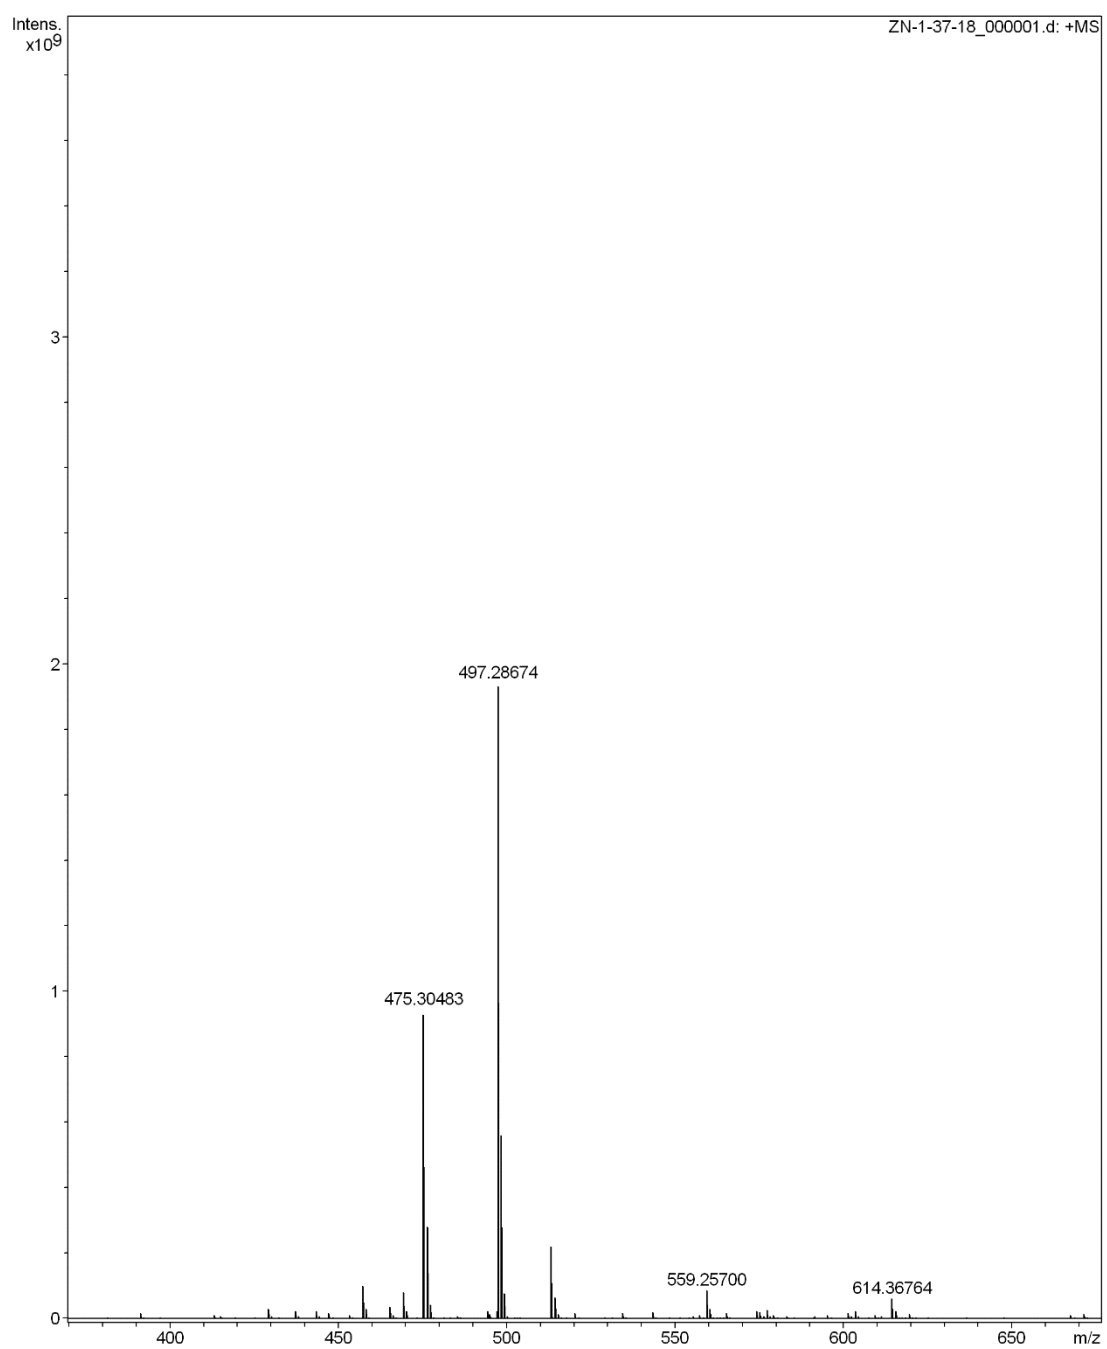

**Figure S111.**  $^1\text{H}$  NMR (600 MHz) spectrum of compound **13** (Recorded in  $\text{CDCl}_3$ , 298 K)

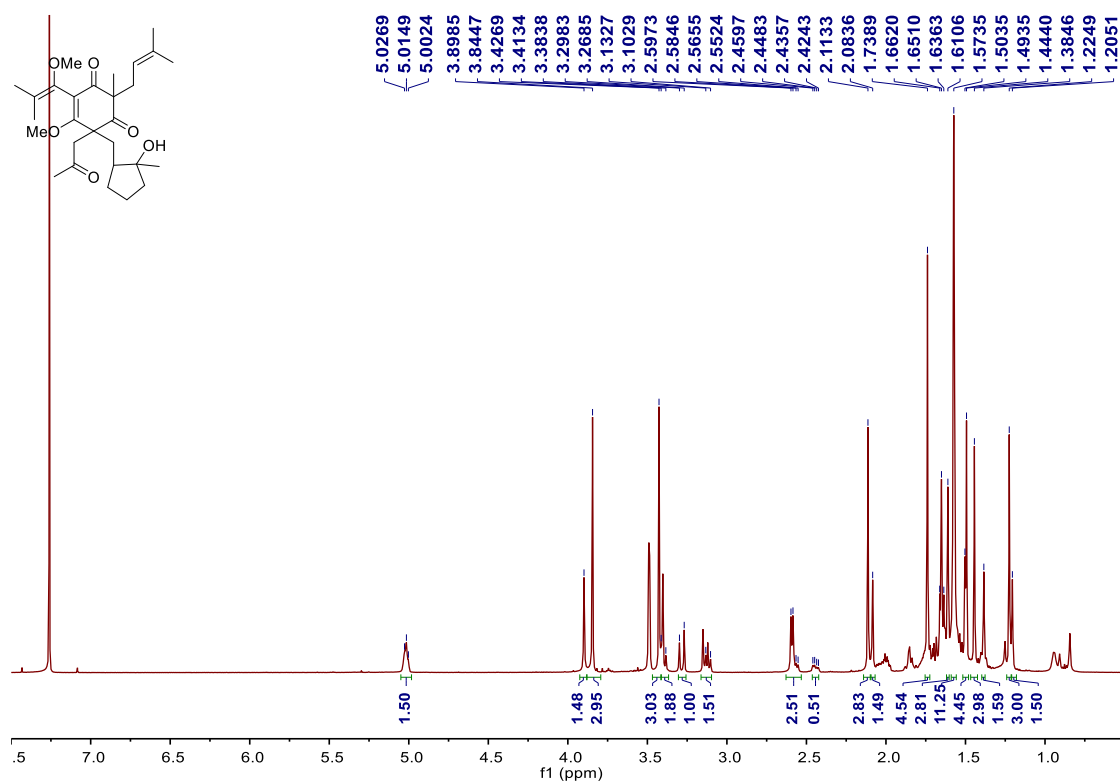

**Figure S112.**  $^{13}\text{C}$  NMR (150 MHz) spectrum of compound **13** (Recorded in  $\text{CDCl}_3$ , 298 K)

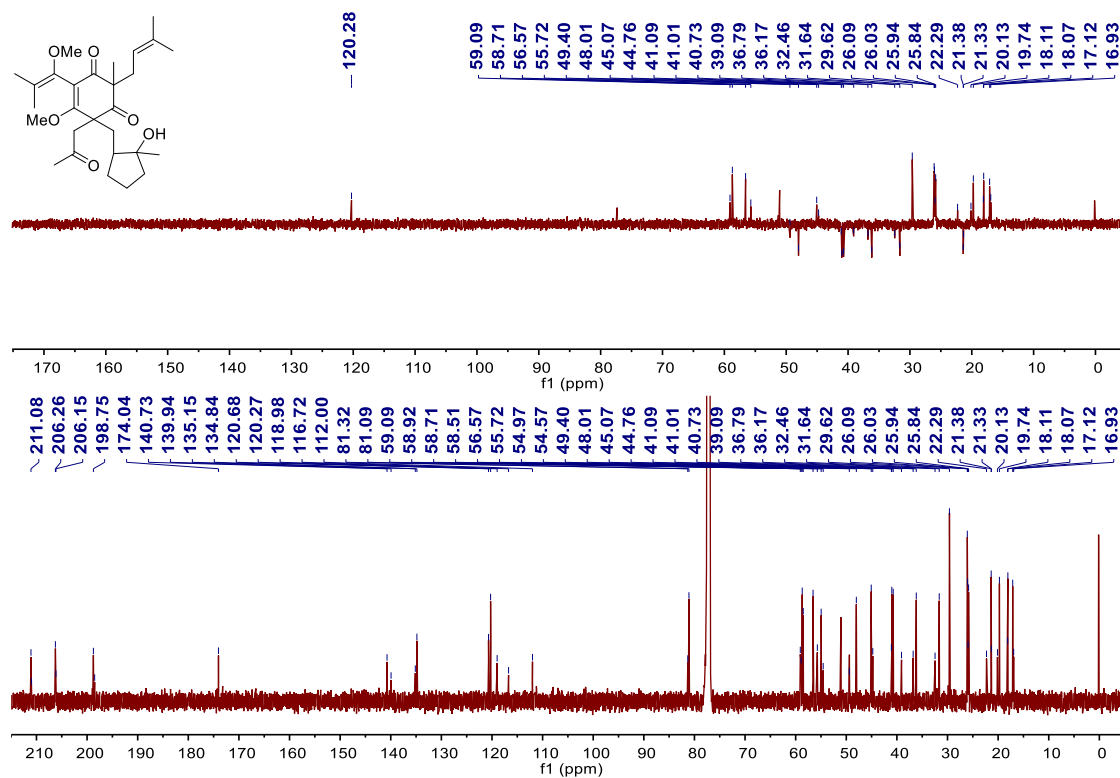

Figure S113. HSQC spectrum of compound **13** (Recorded in CDCl<sub>3</sub>, 298 K)

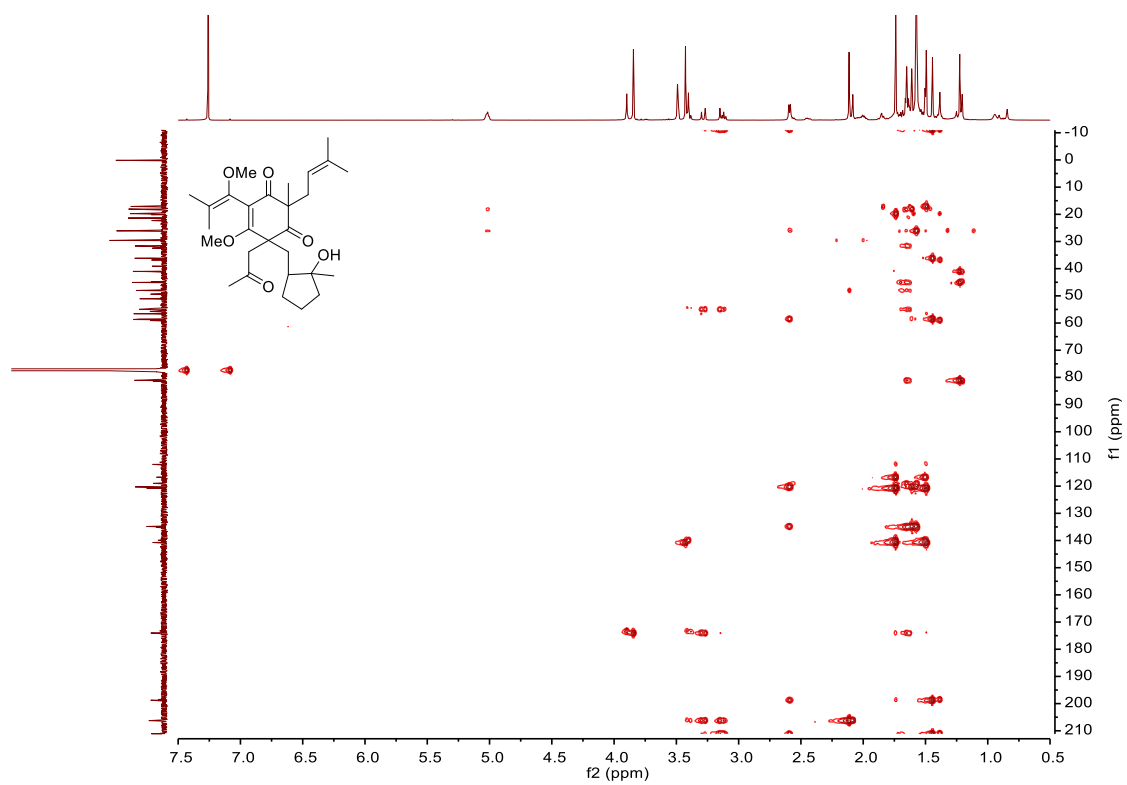

Figure S114. HMBC spectrum of compound **13** (Recorded in CDCl<sub>3</sub>, 298 K)

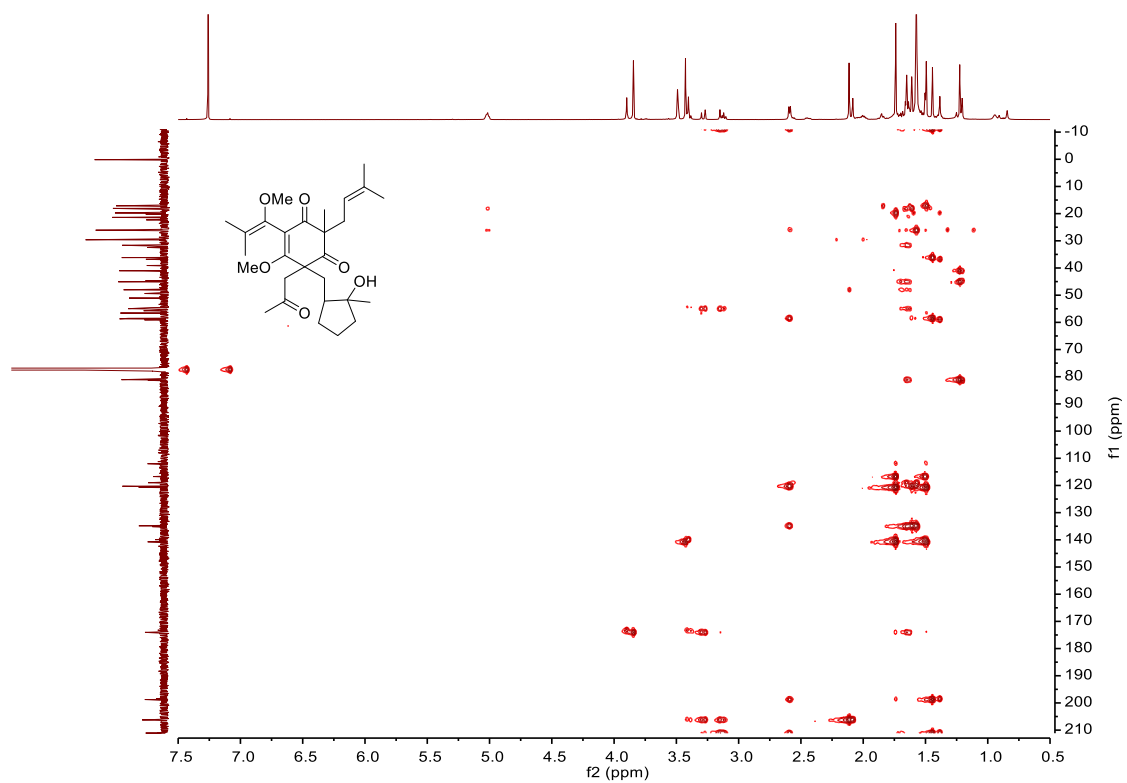

**Figure S115.** NOESY spectrum of compound **13** (Recorded in CDCl<sub>3</sub>, 298 K)

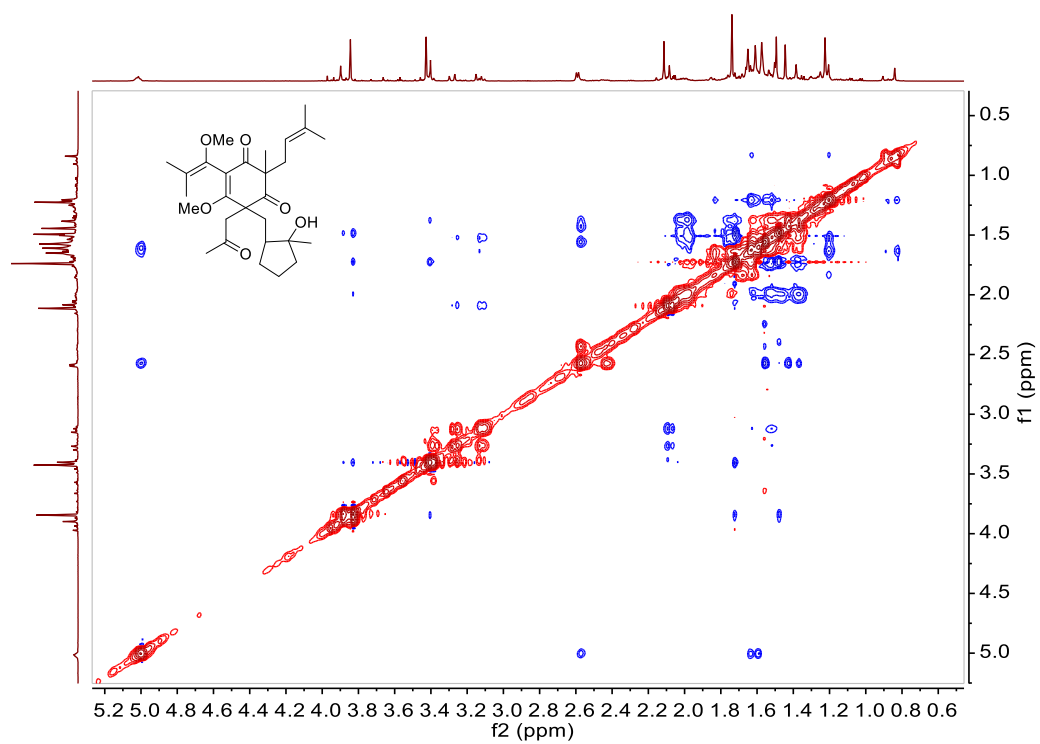

**Figure S116.** HRESIMS of compound **13**

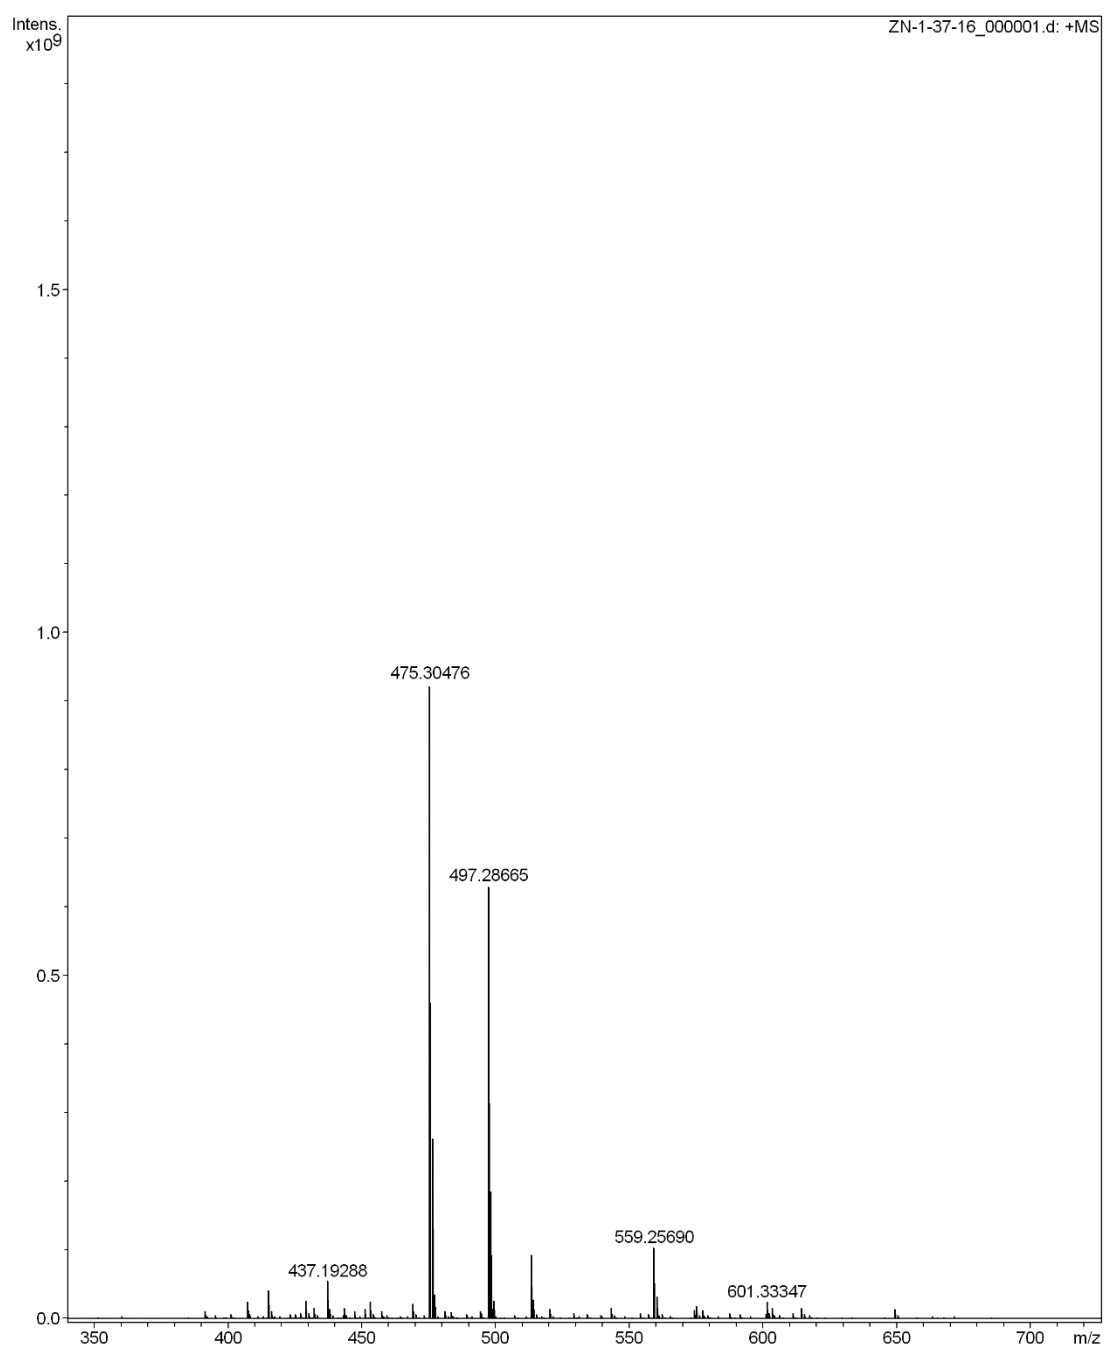

Figure S117. Experimental ECD spectra of 1, 4–7.

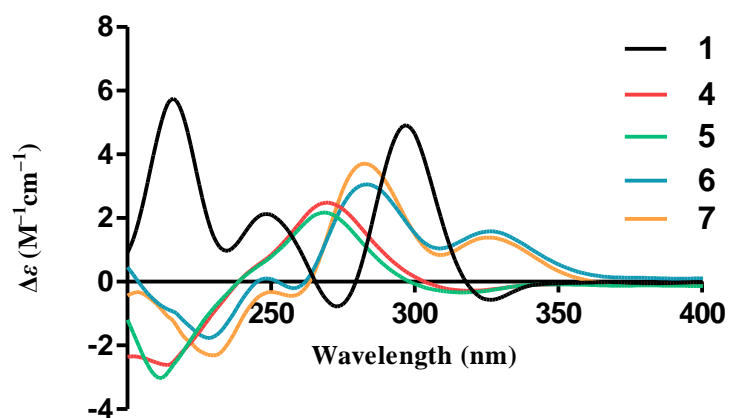

Figure S118. Experimental ECD spectra of 2, 8–11.

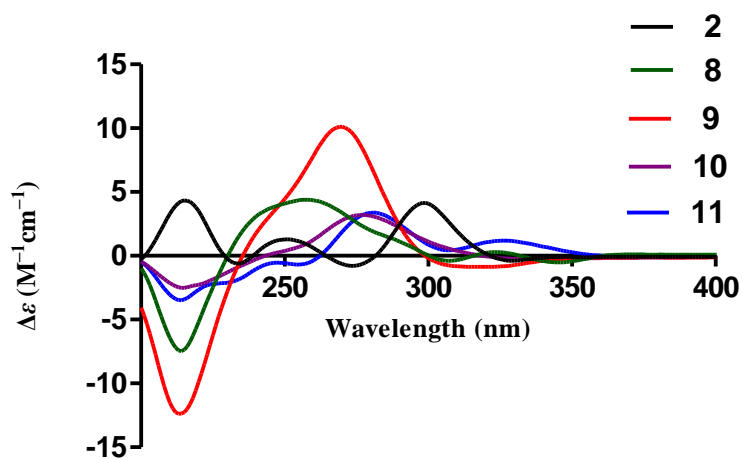

Figure S119. Experimental ECD spectra of 3, 12–13.

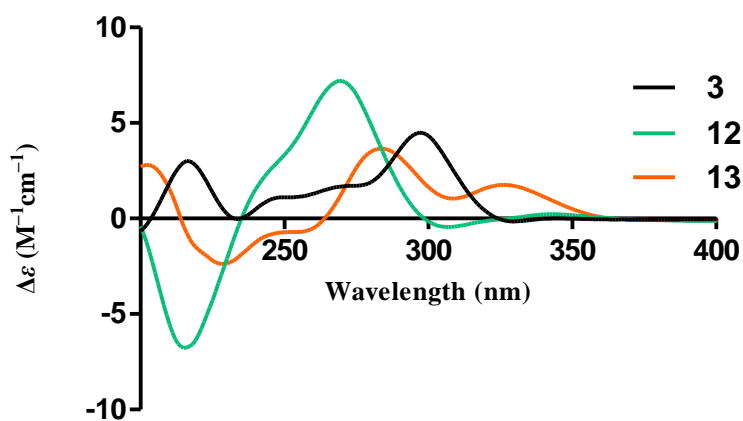

Supplement: c9qo00245f1.pdf [file c9qo00245f1.pdf]
